# Supplementary material for: Long-term and recent trends in hypertension awareness, treatment, and control in 12 high-income countries: an analysis of 123 nationally representative surveys
Source: PubMed Central journal article supplement (PMC6717084; doi:10.1016/s0140-6736(19)31145-6), 2019-08-24
Supplement: mmc1.pdf [file mmc1.pdf]

# THE LANCET

## Supplementary appendix

This appendix formed part of the original submission and has been peer reviewed. We post it as supplied by the authors.

Supplement to: NCD Risk Factor Collaboration (NCD-RisC). Long-term and recent trends in hypertension awareness, treatment, and control in 12 high-income countries: an analysis of 123 nationally representative surveys. *Lancet* 2019; published online July 18. [http://dx.doi.org/10.1016/S0140-6736\(19\)31145-6](http://dx.doi.org/10.1016/S0140-6736(19)31145-6).

## **Appendix**

### **Long-term and recent trends in hypertension awareness, treatment, and control in 12 high-income countries: an analysis of 123 nationally representative surveys**

NCD Risk Factor Collaboration (NCD-RisC)

**Appendix Table 1.** Data availability by country.

| <b>Country</b>           | <b>Start year</b> | <b>End year</b> | <b>Number of data sources<br/>(number of data sources with<br/>diagnosis information )</b> |
|--------------------------|-------------------|-----------------|--------------------------------------------------------------------------------------------|
| Australia                | 1980              | 2012            | 8 (6)                                                                                      |
| Canada                   | 1981              | 2017            | 7 (7)                                                                                      |
| Finland                  | 1997              | 2017            | 9 (9)                                                                                      |
| Germany                  | 1998              | 2011            | 2 (2)                                                                                      |
| Ireland                  | 2007              | 2010            | 2 (2)                                                                                      |
| Italy                    | 1992              | 2012            | 6 (6)                                                                                      |
| Japan                    | 1980              | 2015            | 31 (4)                                                                                     |
| New Zealand              | 2009              | 2016            | 5 (4)                                                                                      |
| South Korea              | 1998              | 2016            | 13 (13)                                                                                    |
| Spain                    | 1990              | 2015            | 4 (4)                                                                                      |
| United Kingdom           | 1992              | 2016            | 25 (18)                                                                                    |
| United States of America | 1976              | 2016            | 11 (11)                                                                                    |
| <b>Total</b>             | <b>1976</b>       | <b>2017</b>     | <b>123 (86)</b>                                                                            |

**Appendix Table 2.** Data sources used in the analysis.

|    | Country   | Data years | Survey/Study name/Citation                                            | Age range as in the NCD-RisC database |        | Sample size |        | Number of blood pressure measurements taken | Whether multiple cuff sizes were available for measurement | Type of device used to measure blood pressure | Note |
|----|-----------|------------|-----------------------------------------------------------------------|---------------------------------------|--------|-------------|--------|---------------------------------------------|------------------------------------------------------------|-----------------------------------------------|------|
|    |           |            |                                                                       | Male                                  | Female | Male        | Female |                                             |                                                            |                                               |      |
| 1  | Australia | 1980       | Risk Factor Prevalence Study                                          | 25-64                                 | 25-64  | 2,756       | 2,781  | 2                                           | No                                                         | Standard                                      | 1    |
| 2  | Australia | 1983       | Risk Factor Prevalence Study                                          | 25-64                                 | 25-64  | 3,733       | 3,812  | 2                                           | No                                                         | Standard                                      | 1    |
| 3  | Australia | 1989       | Risk Factor Prevalence Study                                          | 20-69                                 | 20-69  | 4,551       | 4,727  | 2                                           | Unknown                                                    | Standard                                      | 1    |
| 4  | Australia | 1995-1996  | National Nutrition Study                                              | 16+                                   | 16+    | 5,227       | 5,700  | 2 or 3                                      | Yes                                                        | Standard                                      | 2    |
| 5  | Australia | 1999-2000  | The Australian Diabetes, Obesity and Lifestyle Study (AusDiab)        | 25+                                   | 25+    | 5,023       | 6,113  | 3                                           | Yes                                                        | Standard and Digital                          |      |
| 6  | Australia | 2004-2005  | The Australian Diabetes, Obesity and Lifestyle Study (AusDiab)        | 30+                                   | 30+    | 2,885       | 3,478  | 3                                           | Yes                                                        | Digital                                       |      |
| 7  | Australia | 2011-2012  | Australian Health Survey                                              | 10+                                   | 10+    | 11,290      | 12,309 | 2 or 3                                      | Yes                                                        | Digital                                       | 2    |
| 8  | Australia | 2012       | The Australian Diabetes, Obesity and Lifestyle Study (AusDiab)        | 37+                                   | 37+    | 2,052       | 2,536  | 3                                           | Yes                                                        | Digital                                       |      |
| 9  | Canada    | 1981       | Canada Fitness Survey                                                 | 10-69                                 | 10-69  | 5,630       | 6,197  | 2                                           | Yes                                                        | Standard                                      |      |
| 10 | Canada    | 1986-1992  | Canada Heart Health Survey                                            | 18-74                                 | 18-74  | 11,353      | 11,737 | 2 to 4                                      | Yes                                                        | Standard                                      |      |
| 11 | Canada    | 2007-2009  | Canadian Health Measures Survey, Cycle 1                              | 6-79                                  | 6-79   | 2,701       | 2,893  | 6 to 12                                     | Yes                                                        | Digital                                       |      |
| 12 | Canada    | 2009-2011  | Canadian Health Measures Survey, Cycle 2                              | 6-79                                  | 6-79   | 2,764       | 3,019  | 6 to 12                                     | Yes                                                        | Digital                                       |      |
| 13 | Canada    | 2012-2013  | Canadian Health Measures Survey, Cycle 3                              | 6-79                                  | 6-79   | 2,594       | 2,619  | 6 to 12                                     | Yes                                                        | Digital                                       |      |
| 14 | Canada    | 2014-2015  | Canadian Health Measures Survey, Cycle 4                              | 6-79                                  | 6-79   | 2,603       | 2,602  | 6 to 12                                     | Yes                                                        | Digital                                       |      |
| 15 | Canada    | 2016-2017  | Canadian Health Measures Survey, Cycle 5                              | 6-79                                  | 6-79   | 2,588       | 2,589  | 6 to 12                                     | Yes                                                        | Digital                                       |      |
| 16 | Finland   | 1997       | The National FINRISK Study                                            | 25-74                                 | 25-74  | 4,248       | 4,184  | 2                                           | Yes                                                        | Standard                                      |      |
| 17 | Finland   | 2000-2001  | Health 2000 Survey                                                    | 30+                                   | 30+    | 2,870       | 3,463  | 2                                           | Yes                                                        | Standard                                      |      |
| 18 | Finland   | 2002       | The National FINRISK Study                                            | 25-74                                 | 25-74  | 3,267       | 3,814  | 3                                           | Yes                                                        | Standard                                      |      |
| 19 | Finland   | 2007       | The National FINRISK Study                                            | 25-74                                 | 25-74  | 2,926       | 3,310  | 3                                           | Yes                                                        | Standard                                      |      |
| 20 | Finland   | 2008       | Control group for Finnish male former elite athletes                  | 61+                                   |        | 207         |        | 2                                           | No                                                         | Standard                                      |      |
| 21 | Finland   | 2011       | Young Finns Study                                                     | 34-49                                 | 34-49  | 865         | 1,057  | 3                                           | Yes                                                        | Random-zero                                   |      |
| 22 | Finland   | 2011-2012  | Health 2011 Survey                                                    | 30+                                   | 30+    | 2,061       | 2,563  | 2                                           | Yes                                                        | Standard                                      |      |
| 23 | Finland   | 2012       | The National FINRISK Study                                            | 25-74                                 | 25-74  | 2,771       | 3,042  | 3                                           | Yes                                                        | Standard                                      |      |
| 24 | Finland   | 2017       | The FinHealth Survey                                                  | 18+                                   | 18+    | 2,677       | 3,115  | 3                                           | Yes                                                        | Standard                                      |      |
| 25 | Germany   | 1997-1999  | German National Health Interview and Examination Survey (GNHIES98)    | 18-79                                 | 18-79  | 3,445       | 3,616  | 3                                           | Yes                                                        | Standard                                      |      |
| 26 | Germany   | 2008-2011  | German Health Interview and Examination Survey for adults (DEGS1)     | 18-79                                 | 18-79  | 3,405       | 3,665  | 3                                           | Yes                                                        | Digital                                       |      |
| 27 | Ireland   | 2006-2007  | Survey of Lifestyle, Attitudes and Nutritional in Ireland             | 45+                                   | 45+    | 526         | 679    | 3                                           | Yes                                                        | Digital                                       |      |
| 28 | Ireland   | 2009-2011  | The Irish Longitudinal Study on Ageing                                | 50+                                   | 50+    | 2,696       | 3,173  | 2                                           | Yes                                                        | Digital                                       |      |
| 29 | Italy     | 1992-1993  | Italian Longitudinal Study on Aging                                   | 65-84                                 | 65-84  | 1,828       | 1,669  | 3                                           | Yes                                                        | Standard                                      |      |
| 30 | Italy     | 1995-1996  | Italian Longitudinal Study on Aging                                   | 68-90                                 | 68-90  | 1,133       | 1,003  | 3                                           | Yes                                                        | Standard                                      |      |
| 31 | Italy     | 1998-2002  | Osservatorio Epidemiologico Cardiovascolare                           | 35-74                                 | 35-74  | 4,878       | 4,772  | 2                                           | Yes                                                        | Standard                                      |      |
| 32 | Italy     | 2000-2001  | Italian Longitudinal Study on Aging                                   | 73-93                                 | 73-93  | 683         | 671    | 3                                           | Yes                                                        | Standard                                      |      |
| 33 | Italy     | 2004-2005  | Italian Project on the Epidemiology of Alzheimer's Disease            | 65-84                                 | 65-84  | 1,578       | 1,440  | 2                                           | No                                                         | Standard                                      |      |
| 34 | Italy     | 2008-2012  | Osservatorio Epidemiologico Cardiovascolare/Health Examination Survey | 35-80                                 | 35-80  | 4,370       | 4,337  | 3                                           | Yes                                                        | Standard                                      |      |
| 35 | Japan     | 1980       | National Cardiovascular Survey                                        | 30+                                   | 30+    | 6,323       | 7,916  | 1                                           | Yes                                                        | Standard                                      |      |
| 36 | Japan     | 1986       | National Nutrition Survey                                             | 20+                                   | 20+    | 5,471       | 7,050  | 1                                           | Yes                                                        | Standard                                      | 2    |
| 37 | Japan     | 1987       | National Nutrition Survey                                             | 20+                                   | 20+    | 4,485       | 6,485  | 1                                           | Yes                                                        | Standard                                      | 2    |
| 38 | Japan     | 1988       | National Nutrition Survey                                             | 20+                                   | 20+    | 4,528       | 6,254  | 1                                           | Yes                                                        | Standard                                      | 2    |
| 39 | Japan     | 1989       | National Nutrition Survey                                             | 20+                                   | 20+    | 4,066       | 5,548  | 1                                           | Yes                                                        | Standard                                      | 2    |
| 40 | Japan     | 1990       | National Nutrition Survey and National Cardiovascular Survey          | 20+                                   | 20+    | 4,448       | 5,988  | 1                                           | Yes                                                        | Standard                                      |      |
| 41 | Japan     | 1991       | National Nutrition Survey                                             | 20+                                   | 20+    | 4,237       | 5,706  | 1                                           | Yes                                                        | Standard                                      | 2    |
| 42 | Japan     | 1992       | National Nutrition Survey                                             | 20+                                   | 20+    | 3,879       | 5,307  | 1                                           | Yes                                                        | Standard                                      | 2    |
| 43 | Japan     | 1993       | National Nutrition Survey                                             | 20+                                   | 20+    | 3,492       | 4,921  | 1                                           | Yes                                                        | Standard                                      | 2    |
| 44 | Japan     | 1994       | National Nutrition Survey                                             | 20+                                   | 20+    | 3,342       | 4,783  | 1                                           | Yes                                                        | Standard                                      | 2    |
| 45 | Japan     | 1995       | National Nutrition Survey                                             | 20+                                   | 20+    | 3,269       | 4,654  | 1                                           | Yes                                                        | Standard                                      | 2    |
| 46 | Japan     | 1996       | National Nutrition Survey                                             | 20+                                   | 20+    | 3,152       | 4,476  | 1                                           | Yes                                                        | Standard                                      | 2    |
| 47 | Japan     | 1997       | National Nutrition Survey                                             | 20+                                   | 20+    | 3,069       | 4,386  | 1                                           | Yes                                                        | Standard                                      | 2    |
| 48 | Japan     | 1998       | National Nutrition Survey                                             | 20+                                   | 20+    | 3,281       | 4,681  | 1                                           | Yes                                                        | Standard                                      | 2    |
| 49 | Japan     | 1999       | National Nutrition Survey                                             | 20+                                   | 20+    | 2,550       | 3,814  | 1                                           | Yes                                                        | Standard                                      | 2    |
| 50 | Japan     | 2000       | National Nutrition Survey and National Cardiovascular Survey          | 20+                                   | 20+    | 2,690       | 3,788  | 2                                           | Yes                                                        | Standard                                      |      |
| 51 | Japan     | 2001       | National Nutrition Survey                                             | 20+                                   | 20+    | 2,465       | 3,754  | 2                                           | Yes                                                        | Standard                                      | 2    |
| 52 | Japan     | 2002       | National Nutrition Survey                                             | 20+                                   | 20+    | 2,394       | 3,473  | 2                                           | Yes                                                        | Standard                                      | 2    |
| 53 | Japan     | 2003       | National Health and Nutrition Survey                                  | 20+                                   | 20+    | 2,350       | 3,491  | 2                                           | Yes                                                        | Standard                                      | 2    |
| 54 | Japan     | 2004       | National Health and Nutrition Survey                                  | 20+                                   | 20+    | 1,743       | 2,590  | 2                                           | Yes                                                        | Standard                                      | 2    |
| 55 | Japan     | 2005       | National Health and Nutrition Survey                                  | 20+                                   | 20+    | 1,723       | 2,496  | 2                                           | Yes                                                        | Standard                                      | 2    |
| 56 | Japan     | 2006       | National Health and Nutrition Survey                                  | 20+                                   | 20+    | 1,925       | 2,787  | 2                                           | Yes                                                        | Standard                                      | 2    |

|     | Country        | Data years | Survey/Study name/Citation                                                                                                                                                           | Age range as in the NCD-RisC database |        | Sample size |        | Number of blood pressure measurements taken | Whether multiple cuff sizes were available for measurement | Type of device used to measure blood pressure | Note |
|-----|----------------|------------|--------------------------------------------------------------------------------------------------------------------------------------------------------------------------------------|---------------------------------------|--------|-------------|--------|---------------------------------------------|------------------------------------------------------------|-----------------------------------------------|------|
|     |                |            |                                                                                                                                                                                      | Male                                  | Female | Male        | Female |                                             |                                                            |                                               |      |
| 57  | Japan          | 2007       | National Health and Nutrition Survey                                                                                                                                                 | 20+                                   | 20+    | 1,810       | 2,634  | 2                                           | Yes                                                        | Standard                                      | 2    |
| 58  | Japan          | 2008       | National Health and Nutrition Survey                                                                                                                                                 | 20+                                   | 20+    | 1,981       | 2,822  | 2                                           | Yes                                                        | Standard                                      | 2    |
| 59  | Japan          | 2009       | National Health and Nutrition Survey                                                                                                                                                 | 20+                                   | 20+    | 1,887       | 2,726  | 2                                           | Yes                                                        | Standard                                      | 2    |
| 60  | Japan          | 2010       | National Health and Nutrition Survey                                                                                                                                                 | 20+                                   | 20+    | 1,758       | 2,470  | 2                                           | Yes                                                        | Standard                                      |      |
| 61  | Japan          | 2011       | National Health and Nutrition Survey                                                                                                                                                 | 20+                                   | 20+    | 1,652       | 2,326  | 2                                           | Yes                                                        | Standard                                      | 2    |
| 62  | Japan          | 2012       | National Health and Nutrition Survey                                                                                                                                                 | 20+                                   | 20+    | 6,163       | 8,875  | 2                                           | Yes                                                        | Standard                                      | 2    |
| 63  | Japan          | 2013       | National Health and Nutrition Survey                                                                                                                                                 | 20+                                   | 20+    | 1,487       | 2,061  | 2                                           | Yes                                                        | Standard                                      | 2    |
| 64  | Japan          | 2014       | National Health and Nutrition Survey                                                                                                                                                 | 20+                                   | 20+    | 1,555       | 2,141  | 2                                           | Yes                                                        | Standard                                      | 2    |
| 65  | Japan          | 2015       | National Health and Nutrition Survey                                                                                                                                                 | 20+                                   | 20+    | 1,433       | 2,091  | 2                                           | Yes                                                        | Standard                                      | 2    |
| 66  | South Korea    | 1998       | Korea National Health and Nutrition Examination Survey                                                                                                                               | 10+                                   | 10+    | 4,514       | 5,193  | 2                                           | Yes                                                        | Standard                                      |      |
| 67  | South Korea    | 2001       | Korea National Health and Nutrition Examination Survey                                                                                                                               | 10+                                   | 10+    | 3,269       | 3,998  | 2                                           | Yes                                                        | Standard                                      |      |
| 68  | South Korea    | 2005       | Korea National Health and Nutrition Examination Survey                                                                                                                               | 10+                                   | 10+    | 2,863       | 3,589  | 3                                           | Yes                                                        | Standard                                      |      |
| 69  | South Korea    | 2007       | Korea National Health and Nutrition Examination Survey                                                                                                                               | 10+                                   | 10+    | 1,547       | 1,998  | 3                                           | Yes                                                        | Standard                                      |      |
| 70  | South Korea    | 2008       | Korea National Health and Nutrition Examination Survey                                                                                                                               | 10+                                   | 10+    | 3,480       | 4,478  | 3                                           | Yes                                                        | Standard                                      |      |
| 71  | South Korea    | 2009       | Korea National Health and Nutrition Examination Survey                                                                                                                               | 10+                                   | 10+    | 3,915       | 4,839  | 3                                           | Yes                                                        | Standard                                      |      |
| 72  | South Korea    | 2010       | Korea National Health and Nutrition Examination Survey                                                                                                                               | 10+                                   | 10+    | 3,264       | 4,021  | 3                                           | Yes                                                        | Standard                                      |      |
| 73  | South Korea    | 2011       | Korea National Health and Nutrition Examination Survey                                                                                                                               | 10+                                   | 10+    | 3,104       | 3,941  | 3                                           | Yes                                                        | Standard                                      |      |
| 74  | South Korea    | 2012       | Korea National Health and Nutrition Examination Survey                                                                                                                               | 10+                                   | 10+    | 2,924       | 3,826  | 3                                           | Yes                                                        | Standard                                      |      |
| 75  | South Korea    | 2013       | Korea National Health and Nutrition Examination Survey                                                                                                                               | 10+                                   | 10+    | 2,934       | 3,686  | 3                                           | Yes                                                        | Standard                                      |      |
| 76  | South Korea    | 2014       | Korea National Health and Nutrition Examination Survey                                                                                                                               | 10+                                   | 10+    | 2,727       | 3,551  | 3                                           | Yes                                                        | Standard                                      |      |
| 77  | South Korea    | 2015       | Korea National Health and Nutrition Examination Survey                                                                                                                               | 10+                                   | 10+    | 2,816       | 3,432  | 3                                           | Yes                                                        | Standard                                      |      |
| 78  | South Korea    | 2016       | Korea National Health and Nutrition Examination Survey                                                                                                                               | 10+                                   | 10+    | 3,004       | 3,790  | 3                                           | Yes                                                        | Standard                                      |      |
| 79  | Spain          | 1990       | Blood pressure in Spain: distribution, awareness, control, and benefits of a reduction in average pressure. Hypertension 1998; 32: 998-1002                                          | 35-65                                 | 35-65  | 810         | 1,211  | 3                                           | Yes                                                        | Random-zero                                   |      |
| 80  | Spain          | 2000-2001  | Influence of childhood socioeconomic circumstances, height, and obesity on pulse pressure and systolic and diastolic blood pressure in older people. J Hum Hypertens 2006; 20: 73-82 | 60+                                   | 60+    | 1,408       | 2,461  | 6                                           | Yes                                                        | Standard and Digital                          |      |
| 81  | Spain          | 2008-2010  | Study on Nutrition and Cardiovascular Risk in Spain (ENRICA)                                                                                                                         | 18+                                   | 18+    | 5,792       | 6,414  | 5                                           | Yes                                                        | Digital                                       |      |
| 82  | Spain          | 2015       | Study on Nutrition and Cardiovascular Risk in Spain (ENRICA)                                                                                                                         | 65+                                   | 65+    | 743         | 800    | 4                                           | Yes                                                        | Digital                                       |      |
| 83  | New Zealand    | 2008-2009  | New Zealand Adult Nutrition Survey                                                                                                                                                   | 15+                                   | 15+    | 1,949       | 2,396  | 3                                           | Yes                                                        | Digital                                       |      |
| 84  | New Zealand    | 2012-2013  | New Zealand Health Survey                                                                                                                                                            | 15+                                   | 15+    | 4,952       | 6,692  | 3                                           | Yes                                                        | Digital                                       | 2    |
| 85  | New Zealand    | 2013-2014  | New Zealand Health Survey                                                                                                                                                            | 18+                                   | 18+    | 5,307       | 6,692  | 3                                           | Yes                                                        | Digital                                       |      |
| 86  | New Zealand    | 2014-2015  | New Zealand Health Survey                                                                                                                                                            | 18+                                   | 18+    | 5,406       | 6,677  | 3                                           | Yes                                                        | Digital                                       |      |
| 87  | New Zealand    | 2015-2016  | New Zealand Health Survey                                                                                                                                                            | 18+                                   | 18+    | 5,469       | 6,801  | 3                                           | Yes                                                        | Digital                                       |      |
| 88  | United Kingdom | 1991-1992  | Health Survey for England                                                                                                                                                            | 16+                                   | 16+    | 2,951       | 3,319  | 3                                           | Yes                                                        | Digital                                       |      |
| 89  | United Kingdom | 1993       | Health Survey for England                                                                                                                                                            | 16+                                   | 16+    | 6,745       | 7,489  | 3                                           | Yes                                                        | Digital                                       |      |
| 90  | United Kingdom | 1994       | Health Survey for England                                                                                                                                                            | 16+                                   | 16+    | 6,223       | 7,178  | 3                                           | Yes                                                        | Digital                                       |      |
| 91  | United Kingdom | 1998       | Health Survey for England                                                                                                                                                            | 10+                                   | 10+    | 6,767       | 7,828  | 3                                           | Yes                                                        | Digital                                       |      |
| 92  | United Kingdom | 1999-2001  | British Women's Heart and Health Study                                                                                                                                               |                                       | 60-79  |             | 3,801  | 2                                           | Yes                                                        | Digital                                       |      |
| 93  | United Kingdom | 2001       | Health Survey for England                                                                                                                                                            | 10+                                   | 10+    | 6,156       | 7,191  | 3                                           | Yes                                                        | Digital                                       | 2    |
| 94  | United Kingdom | 2000-2001  | National Diet and Nutrition Survey                                                                                                                                                   | 19-64                                 | 19-64  | 797         | 939    | 3                                           | Yes                                                        | Digital                                       | 2    |
| 95  | United Kingdom | 2002       | Health Survey for England                                                                                                                                                            | 10+                                   | 10+    | 4,818       | 5,725  | 3                                           | Yes                                                        | Digital                                       | 2    |
| 96  | United Kingdom | 2003       | Health Survey for England                                                                                                                                                            | 10+                                   | 10+    | 5,566       | 6,683  | 3                                           | Yes                                                        | Digital                                       |      |
| 97  | United Kingdom | 2004-2005  | English Longitudinal Study of Ageing                                                                                                                                                 | 52+                                   | 52+    | 3,404       | 4,159  | 3                                           | Yes                                                        | Digital                                       |      |
| 98  | United Kingdom | 2005       | Health Survey for England                                                                                                                                                            | 10+                                   | 10+    | 3,518       | 4,239  | 3                                           | Yes                                                        | Digital                                       |      |
| 99  | United Kingdom | 2006       | Health Survey for England                                                                                                                                                            | 10+                                   | 10+    | 5,123       | 6,088  | 3                                           | Yes                                                        | Digital                                       |      |
| 100 | United Kingdom | 2007       | Health Survey for England                                                                                                                                                            | 10+                                   | 10+    | 2,427       | 2,879  | 3                                           | Yes                                                        | Digital                                       | 2    |
| 101 | United Kingdom | 2008       | Health Survey for England                                                                                                                                                            | 10+                                   | 10+    | 5,170       | 6,194  | 3                                           | Yes                                                        | Digital                                       | 2    |
| 102 | United Kingdom | 2009       | Health Survey for England                                                                                                                                                            | 10+                                   | 10+    | 1,450       | 1,733  | 3                                           | Yes                                                        | Digital                                       |      |
| 103 | United Kingdom | 2006-2010  | MRC National Survey of Health and Development                                                                                                                                        | 60-65                                 | 60-65  | 1,065       | 1,151  | 2                                           | Yes                                                        | Digital                                       |      |
| 104 | United Kingdom | 2010       | Health Survey for England                                                                                                                                                            | 10+                                   | 10+    | 2,611       | 3,283  | 3                                           | Yes                                                        | Digital                                       |      |
| 105 | United Kingdom | 2008-2012  | National Diet and Nutrition Survey                                                                                                                                                   | 10+                                   | 10+    | 1,037       | 1,241  | 3                                           | Yes                                                        | Digital                                       | 2    |
| 106 | United Kingdom | 2011       | Health Survey for England                                                                                                                                                            | 10+                                   | 10+    | 2,648       | 3,313  | 3                                           | Yes                                                        | Digital                                       |      |
| 107 | United Kingdom | 2012       | Health Survey for England                                                                                                                                                            | 10+                                   | 10+    | 2,548       | 3,196  | 3                                           | Yes                                                        | Digital                                       |      |
| 108 | United Kingdom | 2013       | Health Survey for England                                                                                                                                                            | 10+                                   | 10+    | 2,932       | 3,632  | 3                                           | Yes                                                        | Digital                                       |      |
| 109 | United Kingdom | 2014       | Health Survey for England                                                                                                                                                            | 10+                                   | 10+    | 2,657       | 3,168  | 3                                           | Yes                                                        | Digital                                       |      |
| 110 | United Kingdom | 2013-2014  | National Diet and Nutrition Survey                                                                                                                                                   | 10+                                   | 10+    | 623         | 844    | 3                                           | Yes                                                        | Digital                                       | 2    |

|     | Country                  | Data years | Survey/Study name/Citation                                       | Age range as in the NCD-RisC database |        | Sample size |        | Number of blood pressure measurements taken | Whether multiple cuff sizes were available for measurement | Type of device used to measure blood pressure | Note |
|-----|--------------------------|------------|------------------------------------------------------------------|---------------------------------------|--------|-------------|--------|---------------------------------------------|------------------------------------------------------------|-----------------------------------------------|------|
|     |                          |            |                                                                  | Male                                  | Female | Male        | Female |                                             |                                                            |                                               |      |
| 111 | United Kingdom           | 2015       | Health Survey for England                                        | 10+                                   | 10+    | 2,503       | 3,099  | 3                                           | Yes                                                        | Digital                                       |      |
| 112 | United Kingdom           | 2016       | Health Survey for England                                        | 10+                                   | 10+    | 2,311       | 2,880  | 3                                           | Yes                                                        | Digital                                       |      |
| 113 | United States of America | 1976-1980  | US National Health and Nutrition Examination Survey (NHANES) II  | 10-74                                 | 10-74  | 7,265       | 7,767  | 3                                           | No                                                         | Standard                                      |      |
| 114 | United States of America | 1988-1994  | US National Health and Nutrition Examination Survey (NHANES) III | 17+                                   | 17+    | 8,966       | 9,843  | 3                                           | Yes                                                        | Standard                                      |      |
| 115 | United States of America | 1999-2000  | US National Health and Nutrition Examination Survey (NHANES)     | 10+                                   | 10+    | 3,316       | 3,276  | 3                                           | Yes                                                        | Standard                                      |      |
| 116 | United States of America | 2001-2002  | US National Health and Nutrition Examination Survey (NHANES)     | 10+                                   | 10+    | 3,587       | 3,489  | 3                                           | Yes                                                        | Standard                                      |      |
| 117 | United States of America | 2003-2004  | US National Health and Nutrition Examination Survey (NHANES)     | 10+                                   | 10+    | 3,376       | 3,215  | 3                                           | Yes                                                        | Standard                                      |      |
| 118 | United States of America | 2005-2006  | US National Health and Nutrition Examination Survey (NHANES)     | 10+                                   | 10+    | 3,382       | 3,230  | 3                                           | Yes                                                        | Standard                                      |      |
| 119 | United States of America | 2007-2008  | US National Health and Nutrition Examination Survey (NHANES)     | 10+                                   | 10+    | 3,468       | 3,432  | 3                                           | Yes                                                        | Standard                                      |      |
| 120 | United States of America | 2009-2010  | US National Health and Nutrition Examination Survey (NHANES)     | 10+                                   | 10+    | 3,677       | 3,687  | 3                                           | Yes                                                        | Standard                                      |      |
| 121 | United States of America | 2011-2012  | US National Health and Nutrition Examination Survey (NHANES)     | 10+                                   | 10+    | 3,318       | 3,269  | 3                                           | Yes                                                        | Standard                                      |      |
| 122 | United States of America | 2013-2014  | US National Health and Nutrition Examination Survey (NHANES)     | 10+                                   | 10+    | 3,447       | 3,624  | 3                                           | Yes                                                        | Standard                                      |      |
| 123 | United States of America | 2015-2016  | US National Health and Nutrition Examination Survey (NHANES)     | 10+                                   | 10+    | 3,386       | 3,488  | 3                                           | Yes                                                        | Standard                                      |      |

1. The proportion of population living in urban areas in Australia from 1980 to 1989 was 85.5% according to the United Nations World Urbanization Prospects 2018 (<https://population.un.org/wup/>). Therefore we considered these studies as reasonably representative of the national population
2. Hypertension diagnosis information was not available in this survey.

**Appendix Table 3.** Age-specific prevalence of hypertension and rates of awareness, treatment, and control in women and men aged 40-79 years. Data are from the latest national survey in each country. Numbers in parentheses are the 95% confidence intervals.

| Country (years)           | Age group (years) | Hypertension Prevalence | Awareness     | Treatment     | Control       |
|---------------------------|-------------------|-------------------------|---------------|---------------|---------------|
| <b>Women</b>              |                   |                         |               |               |               |
| Australia (2012)          | 40-49             | 15% (11%-18%)           | 62% (49%-76%) | 43% (31%-56%) | 30% (17%-43%) |
|                           | 50-59             | 25% (21%-29%)           | 74% (68%-81%) | 62% (55%-69%) | 44% (35%-53%) |
|                           | 60-69             | 48% (44%-52%)           | 77% (72%-82%) | 69% (63%-75%) | 40% (34%-47%) |
|                           | 70-79             | 67% (61%-73%)           | 80% (76%-84%) | 73% (68%-79%) | 36% (28%-43%) |
| Canada (2016-2017)        | 40-49             | 13% (5%-21%)            | 74% (53%-96%) | 65% (42%-88%) | 62% (40%-83%) |
|                           | 50-59             | 38% (22%-53%)           | 64% (42%-86%) | 50% (34%-67%) | -*            |
|                           | 60-69             | 46% (40%-51%)           | 73% (58%-88%) | 72% (57%-86%) | 59% (43%-76%) |
|                           | 70-79             | 61% (49%-72%)           | 78% (67%-89%) | 76% (65%-88%) | 57% (42%-72%) |
| Finland (2017)            | 40-49             | 20% (17%-24%)           | 69% (60%-78%) | 42% (32%-52%) | 26% (17%-35%) |
|                           | 50-59             | 43% (39%-47%)           | 76% (71%-81%) | 51% (45%-57%) | 29% (23%-34%) |
|                           | 60-69             | 66% (62%-70%)           | 76% (72%-80%) | 58% (53%-63%) | 30% (26%-35%) |
|                           | 70-79             | 82% (79%-86%)           | 81% (77%-85%) | 71% (66%-76%) | 29% (24%-34%) |
| Germany (2008-2011)       | 40-49             | 17% (14%-21%)           | 80% (70%-89%) | 61% (50%-71%) | 52% (42%-63%) |
|                           | 50-59             | 34% (30%-39%)           | 82% (76%-88%) | 73% (66%-80%) | 56% (48%-64%) |
|                           | 60-69             | 61% (57%-66%)           | 91% (87%-94%) | 84% (80%-89%) | 64% (58%-70%) |
|                           | 70-79             | 75% (70%-79%)           | 91% (87%-94%) | 88% (84%-92%) | 57% (50%-63%) |
| Ireland (2009-2011) †     | 40-49             | 29% (16%-41%)           | 27% (4%-49%)  | 16% (0%-34%)  | 3% (0%-8%)    |
|                           | 50-59             | 39% (36%-42%)           | 58% (54%-62%) | 51% (46%-55%) | 31% (26%-35%) |
|                           | 60-69             | 53% (50%-56%)           | 65% (61%-69%) | 59% (55%-64%) | 34% (30%-39%) |
|                           | 70-79             | 71% (67%-75%)           | 75% (70%-79%) | 72% (67%-77%) | 33% (28%-39%) |
| Italy (2008-2012)         | 40-49             | 15% (13%-17%)           | 57% (50%-65%) | 36% (29%-44%) | 23% (17%-30%) |
|                           | 50-59             | 39% (36%-42%)           | 70% (66%-75%) | 59% (54%-64%) | 31% (27%-36%) |
|                           | 60-69             | 61% (58%-64%)           | 80% (77%-83%) | 72% (69%-76%) | 34% (31%-38%) |
|                           | 70-79             | 79% (76%-82%)           | 83% (80%-86%) | 78% (75%-81%) | 29% (25%-32%) |
| Japan (2015) <sup>Δ</sup> | 40-49             | 16% (12%-19%)           | 43% (28%-57%) | 26% (14%-38%) | 13% (5%-21%)  |
|                           | 50-59             | 33% (28%-38%)           | 54% (45%-63%) | 39% (30%-49%) | 18% (11%-26%) |
|                           | 60-69             | 47% (43%-51%)           | 68% (63%-73%) | 56% (49%-62%) | 30% (24%-36%) |
|                           | 70-79             | 69% (65%-74%)           | 77% (72%-82%) | 71% (65%-76%) | 37% (30%-44%) |
| New Zealand (2015-2016)   | 40-49             | 20% (17%-22%)           | 65% (57%-72%) | 45% (37%-52%) | 20% (14%-27%) |
|                           | 50-59             | 38% (34%-42%)           | 73% (68%-78%) | 56% (51%-62%) | 34% (28%-40%) |
|                           | 60-69             | 54% (50%-58%)           | 76% (71%-80%) | 66% (61%-71%) | 35% (31%-40%) |
|                           | 70-79             | 67% (63%-71%)           | 83% (80%-87%) | 75% (70%-80%) | 44% (39%-49%) |
| South Korea (2016)        | 40-49             | 12% (9%-15%)            | 49% (36%-62%) | 45% (32%-58%) | 39% (27%-52%) |
|                           | 50-59             | 31% (27%-35%)           | 72% (65%-79%) | 70% (63%-77%) | 48% (41%-56%) |
|                           | 60-69             | 46% (41%-51%)           | 80% (74%-85%) | 79% (73%-85%) | 56% (49%-64%) |
|                           | 70-79             | 72% (68%-77%)           | 86% (81%-92%) | 85% (79%-90%) | 59% (52%-66%) |



| Country (years)           | Age group (years) | Hypertension Prevalence | Awareness      | Treatment      | Control       |
|---------------------------|-------------------|-------------------------|----------------|----------------|---------------|
| Spain (2015) ‡            | 40-49             | 16% (14%-19%)           | 55% (47%-63%)  | 40% (32%-48%)  | 23% (17%-29%) |
|                           | 50-59             | 33% (30%-37%)           | 66% (60%-72%)  | 51% (44%-58%)  | 33% (27%-40%) |
|                           | 60-69             | 49% (41%-56%)           | 73% (63%-82%)  | 62% (52%-72%)  | 31% (21%-40%) |
|                           | 70-79             | 63% (59%-67%)           | 74% (69%-79%)  | 63% (57%-68%)  | 26% (21%-31%) |
| UK (2016)                 | 40-49             | 17% (14%-21%)           | 58% (44%-71%)  | 46% (33%-59%)  | 36% (23%-49%) |
|                           | 50-59             | 28% (23%-32%)           | 63% (53%-73%)  | 53% (43%-64%)  | 35% (25%-46%) |
|                           | 60-69             | 47% (42%-51%)           | 71% (64%-78%)  | 58% (51%-66%)  | 39% (30%-47%) |
|                           | 70-79             | 64% (58%-69%)           | 80% (75%-86%)  | 70% (63%-77%)  | 38% (31%-45%) |
| USA (2015-2016)           | 40-49             | 20% (14%-26%)           | 78% (65%-91%)  | 67% (54%-81%)  | 49% (36%-61%) |
|                           | 50-59             | 39% (34%-44%)           | 86% (79%-94%)  | 79% (71%-87%)  | 56% (48%-64%) |
|                           | 60-69             | 59% (52%-67%)           | 89% (83%-95%)  | 83% (74%-93%)  | 61% (51%-72%) |
|                           | 70-79             | 73% (67%-79%)           | 86% (81%-91%)  | 84% (79%-89%)  | 44% (38%-51%) |
| <b>Men</b>                |                   |                         |                |                |               |
| Australia (2012)          | 40-49             | 20% (15%-26%)           | 51% (40%-62%)  | 32% (19%-46%)  | 25% (12%-37%) |
|                           | 50-59             | 36% (31%-42%)           | 67% (60%-73%)  | 51% (45%-57%)  | 29% (22%-36%) |
|                           | 60-69             | 54% (49%-59%)           | 72% (67%-77%)  | 62% (56%-68%)  | 30% (23%-36%) |
|                           | 70-79             | 66% (61%-71%)           | 73% (68%-79%)  | 68% (61%-74%)  | 30% (23%-37%) |
| Canada (2016-2017)        | 40-49             | 10% (4%-16%)            | 90% (74%-100%) | 71% (52%-89%)  | 62% (43%-81%) |
|                           | 50-59             | 28% (18%-37%)           | 74% (53%-94%)  | 72% (52%-93%)  | 63% (38%-87%) |
|                           | 60-69             | 53% (47%-58%)           | 88% (74%-100%) | 87% (74%-100%) | 72% (59%-86%) |
|                           | 70-79             | 62% (53%-70%)           | 86% (80%-91%)  | 85% (80%-91%)  | 71% (61%-81%) |
| Finland (2017)            | 40-49             | 37% (33%-42%)           | 69% (62%-76%)  | 28% (21%-35%)  | 14% (8%-19%)  |
|                           | 50-59             | 56% (52%-60%)           | 72% (67%-77%)  | 52% (46%-58%)  | 22% (17%-27%) |
|                           | 60-69             | 70% (67%-74%)           | 76% (71%-80%)  | 61% (57%-66%)  | 31% (27%-36%) |
|                           | 70-79             | 76% (71%-80%)           | 79% (74%-84%)  | 71% (66%-77%)  | 32% (27%-38%) |
| Germany (2008-2011)       | 40-49             | 26% (22%-31%)           | 67% (58%-77%)  | 45% (34%-55%)  | 24% (17%-32%) |
|                           | 50-59             | 42% (38%-47%)           | 78% (73%-84%)  | 62% (55%-69%)  | 43% (37%-50%) |
|                           | 60-69             | 59% (54%-64%)           | 88% (84%-92%)  | 80% (76%-85%)  | 60% (53%-67%) |
|                           | 70-79             | 74% (69%-78%)           | 88% (84%-93%)  | 84% (78%-89%)  | 59% (52%-65%) |
| Ireland (2009-2011) †     | 40-49             | 51% (39%-63%)           | 25% (10%-40%)  | 17% (5%-29%)   | 1% (0%-3%)    |
|                           | 50-59             | 51% (48%-54%)           | 50% (45%-54%)  | 40% (36%-44%)  | 20% (17%-24%) |
|                           | 60-69             | 64% (61%-68%)           | 57% (53%-61%)  | 52% (48%-56%)  | 27% (23%-30%) |
|                           | 70-79             | 69% (65%-73%)           | 67% (62%-72%)  | 63% (58%-69%)  | 31% (26%-36%) |
| Italy (2008-2012)         | 40-49             | 35% (32%-38%)           | 51% (46%-56%)  | 27% (23%-32%)  | 9% (6%-12%)   |
|                           | 50-59             | 55% (52%-58%)           | 68% (64%-72%)  | 51% (47%-55%)  | 20% (17%-24%) |
|                           | 60-69             | 70% (67%-72%)           | 76% (73%-79%)  | 68% (65%-71%)  | 32% (29%-35%) |
|                           | 70-79             | 77% (74%-80%)           | 78% (75%-81%)  | 73% (70%-77%)  | 29% (26%-33%) |
| Japan (2015) <sup>Δ</sup> | 40-49             | 35% (29%-42%)           | 41% (28%-54%)  | 29% (19%-40%)  | 10% (3%-18%)  |
|                           | 50-59             | 55% (47%-63%)           | 65% (57%-72%)  | 50% (40%-60%)  | 22% (14%-31%) |
|                           | 60-69             | 68% (64%-72%)           | 71% (66%-76%)  | 52% (46%-58%)  | 23% (18%-29%) |
|                           | 70-79             | 72% (67%-76%)           | 77% (72%-81%)  | 71% (66%-77%)  | 37% (31%-43%) |

| Country (years)         | Age group (years) | Hypertension Prevalence | Awareness     | Treatment     | Control       |
|-------------------------|-------------------|-------------------------|---------------|---------------|---------------|
| New Zealand (2015-2016) | 40-49             | 29% (25%-32%)           | 50% (42%-57%) | 30% (23%-36%) | 14% (9%-19%)  |
|                         | 50-59             | 38% (34%-42%)           | 69% (63%-75%) | 50% (44%-56%) | 26% (21%-32%) |
|                         | 60-69             | 62% (58%-66%)           | 74% (69%-78%) | 62% (57%-67%) | 31% (26%-35%) |
|                         | 70-79             | 66% (61%-71%)           | 77% (72%-82%) | 71% (66%-77%) | 38% (32%-44%) |
| South Korea (2016)      | 40-49             | 31% (26%-35%)           | 40% (31%-48%) | 33% (25%-41%) | 21% (14%-28%) |
|                         | 50-59             | 42% (37%-47%)           | 66% (59%-73%) | 62% (54%-69%) | 40% (32%-48%) |
|                         | 60-69             | 56% (50%-62%)           | 85% (80%-90%) | 83% (78%-88%) | 65% (59%-72%) |
|                         | 70-79             | 65% (59%-71%)           | 90% (86%-94%) | 87% (83%-92%) | 62% (54%-69%) |
| Spain (2015) †          | 40-49             | 33% (30%-36%)           | 46% (40%-52%) | 27% (22%-32%) | 14% (10%-17%) |
|                         | 50-59             | 55% (51%-60%)           | 63% (58%-68%) | 47% (42%-53%) | 25% (20%-30%) |
|                         | 60-69             | 72% (66%-77%)           | 72% (65%-79%) | 62% (55%-69%) | 30% (23%-36%) |
|                         | 70-79             | 69% (65%-74%)           | 74% (69%-79%) | 69% (63%-74%) | 30% (25%-36%) |
| UK (2016)               | 40-49             | 20% (16%-25%)           | 58% (44%-73%) | 36% (22%-51%) | 27% (13%-41%) |
|                         | 50-59             | 39% (34%-44%)           | 60% (51%-70%) | 45% (36%-55%) | 28% (19%-36%) |
|                         | 60-69             | 53% (48%-58%)           | 66% (58%-73%) | 59% (51%-66%) | 38% (31%-45%) |
|                         | 70-79             | 63% (57%-68%)           | 81% (75%-86%) | 73% (67%-79%) | 51% (44%-59%) |
| USA (2015-2016)         | 40-49             | 32% (25%-40%)           | 68% (59%-76%) | 56% (48%-65%) | 44% (36%-52%) |
|                         | 50-59             | 44% (36%-52%)           | 80% (71%-88%) | 63% (54%-73%) | 48% (38%-57%) |
|                         | 60-69             | 57% (51%-62%)           | 82% (73%-92%) | 78% (69%-87%) | 52% (43%-62%) |
|                         | 70-79             | 55% (45%-65%)           | 88% (82%-94%) | 84% (77%-91%) | 53% (41%-65%) |

\* Hypertension control rate for women aged 50-59 years in Canada in 2016-2017 was unavailable due to Canadian regulations on releasing data on outcomes with small numbers.

† The latest national survey in Ireland had data for 50 to 79 years; data from an earlier survey in 2007 were used for 40 to 49 years.

‡ The latest national survey in Spain had data for 60 to 79 years; data from an earlier survey in 2009 were used for 40 to 59 years.

△ The question on awareness was not asked in 2015 in Japan; awareness data from 2010 were used.

**Appendix Table 4.** Change in hypertension prevalence since 2005 by country, sex and age group.

| Country                  | Age group (years) | Women                                           |                   | Men                                             |                   |
|--------------------------|-------------------|-------------------------------------------------|-------------------|-------------------------------------------------|-------------------|
|                          |                   | Average change * (percentage points per decade) | p-value for trend | Average change * (percentage points per decade) | p-value for trend |
| Australia                | 40-49             | +10.7                                           | 0.4172            | +8.1                                            | 0.4347            |
|                          | 50-59             | +4.7                                            | 0.7824            | +16.4                                           | 0.4466            |
|                          | 60-69             | +11.2                                           | 0.5318            | +10.5                                           | 0.4264            |
|                          | 70-79             | +7.0                                            | 0.6690            | +8.7                                            | 0.5779            |
| Canada                   | 40-49             | +1.9                                            | 0.5506            | -8.1                                            | 0.2683            |
|                          | 50-59             | +15.5                                           | 0.0976            | +1.5                                            | 0.8749            |
|                          | 60-69             | -4.3                                            | 0.6128            | -2.2                                            | 0.7999            |
|                          | 70-79             | +2.7                                            | 0.6117            | +2.5                                            | 0.7805            |
| Finland                  | 40-49             | -7.0                                            | 0.3363            | -7.8                                            | 0.5444            |
|                          | 50-59             | -6.7                                            | 0.2249            | -2.2                                            | 0.6832            |
|                          | 60-69             | -8.1                                            | 0.2415            | -5.0                                            | 0.5978            |
|                          | 70-79             | +5.4                                            | 0.4828            | +0.6                                            | 0.9427            |
| Japan                    | 40-49             | -4.1                                            | 0.0615            | -5.0                                            | 0.2245            |
|                          | 50-59             | -7.9                                            | 0.0033            | +5.3                                            | 0.2464            |
|                          | 60-69             | -3.4                                            | 0.3346            | +5.2                                            | 0.0197            |
|                          | 70-79             | -2.6                                            | 0.2498            | -2.9                                            | 0.3533            |
| New Zealand              | 40-49             | -0.1                                            | 0.9781            | +0.8                                            | 0.8630            |
|                          | 50-59             | +1.0                                            | 0.8243            | -14.5                                           | 0.0344            |
|                          | 60-69             | +1.8                                            | 0.7224            | +3.2                                            | 0.0660            |
|                          | 70-79             | -13.4                                           | 0.0595            | +2.5                                            | 0.4636            |
| South Korea              | 40-49             | +0.1                                            | 0.9633            | +5.7                                            | 0.0679            |
|                          | 50-59             | -5.8                                            | 0.0147            | -0.1                                            | 0.9587            |
|                          | 60-69             | -2.4                                            | 0.5040            | +3.7                                            | 0.4104            |
|                          | 70-79             | +6.7                                            | 0.0224            | +16.3                                           | 0.0002            |
| United Kingdom           | 40-49             | -3.1                                            | 0.2298            | -2.7                                            | 0.2938            |
|                          | 50-59             | -6.4                                            | 0.0143            | -0.7                                            | 0.8368            |
|                          | 60-69             | -3.6                                            | 0.2942            | -5.5                                            | 0.0761            |
|                          | 70-79             | -4.8                                            | 0.1857            | -1.1                                            | 0.7471            |
| United States of America | 40-49             | -0.7                                            | 0.7933            | +4.4                                            | 0.3428            |
|                          | 50-59             | -3.3                                            | 0.2196            | +6.3                                            | 0.0783            |
|                          | 60-69             | -3.5                                            | 0.2908            | -3.6                                            | 0.2948            |
|                          | 70-79             | +0.5                                            | 0.8871            | -5.9                                            | 0.4611            |

\* Average change is reported by fitting a linear regression for each age group and sex to the data in countries with more than three surveys since 2005.

**Appendix Table 5.** Changes in hypertension awareness, treatment, and control since 2005 by country, sex and age group.

| Country                  | Age group (years) | Women                                           |                   | Men                                             |                   |
|--------------------------|-------------------|-------------------------------------------------|-------------------|-------------------------------------------------|-------------------|
|                          |                   | Average change * (percentage points per decade) | p-value for trend | Average change * (percentage points per decade) | p-value for trend |
| <b>Awareness</b>         |                   |                                                 |                   |                                                 |                   |
| Australia                | 40-49             | -                                               | -                 | -                                               | -                 |
|                          | 50-59             | -                                               | -                 | -                                               | -                 |
|                          | 60-69             | -                                               | -                 | -                                               | -                 |
|                          | 70-79             | -                                               | -                 | -                                               | -                 |
| Canada                   | 40-49             | -                                               | -                 | -0.9                                            | 0.9773            |
|                          | 50-59             | -                                               | -                 | -6.8                                            | 0.0478            |
|                          | 60-69             | -13.9                                           | 0.1870            | +2.8                                            | 0.6275            |
|                          | 70-79             | -8.3                                            | 0.1868            | -3.3                                            | 0.4136            |
| Finland                  | 40-49             | -3.3                                            | 0.8631            | +9.8                                            | 0.6899            |
|                          | 50-59             | +4.0                                            | 0.7744            | +4.6                                            | 0.8492            |
|                          | 60-69             | +1.1                                            | 0.8884            | +0.5                                            | 0.9542            |
|                          | 70-79             | +4.8                                            | 0.6846            | +10.9                                           | 0.1069            |
| Japan                    | 40-49             | -                                               | -                 | -                                               | -                 |
|                          | 50-59             | -                                               | -                 | -                                               | -                 |
|                          | 60-69             | -                                               | -                 | -                                               | -                 |
|                          | 70-79             | -                                               | -                 | -                                               | -                 |
| New Zealand              | 40-49             | +9.1                                            | 0.4290            | -0.7                                            | 0.9490            |
|                          | 50-59             | -1.8                                            | 0.8742            | +22.0                                           | 0.1816            |
|                          | 60-69             | +1.4                                            | 0.8580            | +9.5                                            | 0.1900            |
|                          | 70-79             | +8.4                                            | 0.2845            | +5.8                                            | 0.3593            |
| South Korea              | 40-49             | -1.6                                            | 0.8323            | -2.0                                            | 0.7668            |
|                          | 50-59             | -6.7                                            | 0.2037            | -2.8                                            | 0.6181            |
|                          | 60-69             | -1.2                                            | 0.7098            | +13.7                                           | 0.0154            |
|                          | 70-79             | +11.7                                           | 0.0006            | +20.4                                           | 0.0001            |
| United Kingdom           | 40-49             | -1.1                                            | 0.8608            | +9.8                                            | 0.2572            |
|                          | 50-59             | +10.1                                           | 0.0973            | +7.7                                            | 0.2574            |
|                          | 60-69             | +1.3                                            | 0.7887            | +6.3                                            | 0.2578            |
|                          | 70-79             | +9.3                                            | 0.0723            | +14.4                                           | 0.0421            |
| United States of America | 40-49             | -3.9                                            | 0.6437            | -3.7                                            | 0.5945            |
|                          | 50-59             | -1.3                                            | 0.6780            | +9.5                                            | 0.1553            |
|                          | 60-69             | +8.3                                            | 0.0561            | +0.5                                            | 0.8788            |
|                          | 70-79             | +4.6                                            | 0.2094            | +0.4                                            | 0.8197            |

\* Average change is reported by fitting a linear regression for each age group and sex to the data in countries with more than three surveys since 2005.

**Appendix Table 5. (Continued)**

| Country                  | Age group (years) | Women                                           |                   | Men                                             |                   |
|--------------------------|-------------------|-------------------------------------------------|-------------------|-------------------------------------------------|-------------------|
|                          |                   | Average change * (percentage points per decade) | p-value for trend | Average change * (percentage points per decade) | p-value for trend |
| <b>Treatment</b>         |                   |                                                 |                   |                                                 |                   |
| Australia                | 40-49             | -                                               | -                 | -                                               | -                 |
|                          | 50-59             | -                                               | -                 | -                                               | -                 |
|                          | 60-69             | -                                               | -                 | -                                               | -                 |
|                          | 70-79             | -                                               | -                 | -                                               | -                 |
| Canada                   | 40-49             | -                                               | -                 | -0.7                                            | 0.9727            |
|                          | 50-59             | -                                               | -                 | -3.7                                            | 0.3544            |
|                          | 60-69             | -16.7                                           | 0.0845            | +3.1                                            | 0.5853            |
|                          | 70-79             | -9.3                                            | 0.1964            | -3.1                                            | 0.4189            |
| Finland                  | 40-49             | +11.1                                           | 0.6558            | +6.3                                            | 0.7560            |
|                          | 50-59             | +6.7                                            | 0.3251            | +12.3                                           | 0.2028            |
|                          | 60-69             | +3.5                                            | 0.5108            | +4.5                                            | 0.1072            |
|                          | 70-79             | +11.4                                           | 0.0120            | +15.9                                           | 0.0909            |
| Japan                    | 40-49             | +7.5                                            | 0.0631            | +9.0                                            | 0.0790            |
|                          | 50-59             | +5.5                                            | 0.2184            | +10.9                                           | 0.0166            |
|                          | 60-69             | +2.2                                            | 0.5361            | +4.6                                            | 0.1755            |
|                          | 70-79             | +8.4                                            | 0.0236            | +10.3                                           | 0.0104            |
| New Zealand              | 40-49             | -2.9                                            | 0.8020            | +11.9                                           | 0.4025            |
|                          | 50-59             | +3.4                                            | 0.6118            | +9.8                                            | 0.0859            |
|                          | 60-69             | -7.3                                            | 0.4713            | +10.2                                           | 0.0425            |
|                          | 70-79             | +3.5                                            | 0.3749            | +4.0                                            | 0.5700            |
| South Korea              | 40-49             | +0.3                                            | 0.9727            | +5.0                                            | 0.4800            |
|                          | 50-59             | -0.2                                            | 0.9613            | +2.0                                            | 0.7331            |
|                          | 60-69             | +1.9                                            | 0.5883            | +17.7                                           | 0.0049            |
|                          | 70-79             | +14.6                                           | 0.0002            | +22.0                                           | 0.0001            |
| United Kingdom           | 40-49             | +1.0                                            | 0.9264            | +12.1                                           | 0.1453            |
|                          | 50-59             | +9.9                                            | 0.0225            | +8.8                                            | 0.0609            |
|                          | 60-69             | +2.3                                            | 0.5399            | +3.5                                            | 0.5167            |
|                          | 70-79             | +10.6                                           | 0.0536            | +16.0                                           | 0.0116            |
| United States of America | 40-49             | +3.0                                            | 0.7523            | -1.3                                            | 0.8859            |
|                          | 50-59             | -1.0                                            | 0.8729            | +4.7                                            | 0.4645            |
|                          | 60-69             | +8.2                                            | 0.0257            | -0.7                                            | 0.7926            |
|                          | 70-79             | +5.4                                            | 0.1107            | +0.9                                            | 0.7992            |

\* Average change is reported by fitting a linear regression for each age group and sex to the data in countries with more than three surveys since 2005.

**Appendix Table 5. (Continued)**

| Country                  | Age group (years) | Women                                           |                   | Men                                             |                   |
|--------------------------|-------------------|-------------------------------------------------|-------------------|-------------------------------------------------|-------------------|
|                          |                   | Average change * (percentage points per decade) | p-value for trend | Average change * (percentage points per decade) | p-value for trend |
| <b>Control</b>           |                   |                                                 |                   |                                                 |                   |
| Australia                | 40-49             | -                                               | -                 | -                                               | -                 |
|                          | 50-59             | -                                               | -                 | -                                               | -                 |
|                          | 60-69             | -                                               | -                 | -                                               | -                 |
|                          | 70-79             | -                                               | -                 | -                                               | -                 |
| Canada                   | 40-49             | -22.9                                           | 0.3961            | +2.7                                            | 0.9225            |
|                          | 50-59             | -19.0                                           | 0.3969            | -5.1                                            | 0.4778            |
|                          | 60-69             | -11.3                                           | 0.2174            | -2.0                                            | 0.7146            |
|                          | 70-79             | +8.8                                            | 0.0958            | +0.3                                            | 0.9646            |
| Finland                  | 40-49             | +8.1                                            | 0.7438            | +2.8                                            | 0.8939            |
|                          | 50-59             | +10.0                                           | 0.3502            | +9.0                                            | 0.0059            |
|                          | 60-69             | +12.6                                           | 0.0966            | +14.3                                           | 0.0222            |
|                          | 70-79             | +14.2                                           | 0.0123            | +19.9                                           | 0.1308            |
| Japan                    | 40-49             | +8.2                                            | 0.0708            | +6.6                                            | 0.0995            |
|                          | 50-59             | +9.7                                            | 0.0173            | +10.2                                           | 0.0046            |
|                          | 60-69             | +10.4                                           | 0.0101            | +10.6                                           | 0.0010            |
|                          | 70-79             | +15.5                                           | 0.0003            | +14.8                                           | 0.0007            |
| New Zealand              | 40-49             | +4.3                                            | 0.3728            | +6.3                                            | 0.3998            |
|                          | 50-59             | +4.3                                            | 0.0546            | +5.6                                            | 0.2252            |
|                          | 60-69             | -9.1                                            | 0.4045            | -2.5                                            | 0.4526            |
|                          | 70-79             | +10.8                                           | 0.1312            | -1.8                                            | 0.8880            |
| South Korea              | 40-49             | +6.6                                            | 0.5161            | +5.9                                            | 0.3074            |
|                          | 50-59             | +3.6                                            | 0.3327            | +2.2                                            | 0.7369            |
|                          | 60-69             | +6.5                                            | 0.3497            | +23.9                                           | 0.0016            |
|                          | 70-79             | +17.7                                           | 0.0031            | +31.2                                           | 0.0019            |
| United Kingdom           | 40-49             | +5.6                                            | 0.5257            | +11.7                                           | 0.0689            |
|                          | 50-59             | +10.3                                           | 0.0214            | +12.6                                           | 0.0115            |
|                          | 60-69             | +9.6                                            | 0.0015            | +6.8                                            | 0.1039            |
|                          | 70-79             | +13.2                                           | 0.0057            | +18.8                                           | 0.0007            |
| United States of America | 40-49             | +3.9                                            | 0.6743            | +6.6                                            | 0.3342            |
|                          | 50-59             | +7.8                                            | 0.4159            | +4.4                                            | 0.4174            |
|                          | 60-69             | +13.2                                           | 0.0612            | +1.2                                            | 0.6719            |
|                          | 70-79             | -2.8                                            | 0.7591            | -1.5                                            | 0.7802            |

\* Average change is reported by fitting a linear regression for each age group and sex to the data in countries with more than three surveys since 2005.

**Appendix Table 6.** Current and past clinical guidelines for hypertension in the 12 countries included in the analysis.

| Guideline        | Year | Threshold for immediate treatment                                                                         | Initiating treatment based on CVD risk                                                                                                                                                                                                                          | Lifestyle modifications before initiating treatment <sup>†</sup>                                                                                                                                                                        | Treatment target range (no other complications) <sup>‡</sup> | First line treatment                                                                   | Note                                                                            |
|------------------|------|-----------------------------------------------------------------------------------------------------------|-----------------------------------------------------------------------------------------------------------------------------------------------------------------------------------------------------------------------------------------------------------------|-----------------------------------------------------------------------------------------------------------------------------------------------------------------------------------------------------------------------------------------|--------------------------------------------------------------|----------------------------------------------------------------------------------------|---------------------------------------------------------------------------------|
| <b>Australia</b> |      |                                                                                                           |                                                                                                                                                                                                                                                                 |                                                                                                                                                                                                                                         |                                                              |                                                                                        |                                                                                 |
| NHFA             | 2004 | BP ≥180/110                                                                                               | BP of 140-179/90-109 with associated clinical conditions, target organ disease, 5-year CVD risk ≥10%: (depending on risk) after lifestyle modifications<br><br>BP of 150-179/95-109 with 5-year CVD risk <10%: consider treatment after lifestyle modifications | BP of 140-179/90-109 with 5-year CVD risk <15%: for 3-12 months                                                                                                                                                                         | BP <140/90 for ≥65 years<br>BP <130/85 for <65 years         | Thiazide diuretic, beta-blocker, ACEI, CCB or ARB                                      | Emphasised the role of lifestyle modifications as first-line intervention       |
| NHFA             | 2008 | BP ≥180/110, or SBP ≥160 and DBP ≤70<br><br>BP ≥150/90, (depending on risk) after lifestyle modifications | regardless of BP with associated clinical conditions or end-organ damage<br><br>BP of 140-149 and DBP <90 with 5-year CVD risk ≥10% after lifestyle modifications                                                                                               | BP of 140-179/90-109 with 5-year CVD risk ≤15%: for 3-12 months                                                                                                                                                                         | BP <140/90                                                   | ACEI, ARB, CCB, or thiazide diuretic (≥65 years only)                                  | Treatment recommendation is first stratified by CVD risk then by blood pressure |
| NHFA             | 2016 | BP ≥160/100                                                                                               | regardless of BP with 5-year CVD risk >15%, or ≥10% with family history of premature CVD or aboriginal/Torres Strait Islander<br><br>BP of 140-159/90-99 with 5-year CVD risk ≥10%                                                                              | BP of 130-139/85-89 with 5-year CVD risk 10-15%, no family history of premature CVD and not aboriginal/Torres Strait Islander: for 6 months then review BP<br><br>SBP of 140-159 with 5-year CVD risk <10%: for 2 months then review BP | BP <140/90                                                   | ACEI, ARB, CCB, thiazide diuretic<br><br>combination therapy for BP >20/10 over target | Treatment recommendation is first stratified by CVD risk then by blood pressure |
| <b>Canada</b>    |      |                                                                                                           |                                                                                                                                                                                                                                                                 |                                                                                                                                                                                                                                         |                                                              |                                                                                        |                                                                                 |
| CHS              | 1977 | DBP ≥105                                                                                                  | DBP of 90-104: based on clinical judgement                                                                                                                                                                                                                      | No recommendation                                                                                                                                                                                                                       | DBP <90                                                      | Not clearly recommended                                                                | None                                                                            |



| Guideline         | Year | Threshold for immediate treatment                                            | Initiating treatment based on CVD risk                                                                                                      | Lifestyle modifications before initiating treatment <sup>†</sup> | Treatment target range (no other complications) <sup>‡</sup> | First line treatment                                                                                             | Note                                                                                  |
|-------------------|------|------------------------------------------------------------------------------|---------------------------------------------------------------------------------------------------------------------------------------------|------------------------------------------------------------------|--------------------------------------------------------------|------------------------------------------------------------------------------------------------------------------|---------------------------------------------------------------------------------------|
| CHS               | 1984 | DBP $\geq 100$                                                               | DBP of 90-99 with target organ damage<br><br>DBP of 90-99 with no target organ damage, with other risk factors: based on clinical judgement | No recommendation                                                | DBP <90                                                      | Thiazide diuretic, beta-blocker                                                                                  | None                                                                                  |
| CHS (elderly)     | 1986 | BP $\geq 200/100$ for 65-74 years<br><br>DBP $\geq 120$ for $\geq 75$ years  | BP $\geq 180/90$ with target organ damage (for 65-74 years)<br><br>BP $\geq 180/100$ with target organ damage (for $\geq 75$ years)         | No recommendation                                                | Reduce BP by 30/10-15                                        | Thiazide diuretic                                                                                                | None                                                                                  |
| CHS               | 1993 | DBP $\geq 100$<br><br>SBP $\geq 160$ and DBP <90 for $\geq 60$ years         | DBP of 90-99 with target organ damage<br><br>BP of 140-159/90-99 with no target organ damage: based on clinical judgement                   | No recommendation                                                | DBP <90                                                      | Thiazide diuretic, beta-blocker                                                                                  | None                                                                                  |
| CHEP <sup>Δ</sup> | 1999 | BP $\geq 160/100$ for <60 years<br><br>BP $\geq 160/105$ for $\geq 60$ years | BP $\geq 140/90$ with target-organ damage, diabetes, renal disease, or CVD                                                                  | No recommendation                                                | BP <140/90                                                   | Thiazide diuretic, beta-blocker or ACEI                                                                          | Combination therapy should be used if there is only a partial response to monotherapy |
| CHEP <sup>Δ</sup> | 2008 | BP $\geq 160/100$                                                            | BP of 140-159/90-109 with macrovascular target organ damage (or other independent risk factors when DBP of 90-109)                          | No recommendation                                                | BP <140/90                                                   | Thiazide diuretic, beta-blocker, ACEI, CCB, or ARB<br><br>Two agents if BP is 20/10 above target                 | None                                                                                  |
| CHEP <sup>Δ</sup> | 2009 | BP $\geq 160/100$                                                            | BP of 140-159/90-109 with macrovascular target organ damage (or other independent risk factors when DBP of 90-109)                          | No recommendation                                                | BP <140/90                                                   | Thiazide diuretic, beta-blocker (for <60 years), ACEI, CCB, or ARB<br><br>Two agents if BP is 20/10 above target | None                                                                                  |

| Guideline         | Year | Threshold for immediate treatment                                       | Initiating treatment based on CVD risk                                                                   | Lifestyle modifications before initiating treatment <sup>†</sup>                                                                 | Treatment target range (no other complications) <sup>‡</sup>      | First line treatment                                                                                                                                                                                         | Note |
|-------------------|------|-------------------------------------------------------------------------|----------------------------------------------------------------------------------------------------------|----------------------------------------------------------------------------------------------------------------------------------|-------------------------------------------------------------------|--------------------------------------------------------------------------------------------------------------------------------------------------------------------------------------------------------------|------|
| CHEP <sup>Δ</sup> | 2015 | BP ≥160/100<br><br>SBP ≥160 for ≥80 years                               | BP of 140-159/90-109 with macrovascular target organ damage, diabetes, or other independent risk factors | No recommendation                                                                                                                | BP <140/90<br><br>SBP <150 in very elderly (≥80 years)            | Thiazide diuretic, beta-blocker (for <60 years), ACEI, CCB, or ARB<br><br>Two agents if BP is 20/10 above target                                                                                             | None |
| HC                | 2018 | BP ≥160/100                                                             | BP of 140-159/90-109 with macrovascular target organ damage or other independent risk factors            | No recommendation                                                                                                                | BP <140/90                                                        | Monotherapy with thiazide or thiazide-like diuretic, beta-blocker (for <60 years), ARB, CCB or ACEI (for non-black)<br><br>Single-pill-combination of ACEI with CCB, ARB with CCB, or ACEI/ARB with diuretic | None |
| <b>Finland</b>    |      |                                                                         |                                                                                                          |                                                                                                                                  |                                                                   |                                                                                                                                                                                                              |      |
| FMSD/FHS          | 2002 | BP ≥180/110<br><br>BP of 160-179/100-109, after lifestyle modifications | BP ≥140/90 with 10-year CVD risk ≥20%: after lifestyle modifications                                     | BP of 160-179/100-109: for 1 month                                                                                               | BP <140/85                                                        | Diuretic, beta-blocker, ACEI                                                                                                                                                                                 | None |
| FMSD/FHS          | 2005 | BP ≥180/110<br><br>BP ≥160-179/100-109, lifestyle modifications         | BP ≥140/90 with 10-year CVD risk ≥20%: after lifestyle modifications                                     | BP of 160-179/100-109: for 1 month                                                                                               | BP <140/85                                                        | ACEI, ARB, diuretic, CCB, beta-blocker                                                                                                                                                                       | None |
| FMSD/FHS          | 2014 | BP ≥180/110<br><br>BP of 140-179/90-109, after lifestyle modifications  | No recommendation                                                                                        | BP of 140-179/90-109: for 1-2 months                                                                                             | BP <140/90                                                        | ACEI, ARB, diuretic, CCB                                                                                                                                                                                     | None |
| <b>Japan</b>      |      |                                                                         |                                                                                                          |                                                                                                                                  |                                                                   |                                                                                                                                                                                                              |      |
| MoH/JMA           | 1990 | DBP ≥115<br>DBP of 90-114, after lifestyle modifications                | No recommendation                                                                                        | DBP of 90-104 without organ damage: for 1-3 months<br><br>DBP of 105-114, SBP ≥160, or DBP ≥90 and SBP of 170-180 in the elderly | DBP <90, SBP of 140-160 for 60-69 years and 160-180 for ≥70 years | CCB, ACEI, diuretic, beta-blocker, alpha-blocker                                                                                                                                                             | None |

| Guideline          | Year | Threshold for immediate treatment                                                                                                                                                                    | Initiating treatment based on CVD risk                                                                                                                                                          | Lifestyle modifications before initiating treatment <sup>†</sup>           | Treatment target range (no other complications) <sup>‡</sup>                                                                              | First line treatment                                                                       | Note                                                                             |
|--------------------|------|------------------------------------------------------------------------------------------------------------------------------------------------------------------------------------------------------|-------------------------------------------------------------------------------------------------------------------------------------------------------------------------------------------------|----------------------------------------------------------------------------|-------------------------------------------------------------------------------------------------------------------------------------------|--------------------------------------------------------------------------------------------|----------------------------------------------------------------------------------|
| JSH                | 2000 | BP ≥180/110<br><br>BP of 140-179/90-109, (depending on risk) after lifestyle modifications<br><br>BP ≥140-160/90 for 60-69 years<br>BP ≥160-170/90 for 70-79 years<br>BP ≥160-180/90 for 80-89 years | BP of 140-179/90-109 with diabetes, CVD or organ damage                                                                                                                                         | BP of 140-179/90-109 without diabetes, CVD or organ damage: for 3-6 months | BP <130/85 in young and middle-aged<br><br>BP <140/90 for 60-69 years<br>BP <150-160/90 for 70-79 years<br>BP <160-170/90 for 80-89 years | CCB, ACEI, ARB, diuretic, beta-blocker, alpha-blocker                                      | Risk stratification table available                                              |
| JSH                | 2004 | BP ≥180/110<br><br>BP of 140-179/90-109, (depending on risk) after lifestyle modifications                                                                                                           | BP of 140-179/90-109 with diabetes, CKD, organ damage, CVD, or ≥3 risk factors                                                                                                                  | BP of 140-179/90-109 with low moderate risk: for 1-3 months                | BP <130/85 in young/middle-aged<br><br>BP <140/90 in elderly                                                                              | Diuretic, beta-blocker, CCB, ACEI, ARB, alpha-blocker, central sympathetic nerve inhibitor | None                                                                             |
| JSH                | 2009 | BP ≥180/110<br><br>BP of 140-179/90-109, (depending on risk) after lifestyle modifications                                                                                                           | BP of 160-179/100-109 with 1-2 risk factors other than diabetes or MS meeting 3 items<br><br>BP of 140-179/90-109 with diabetes, CKD, organ damage, CVD, MS meeting 4 items, or ≥3 risk factors | BP of 140-179/90-109 with low moderate risk: for 1-3 months                | BP <130/85 in young/middle-aged<br><br>BP <140/90 in elderly                                                                              | Diuretic, beta-blocker, CCB, ACEI, ARB, alpha-blocker, central sympathetic nerve inhibitor | None                                                                             |
| JSH                | 2014 | BP ≥180/110<br><br>BP of 140-179/90-109, (depending on risk) after lifestyle modifications                                                                                                           | BP of 160-179/100-109 with 1-2 risk factors other than diabetes or MS meeting 3 items<br><br>BP of 140-179/90-109 with diabetes, CKD, organ damage, CVD, MS meeting 4 items, or ≥3 risk factors | BP of 140-179/90-109 with low moderate risk: for 1-3 months                | BP <140/90 for <75 years<br>BP <150/90 for ≥75 years                                                                                      | Diuretic, CCB, beta-blocker, ACEI or ARB                                                   | Lifestyle modifications are recommended as first-step treatment                  |
| <b>New Zealand</b> |      |                                                                                                                                                                                                      |                                                                                                                                                                                                 |                                                                            |                                                                                                                                           |                                                                                            |                                                                                  |
| CHDSG              | 1993 | BP ≥170/100                                                                                                                                                                                          | BP of 150-169/90-99 with 10-year CVD risk >20%: after lifestyle modifications                                                                                                                   | BP of 150-169/90-99 with 10-year CVD risk >20%: for 6 months               | Lower by at least 10/5-6                                                                                                                  | Thiazide diuretic, beta-blocker                                                            | Cardiovascular guideline (first country to introduce a cardiovascular guideline) |

| Guideline                                    | Year | Threshold for immediate treatment                                                                | Initiating treatment based on CVD risk                                                                                                                                                                                                        | Lifestyle modifications before initiating treatment <sup>†</sup>        | Treatment target range (no other complications) <sup>‡</sup>   | First line treatment                                                         | Note                                                                 |
|----------------------------------------------|------|--------------------------------------------------------------------------------------------------|-----------------------------------------------------------------------------------------------------------------------------------------------------------------------------------------------------------------------------------------------|-------------------------------------------------------------------------|----------------------------------------------------------------|------------------------------------------------------------------------------|----------------------------------------------------------------------|
| NZGG                                         | 2003 | BP $\geq$ 170/100                                                                                | 5-year CVD risk $>$ 20%, or history of CVD<br><br>5-year CVD risk of 10-20% with no history of CVD: consider drug treatment after lifestyle modifications                                                                                     | 5-year CVD risk of 10-20% with no history of CVD: for 3-6 months        | BP $<$ 140/85                                                  | Thiazide diuretic, ACEI, beta-blocker, ARB or CCB                            | Cardiovascular guideline                                             |
| NZ Primary Care Handbook 2012 (CVDRA update) | 2013 | BP $\geq$ 170/100                                                                                | BP of 130-169/80-99 with 5-year CVD risk $>$ 20%, or known CVD<br><br>BP $<$ 130/80 with 5-year CVD risk $>$ 20%, or known CVD: initiate treatment cautiously<br><br>5-year CVD risk of 10-20%: discuss with patient about starting treatment | No recommendation                                                       | BP $<$ 140/85<br><br>No target for those with CVD risk $<$ 20% | Thiazide diuretic, beta-blocker, ACEI, ARB or CCB                            | Cardiovascular guideline                                             |
| MoH                                          | 2018 | BP $\geq$ 160/100, (depending on risk) after lifestyle modifications                             | BP $\geq$ 130/80 with 5-year CVD risk $\geq$ 15%<br><br>BP $\geq$ 140/90 with 5-year CVD risk of 5-15%: discuss with patient about starting treatment                                                                                         | BP $\geq$ 160/100 with 5-year CVD risk $<$ 15%: no duration recommended | BP $<$ 130/80                                                  | ACEI, ARB, CCB, or thiazide diuretic                                         | Cardiovascular guidance                                              |
| <b>South Korea</b>                           |      |                                                                                                  |                                                                                                                                                                                                                                               |                                                                         |                                                                |                                                                              |                                                                      |
| KSH                                          | 2000 | BP $\geq$ 180/110<br><br>BP of 140-179/90-109, (depending on risk) after lifestyle modifications | No recommendation                                                                                                                                                                                                                             | Mild hypertension with low CVD risk: for 3-6 months                     | BP $<$ 140/90<br><br>BP $<$ 150/90 for elderly                 | Diuretics, beta-blocker, CCB, ACEI, ARB, alpha-blocker                       | Separate guideline for patients with CVD, diabetes or kidney disease |
| KSH                                          | 2004 | BP $\geq$ 140/90, (depending on risk) after lifestyle modifications                              | More aggressive treatment for BP $\geq$ 140/90 with target organ damage or diabetes                                                                                                                                                           | BP of 140-149/90-99 with low CVD risk: for 3-6 months                   | BP $<$ 140/90                                                  | ACEI or beta-blocker for $<$ 55 years<br>CCB or diuretic for $\geq$ 55 years | Separate guideline for patients with CVD, diabetes or kidney disease |

| Guideline | Year | Threshold for immediate treatment                                                                                      | Initiating treatment based on CVD risk                                                                              | Lifestyle modifications before initiating treatment <sup>†</sup>             | Treatment target range (no other complications)*                            | First line treatment                                                                                                            | Note                                                                                                            |
|-----------|------|------------------------------------------------------------------------------------------------------------------------|---------------------------------------------------------------------------------------------------------------------|------------------------------------------------------------------------------|-----------------------------------------------------------------------------|---------------------------------------------------------------------------------------------------------------------------------|-----------------------------------------------------------------------------------------------------------------|
| KSH       | 2013 | BP ≥160/100<br><br>BP ≥140-159/90-99, (depending on risk) after lifestyle modifications<br><br>SBP≥160 for ≥65 years   | BP of 140-159/90-99 with 10-year CVD risk of 5-10%                                                                  | BP of 130-139/85-89 with 10-year CVD risk <5%: for several weeks to 3 months | BP <140/90<br><br>SBP of 140-150 in the elderly                             | ACEI, beta-blocker (not for elderly), CCB, diuretic, ARB<br><br>Two drugs combination when BP ≥160/100 or 20/10 above target BP | Risk stratification table available<br><br>Separate guideline for patients with CVD, diabetes or kidney disease |
| KSH       | 2018 | BP ≥160/100<br><br>BP of 130-159/85-99, (depending on risk) after lifestyle modifications<br><br>SBP≥160 for ≥65 years | BP of 140-159/90-99 with moderate to high risk                                                                      | BP of 130-159/85-99 with 10-year CVD risk <5%: for several weeks to 3 months | BP <140/90 for low moderate risk or elderly<br><br>BP <130/80 for high risk | ACEI, ARB, beta-blocker, CCB, diuretics<br><br>Two drugs combination when BP ≥160/100 or 20/10 above target BP                  | Risk stratification table available<br><br>Separate guideline for patients with CVD, diabetes or kidney disease |
| <b>UK</b> |      |                                                                                                                        |                                                                                                                     |                                                                              |                                                                             |                                                                                                                                 |                                                                                                                 |
| BHS 1     | 1989 | DBP ≥100                                                                                                               | No recommendation                                                                                                   | No recommendation                                                            | DBP ~85-90                                                                  | Diuretic or beta-blocker                                                                                                        | Observe patients with DBP of 95-99 every 3-6 months                                                             |
| BHS 2     | 1993 | DBP ≥100 or BP ≥160/95                                                                                                 | DBP of 90-99 with higher BP within the range, older age (>60 years), target organ damage or coexisting risk factors | No recommendation                                                            | BP <160/90                                                                  | Thiazide diuretic or beta-blocker                                                                                               | Recommended new alternative drugs: calcium entry blockers, converting enzyme inhibitors and alpha-blockers      |
| BHS 3     | 1999 | BP ≥160/100                                                                                                            | BP of 140-159/90-99 with target organ damage, CVD, diabetes or 10-year CHD risk ≥15%                                | BP of 140-159/90-99 with no target organ damage or CVD: for 4-6 months       | BP <140/85<br>BP <150/90 minimal                                            | Low dose thiazide diuretic or beta-blocker                                                                                      | None                                                                                                            |
| BHS 4     | 2004 | BP ≥160/100                                                                                                            | BP of 140-159/90-99 with target organ damage, CVD, diabetes or 10-year CVD risk ≥20%                                | BP of 140-159/90-99 with no target organ damage or CVD: for up to 6 months   | BP <140/85<br>BP <150/90 minimal                                            | Younger (<55 years) and non-black: ACEI, ARB or beta-blocker<br><br>Older (≥55 years) or black: CCB or thiazide diuretic        | Fixed dose combinations are recommended                                                                         |
| NICE CG18 | 2004 | BP ≥160/100                                                                                                            | BP of 140-159/90-99 with target organ damage, CVD, 10-year CHD risk ≥15% or 10-year CVD risk ≥20%                   | No recommendation                                                            | BP <140/90                                                                  | Low dose thiazide-like diuretics                                                                                                | Separate guideline for patients with diabetes                                                                   |

| Guideline  | Year                      | Threshold for immediate treatment | Initiating treatment based on CVD risk                                                                                                             | Lifestyle modifications before initiating treatment <sup>†</sup>                                                     | Treatment target range (no other complications) <sup>‡</sup>                                       | First line treatment                                                                                                                                                   | Note                                                                                  |
|------------|---------------------------|-----------------------------------|----------------------------------------------------------------------------------------------------------------------------------------------------|----------------------------------------------------------------------------------------------------------------------|----------------------------------------------------------------------------------------------------|------------------------------------------------------------------------------------------------------------------------------------------------------------------------|---------------------------------------------------------------------------------------|
| NICE CG127 | 2011                      | BP ≥160/100                       | BP of 140-159/90-99 in younger ages (<80 years) with target organ damage, CVD, diabetes, renal disease or 10-year CVD risk ≥20% or equivalent      | No recommendation                                                                                                    | BP <140/90 for <80 years<br>BP <150/90 for ≥80 years                                               | Younger (<55 years) and non-black: ACEI or ARB<br><br>Older (≥55 years) or black: CCB or thiazide-like diuretic if CCB not suitable                                    | Treatment not recommended for BP of 140-159/90-99 for >80 years                       |
| NICE       | under public consultation | BP ≥160/100                       | BP of 140-159/90-99 for <80 years with target organ damage, CVD, diabetes, renal disease or 10-year CVD risk ≥10%                                  | No recommendation                                                                                                    | BP <140/90 for <80 years<br>BP <150/90 for ≥80 years                                               | Younger (<55 years) and non-black, or with diabetes: ACEI or ARB<br><br>Older (≥55 years) or black, and no diabetes: CCB or thiazide-like diuretic if CCB not suitable | Recommended to consider starting drug treatment for BP of 140-159/90-99 for >80 years |
| <b>USA</b> |                           |                                   |                                                                                                                                                    |                                                                                                                      |                                                                                                    |                                                                                                                                                                        |                                                                                       |
| JNC 1      | 1976                      | DBP ≥105                          | DBP of 90-104 with consideration of other risk factors                                                                                             | No recommendation                                                                                                    | No recommendation                                                                                  | Thiazide-type diuretic                                                                                                                                                 | SBP not included because the recommendations "would be far too complex"               |
| JNC 2      | 1980                      | DBP ≥105                          | DBP of 90-104 with consideration of target organ damage, smoking, family history of premature CVD, elevated SBP, diabetes and elevated cholesterol | No recommendation                                                                                                    | DBP <90<br>A limited goal acceptable in those with initial DBP≥105 if side effects are intolerable | Thiazide-type diuretic                                                                                                                                                 | None                                                                                  |
| JNC 3      | 1984                      | DBP ≥95                           | DBP of 90-94 with consideration of other risk factors                                                                                              | DBP of 90-94 or sustained SBP≥160, and low risk: carefully monitored but physicians can decide whether to treat      | DBP <90<br>A limited goal acceptable in those with initial DBP≥105 if side effects are intolerable | Thiazide-type diuretic or beta-blocker                                                                                                                                 | None                                                                                  |
| JNC 4      | 1988                      | DBP ≥95                           | DBP of 90-94 with high risk                                                                                                                        | DBP of 90-94 with low CVD risk or sustained SBP ≥160: carefully monitored but physicians can decide whether to treat | BP <140/90                                                                                         | Thiazide-type diuretic, beta-blocker, ACEI or calcium antagonist                                                                                                       | None                                                                                  |

| Guideline | Year | Threshold for immediate treatment                                                                | Initiating treatment based on CVD risk                                      | Lifestyle modifications before initiating treatment <sup>†</sup>                         | Treatment target range (no other complications) <sup>‡</sup>                                         | First line treatment                                                                                                                                                                                                                | Note                                                                     |
|-----------|------|--------------------------------------------------------------------------------------------------|-----------------------------------------------------------------------------|------------------------------------------------------------------------------------------|------------------------------------------------------------------------------------------------------|-------------------------------------------------------------------------------------------------------------------------------------------------------------------------------------------------------------------------------------|--------------------------------------------------------------------------|
| JNC 5     | 1993 | BP $\geq$ 160/110<br><br>BP of 140-159/90-109, (depending on risk) after lifestyle modifications | BP of 140-149/90-94 with no other risks: physicians may choose not to treat | BP of 140-179/90-109 or sustained SBP $\geq$ 160 with no other risks: for 3-6 months     | BP <140/90<br><br>For ISH:<br>SBP <160 when SBP $\geq$ 180<br>Lowered by 20 mmHg when SBP of 160-179 | Thiazide-type diuretic or beta-blocker                                                                                                                                                                                              | None                                                                     |
| JNC 6     | 1997 | BP $\geq$ 160/100<br><br>BP of 140-159/90-99, (depending on risk) after lifestyle modifications  | BP of 130-139/85-89 with target organ damage, CVD or diabetes               | BP of 140-159/90-99 without target organ damage or CVD or diabetes: for 6-12 months      | BP <140/90                                                                                           | Diuretic or beta-blocker                                                                                                                                                                                                            | Published risk stratification table for the first time                   |
| JNC 7     | 2003 | BP $\geq$ 140/90 after lifestyle modifications                                                   | No recommendation                                                           | BP $\geq$ 140/90: no specified duration                                                  | BP <140/90                                                                                           | Thiazide-type diuretic (alone for most, or in combination with another class of drug) for BP in 140-159/90-99<br><br>Two-drug combination (thiazide-type diuretic with one of ACEI, ARB, beta-blocker or CCB) for BP $\geq$ 160/100 | Recommended using fixed-dose combination when more than one drug is used |
| ASH/ISH   | 2013 | BP $\geq$ 160/100<br><br>BP of 140-159/90-99, (depending on risk) after lifestyle modifications  | BP $\geq$ 140/90 for $\geq$ 80 years with diabetes or kidney disease        | BP of 140-159/90-99 with no other risks: delaying drug therapy but no specified duration | BP <140/90                                                                                           | Two drugs (CCB or thiazide diuretic + ACEI or ARB) for BP $\geq$ 160/100<br><br>CCB or thiazide diuretic for $\geq$ 60 years or black<br><br>ACEI or ARB for <60 years and non-black                                                | None                                                                     |
| JNC 8     | 2014 | BP $\geq$ 140/90 for <60 years<br>BP $\geq$ 150/90 for $\geq$ 60 years                           | BP $\geq$ 140/90 with CKD or diabetes regardless of age                     | No recommendation                                                                        | BP <140/90 for <60 years<br>BP <150/90 for $\geq$ 60 years                                           | Thiazide-type diuretic, CCB, ACEI, or ARB for non-black<br>Thiazide-type diuretic or CCB for black                                                                                                                                  | Removed recommendations on classifications of hypertension               |
| ACC/AHA   | 2017 | BP $\geq$ 140/90                                                                                 | BP in 130-139/80-89 with clinical ASCVD or 10-year CVD risk $\geq$ 10%      | No recommendation                                                                        | BP <130/80                                                                                           | Thiazide diuretic, CCB, ACEI or ARB<br><br>2 drugs of different classes for BP $\geq$ 140/90 or BP of 20/10 over target                                                                                                             | None                                                                     |

| Guideline                                                                            | Year | Threshold for immediate treatment                                                                                                                           | Initiating treatment based on CVD risk                                                                                                                                                                   | Lifestyle modifications before initiating treatment <sup>†</sup>                                                                           | Treatment target range (no other complications) <sup>‡</sup>                                                                                  | First line treatment                                                       | Note                                                                                                   |
|--------------------------------------------------------------------------------------|------|-------------------------------------------------------------------------------------------------------------------------------------------------------------|----------------------------------------------------------------------------------------------------------------------------------------------------------------------------------------------------------|--------------------------------------------------------------------------------------------------------------------------------------------|-----------------------------------------------------------------------------------------------------------------------------------------------|----------------------------------------------------------------------------|--------------------------------------------------------------------------------------------------------|
| <b>WHO</b> (used in many parts of Europe until 2003)                                 |      |                                                                                                                                                             |                                                                                                                                                                                                          |                                                                                                                                            |                                                                                                                                               |                                                                            |                                                                                                        |
| WHO/ISH                                                                              | 1986 | DBP $\geq$ 105<br><br>DBP of 95-104, after lifestyle modifications                                                                                          | DBP of 90-94 with high risk: consider treatment                                                                                                                                                          | DBP of 95-104: for 3-6 months                                                                                                              | DBP <90                                                                                                                                       | Diuretic or beta-blocker                                                   | None                                                                                                   |
| WHO/ISH                                                                              | 1993 | BP $\geq$ 180/105 or sustained BP $\geq$ 160/95                                                                                                             | BP of 140-159/90-94 with other risk factors: consider treatment                                                                                                                                          | BP of 140-179/90-104: for 1-7 months, depending on follow-up BP measurements every 3 months                                                | BP in 120-130/80 in young patients with mild hypertension<br><br>BP <140/90 in others                                                         | Diuretic, beta-blocker, ACEI, CCB, alpha-blocker                           | None                                                                                                   |
| WHO/ISH                                                                              | 1999 | High and very high risk (10-year stroke or MI risk $\geq$ 20%) with BP $\geq$ 180/110, existing CVD, diabetes, target organ damage or $\geq$ 3 risk factors | BP $\geq$ 140/90 and medium risk (10-year risk of 15-20%) or BP $\geq$ 150/95 and low risk (10-year risk <15%), after lifestyle modifications                                                            | Medium risk for 3-6 months<br><br>Low risk for 6-12 months                                                                                 | BP <130/85 in younger<br><br>BP <140/90 in older                                                                                              | No recommendation                                                          | Patients with BP of 140-149/90-94 may choose not to start drug treatment                               |
| WHO/ISH                                                                              | 2003 | 10-year stroke or MI risk $\geq$ 20% with BP $\geq$ 180/110, existing CVD, diabetes, target organ damage or $\geq$ 3 risk factors                           | Not clearly stated: BP $\geq$ 160/100 for both medium and low risk are recommended, but alluded the emerging evidence of the benefits for those with BP going down to 140/90                             | Not clearly stated                                                                                                                         | BP <130/80 in high risk<br>BP <150/90 in low risk and medium risk and <55 years<br>BP <140/90 in low risk and medium risk and $\geq$ 55 years | Low dose diuretic, unless compelling indication for another class of drugs | Last guideline before WHO stopped publishing hypertension guidelines in favour of risk-based treatment |
| <b>ESH/ESC</b> (adopted in Italy, Germany, Spain and parts of Ireland <sup>§</sup> ) |      |                                                                                                                                                             |                                                                                                                                                                                                          |                                                                                                                                            |                                                                                                                                               |                                                                            |                                                                                                        |
| ESH/ESC                                                                              | 2003 | BP $\geq$ 180/110<br><br>BP of 140-179/90-109, (depending on risk) after lifestyle modifications                                                            | BP of 130-139/85-89 with $\geq$ 3 risk factors, target organ damage, diabetes or associated clinical conditions                                                                                          | BP of 140-179/90-109 with 0-2 risk factors: 3-12 months; treatment is optional for low risk                                                | BP <140/90                                                                                                                                    | Diuretic, beta-blocker, CCB, ACEI, or ARB                                  | Risk stratification table available                                                                    |
| ESH/ESC                                                                              | 2007 | BP $\geq$ 180/110<br><br>BP of 140-179/90-109, (depending on risk) after lifestyle modifications                                                            | BP of 130-139/85-89 with CVD, renal disease, diabetes, $\geq$ 3 risk factors, organ damage or MS: (depending on risk) after lifestyle modifications<br><br>BP of 120-129/80-84 with CVD or renal disease | BP of 140-179/90-109: for several weeks to several months<br><br>BP of 130-139/85-89 with $\geq$ 3 risk factors, target organ damage or MS | BP <140/90<br><br>BP <130/80 in high risk                                                                                                     | Thiazide diuretic, beta-blocker, ACEI, CCB, or ARB                         | Risk stratification table available                                                                    |



| Guideline | Year | Threshold for immediate treatment                                                                | Initiating treatment based on CVD risk                                                                                                                                                   | Lifestyle modifications before initiating treatment <sup>†</sup>                                                                                                        | Treatment target range (no other complications) <sup>‡</sup>                              | First line treatment                                                                              | Note                                                                             |
|-----------|------|--------------------------------------------------------------------------------------------------|------------------------------------------------------------------------------------------------------------------------------------------------------------------------------------------|-------------------------------------------------------------------------------------------------------------------------------------------------------------------------|-------------------------------------------------------------------------------------------|---------------------------------------------------------------------------------------------------|----------------------------------------------------------------------------------|
| ESH/ESC   | 2013 | BP $\geq$ 180/110<br><br>BP of 140-179/90-109, (depending on risk) after lifestyle modifications | BP of 140-159/90-99 with organ damage, CKD stage $\geq$ 3, diabetes or CVD<br><br>BP of 160-179/100-109 with $\geq$ 3 risk factors, or organ damage, CKD stage $\geq$ 3, diabetes or CVD | BP of 140-159/90-99 without CVD, organ damage, CKD or diabetes: for several weeks to several months<br><br>BP of 160-179/90-99 with 0-2 risk factors: for several weeks | BP <140/90                                                                                | Thiazide diuretic, beta-blocker, ACEI, CCB, or ARB                                                | Risk stratification table available                                              |
| ESC/ESH   | 2018 | BP $\geq$ 180/110<br><br>BP of 140-179/90-109, (depending on risk) after lifestyle modifications | BP of 130-139/85-89 with very high risk due to CVD especially CAD                                                                                                                        | BP of 140-159/90-99 without CVD, hypertension-mediated organ damage or renal disease: for 3-6 months                                                                    | DBP <80 for all<br><br>SBP of 120-129 for <65 years<br>SBP of 130-139 for $\geq$ 65 years | Two-drug combination except in frail old patients and those with BP of 140-159/90-99 and low risk | Risk stratification table available<br><br>Single-pill combination is preferable |

Units for blood pressure are mmHg.

<sup>†</sup> Lifestyle modifications *alongside* pharmacological treatment are always recommended and they are not specified individually for each guideline in this table.

<sup>‡</sup> Treatment targets usually differ for patients with other conditions, e.g., diabetes. These separate targets are not listed.

<sup>Δ</sup> CHEP publishes annual updates of hypertension guidelines. Only selected years with noticeable changes are listed in this table.

<sup>§</sup> Both UK and ESH/ESC guidelines were used in Ireland.

BP: blood pressure; SBP: systolic blood pressure; DBP: diastolic blood pressure.

ASCVD: atherosclerotic cardiovascular disease; CAD: coronary artery disease; CKD: chronic kidney disease; CVD: cardiovascular disease; MI: myocardial infarction; MS: metabolic syndrome.

ACEI: angiotensin-converting-enzyme inhibitor; ARB: angiotensin receptor blocker; CCB: calcium channel blocker.

ACC: American College of Cardiology; AHA: American Heart Association; ASH: American Society of Hypertension; BHS: British Society of Hypertension; CHEP: Canadian Hypertension Education Program; CHDSG: Core Health & Disability Services Guidelines; CHS: Canadian Hypertension Society; CVDRA: Cardiovascular Disease Risk Assessment; ESC: European Society of Cardiology;

ESH: European Society of Hypertension; FHS: Finnish Hypertension Society; FMSD: Finnish Medical Society Duodecim; HC: Hypertension Canada; ISH: International Society of Hypertension;

JMA: Japan Medical Association; JNC: Joint National Committee; JSH: Japanese Society of Hypertension; KSH: Korean Society of Hypertension; MoH: Ministry of Health; NHFA: National Heart

Foundation of Australia; NICE CG: The National Institute for Health and Care Excellence Clinical Guideline; NZGG: New Zealand Guidelines Group; WHO: World Health Organization.

**Appendix Table 7.** Selected characteristics of healthcare and insurance system in the 12 countries included in the analysis.

| Country   | Public and private insurance coverage                                                                                                 | Financing of healthcare                                                                                                                                 | Major change in healthcare and insurance system                                                         | Co-payment                                                                                                                                 | Hypertension management in primary care                                      | National screening and hypertension education programmes                                                                 | Financial incentives to primary care physicians       |
|-----------|---------------------------------------------------------------------------------------------------------------------------------------|---------------------------------------------------------------------------------------------------------------------------------------------------------|---------------------------------------------------------------------------------------------------------|--------------------------------------------------------------------------------------------------------------------------------------------|------------------------------------------------------------------------------|--------------------------------------------------------------------------------------------------------------------------|-------------------------------------------------------|
| Australia | Public 100%; optional private health cover                                                                                            | General taxation and Medicare Levy (2% of taxable income – some exemptions for low income earners)                                                      | Medicare (universal coverage) introduced in 1975 and refined in 1984                                    | Co-payment and price cap on medicines; safety net on annual medicine spending                                                              | Hypertension is diagnosed and managed in primary care                        | None                                                                                                                     | Some incentives for managing chronic diseases         |
| Canada    | Public 100%, for physician consultations and for drugs provided in hospitals. Private benefit plans vary in coverage of prescriptions | Personal and corporate taxation at the federal and provincial level.                                                                                    | Canada Health Act 1984                                                                                  | Needed for prescriptions; private benefit plans cover varying proportions of prescriptions                                                 | Hypertension is diagnosed and managed in primary care                        | Canadian Hypertension Education Program 1999; Canadian Hypertension Awareness Program 2003; Hypertension Canada 2018     | Provincial programmes exist but no national programme |
| Finland   | Public 100%                                                                                                                           | General taxation                                                                                                                                        | Public Health Law 1972 (every municipality became responsible for arranging primary care for residents) | Small co-payments and out-of-pocket payments. All healthcare costs capped at 683 euros per year                                            | Hypertension is mainly diagnosed and managed in primary care                 | None                                                                                                                     | None                                                  |
| Germany   | 99.9% coverage (87.6% public, 11.5% private)                                                                                          | 78% compulsory health insurance (equal contributions by employer and employee), 7% government schemes, 13% out-of-pocket, 1% voluntary health insurance | Federal Joint Committee 2004                                                                            | Co-payment for outpatient prescriptions, for inpatient care in hospitals and rehabilitation centres, and for prescribed medical devices    | Hypertension is diagnosed and managed in primary and specialist care         | Health check-ups including BP screening for those aged $\geq 35$ years since 1989 (expanding to $\geq 18$ years in 2019) | None                                                  |
| Ireland   | Health insurance does not cover care at GP level; 46% population had private health insurance (2015)                                  | 69% tax, 15% out-of-pocket payments, 13% private (2014)                                                                                                 | Free GP care for those aged $<6$ years and $>70$ years (2011)                                           | Out-of-pocket fees for access primary care, price set by self-employed GPs; exemption according to age and income                          | Hypertension is mainly diagnosed and managed in primary care                 | None                                                                                                                     | None                                                  |
| Italy     | Public 100% National Health Service (SSN) since 1978; voluntary additional private cover                                              | General taxation and contributions (central and regional governments)                                                                                   | National Health Service (SSN) in 1978                                                                   | Partial payment per prescription; exemption for medicine and specialised tests in hypertensive patients if performed in specialist centres | Hypertension is diagnosed and managed in primary care and specialist centres | National Preventive Plan 2005-2008 recommended CVD risk assessment including BP measurements                             | None                                                  |

| Country     | Public and private insurance coverage                                                         | Financing of healthcare                                                                                        | Major change in healthcare and insurance system                                                                                                                                                                                                         | Co-payment                                                                                                                                 | Hypertension management in primary care                                                    | National screening and hypertension education programmes                                                                                                                                                                | Financial incentives to primary care physicians                            |
|-------------|-----------------------------------------------------------------------------------------------|----------------------------------------------------------------------------------------------------------------|---------------------------------------------------------------------------------------------------------------------------------------------------------------------------------------------------------------------------------------------------------|--------------------------------------------------------------------------------------------------------------------------------------------|--------------------------------------------------------------------------------------------|-------------------------------------------------------------------------------------------------------------------------------------------------------------------------------------------------------------------------|----------------------------------------------------------------------------|
| Japan       | Social insurance 100%; voluntary private health insurance, participated by ~90% of households | Taxes (39% in 2014), insurance premiums (49%), out-of-pocket payments (12%)                                    | Long-term care insurance system (2000); Integrated Community Care System (2006); late-stage medical care system for the elderly aged $\geq 75$ years (2008); Comprehensive Reform of Society Security and Tax (2010); Regional Healthcare Vision (2014) | 10-30% of costs                                                                                                                            | Hypertension is diagnosed and managed in primary care                                      | Specific health check-up and specific health guidance for those aged 40-74 since 2008                                                                                                                                   | A referral system for the use of hospital services through clinic services |
| New Zealand | Public 100%; 35% adults also had private insurance in 2017/18                                 | General taxation (78% in 1999), supplemented by out-of-pocket payments (16%) and private health insurance (6%) | Introduced market model practices into health sector in the 1990s; returned responsibility to District Health Boards in Public Health and Disability Act 2000                                                                                           | Patients have co-payments for primary care consultations, varies by socioeconomic status, age, and ethnicity (e.g., free checks for Maori) | Cardiovascular risk assessment (including hypertension management) managed in primary care | None                                                                                                                                                                                                                    | Incentives for diabetes and cardiovascular risk assessments                |
| South Korea | Public; increased from ~25% in 1980 to ~100% in 1989                                          | 56.5% public sources, 6.7% private insurance, 36.8% out of pocket in 2014                                      | National Health Insurance established in 1989                                                                                                                                                                                                           | Payment per prescription                                                                                                                   | Hypertension is diagnosed and managed in primary care                                      | National health screening programme (including BP check) has been expanded especially for those aged $\geq 40$ years since 2007; national comprehensive management plan (2006) for cardio- and cerebrovascular diseases | None                                                                       |
| Spain       | Public (National Health Service); ~15% of the population also have private insurance          | General taxation                                                                                               | Royal Decree Law 16/2012, 7/2018                                                                                                                                                                                                                        | Small co-payment to pharmacy                                                                                                               | Hypertension is diagnosed and managed in primary care                                      | Preventive Activities and Health Promotion Program (PAPPS) since 1989 recommended BP measurements in primary care every two years for those aged $>40$ years                                                            | None                                                                       |

| Country | Public and private insurance coverage                                     | Financing of healthcare                                     | Major change in healthcare and insurance system | Co-payment                                                                                  | Hypertension management in primary care                                                                                                       | National screening and hypertension education programmes   | Financial incentives to primary care physicians                                                                    |
|---------|---------------------------------------------------------------------------|-------------------------------------------------------------|-------------------------------------------------|---------------------------------------------------------------------------------------------|-----------------------------------------------------------------------------------------------------------------------------------------------|------------------------------------------------------------|--------------------------------------------------------------------------------------------------------------------|
| UK      | Public (National Health Service) 100%; voluntary additional private cover | General taxation                                            | None                                            | Mostly free at point of use; co-payment for prescriptions with exemption for special groups | Hypertension is diagnosed and managed in primary care                                                                                         | NHS Health Check for those aged $\geq 40$ years since 2009 | Quality and Outcomes Framework (QOF): voluntary payment scheme that linked up to 25% of GP's income to performance |
| USA     | Public and private insurance for ~80-90% of population                    | 48% public source, 40% private insurance, 12% out of pocket | Affordable Care Act 2010                        | Dependent on health system and service                                                      | Hypertension is diagnosed and managed in primary care; testing and screening frequently done non-systematically outside the healthcare system | National High Blood Pressure Education Program since 1972  | Dependent on health insurance scheme                                                                               |

BP: blood pressure; GP: general practitioner.

**Appendix Figure 1.** Trends in hypertension prevalence, and rates of awareness, treatment, control, and control among those treated, by country, sex and age group.

### Australia (women)

### Australia (men)

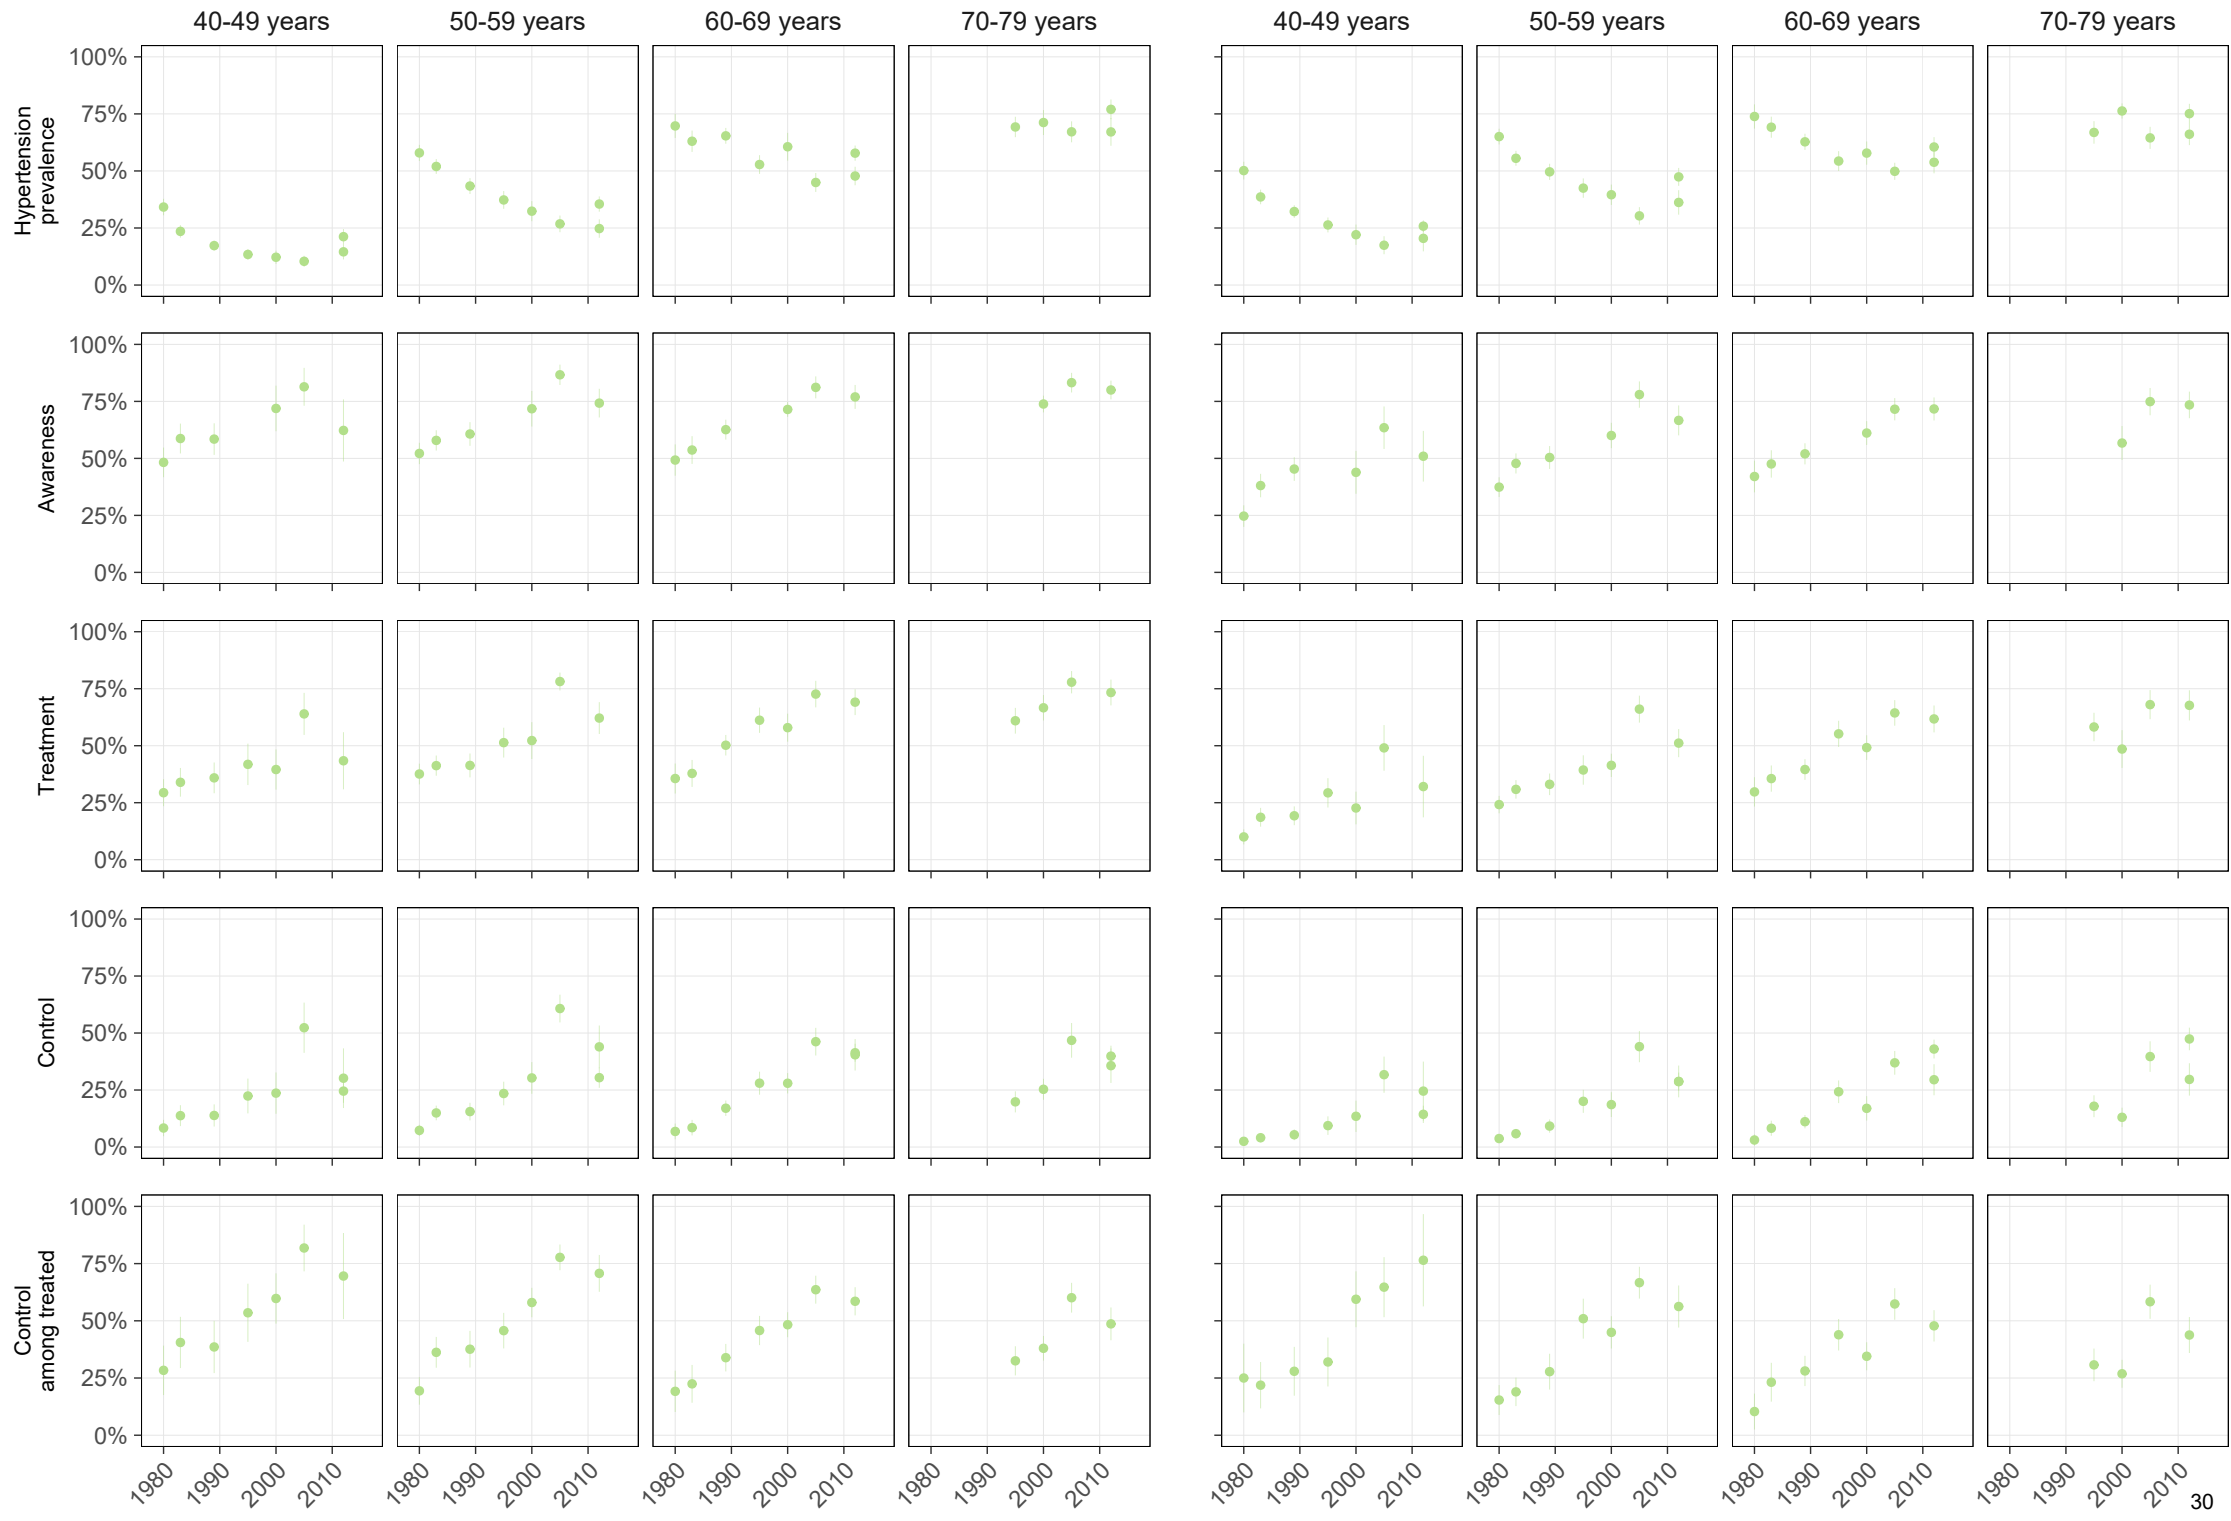

### Canada (women)

### Canada (men)

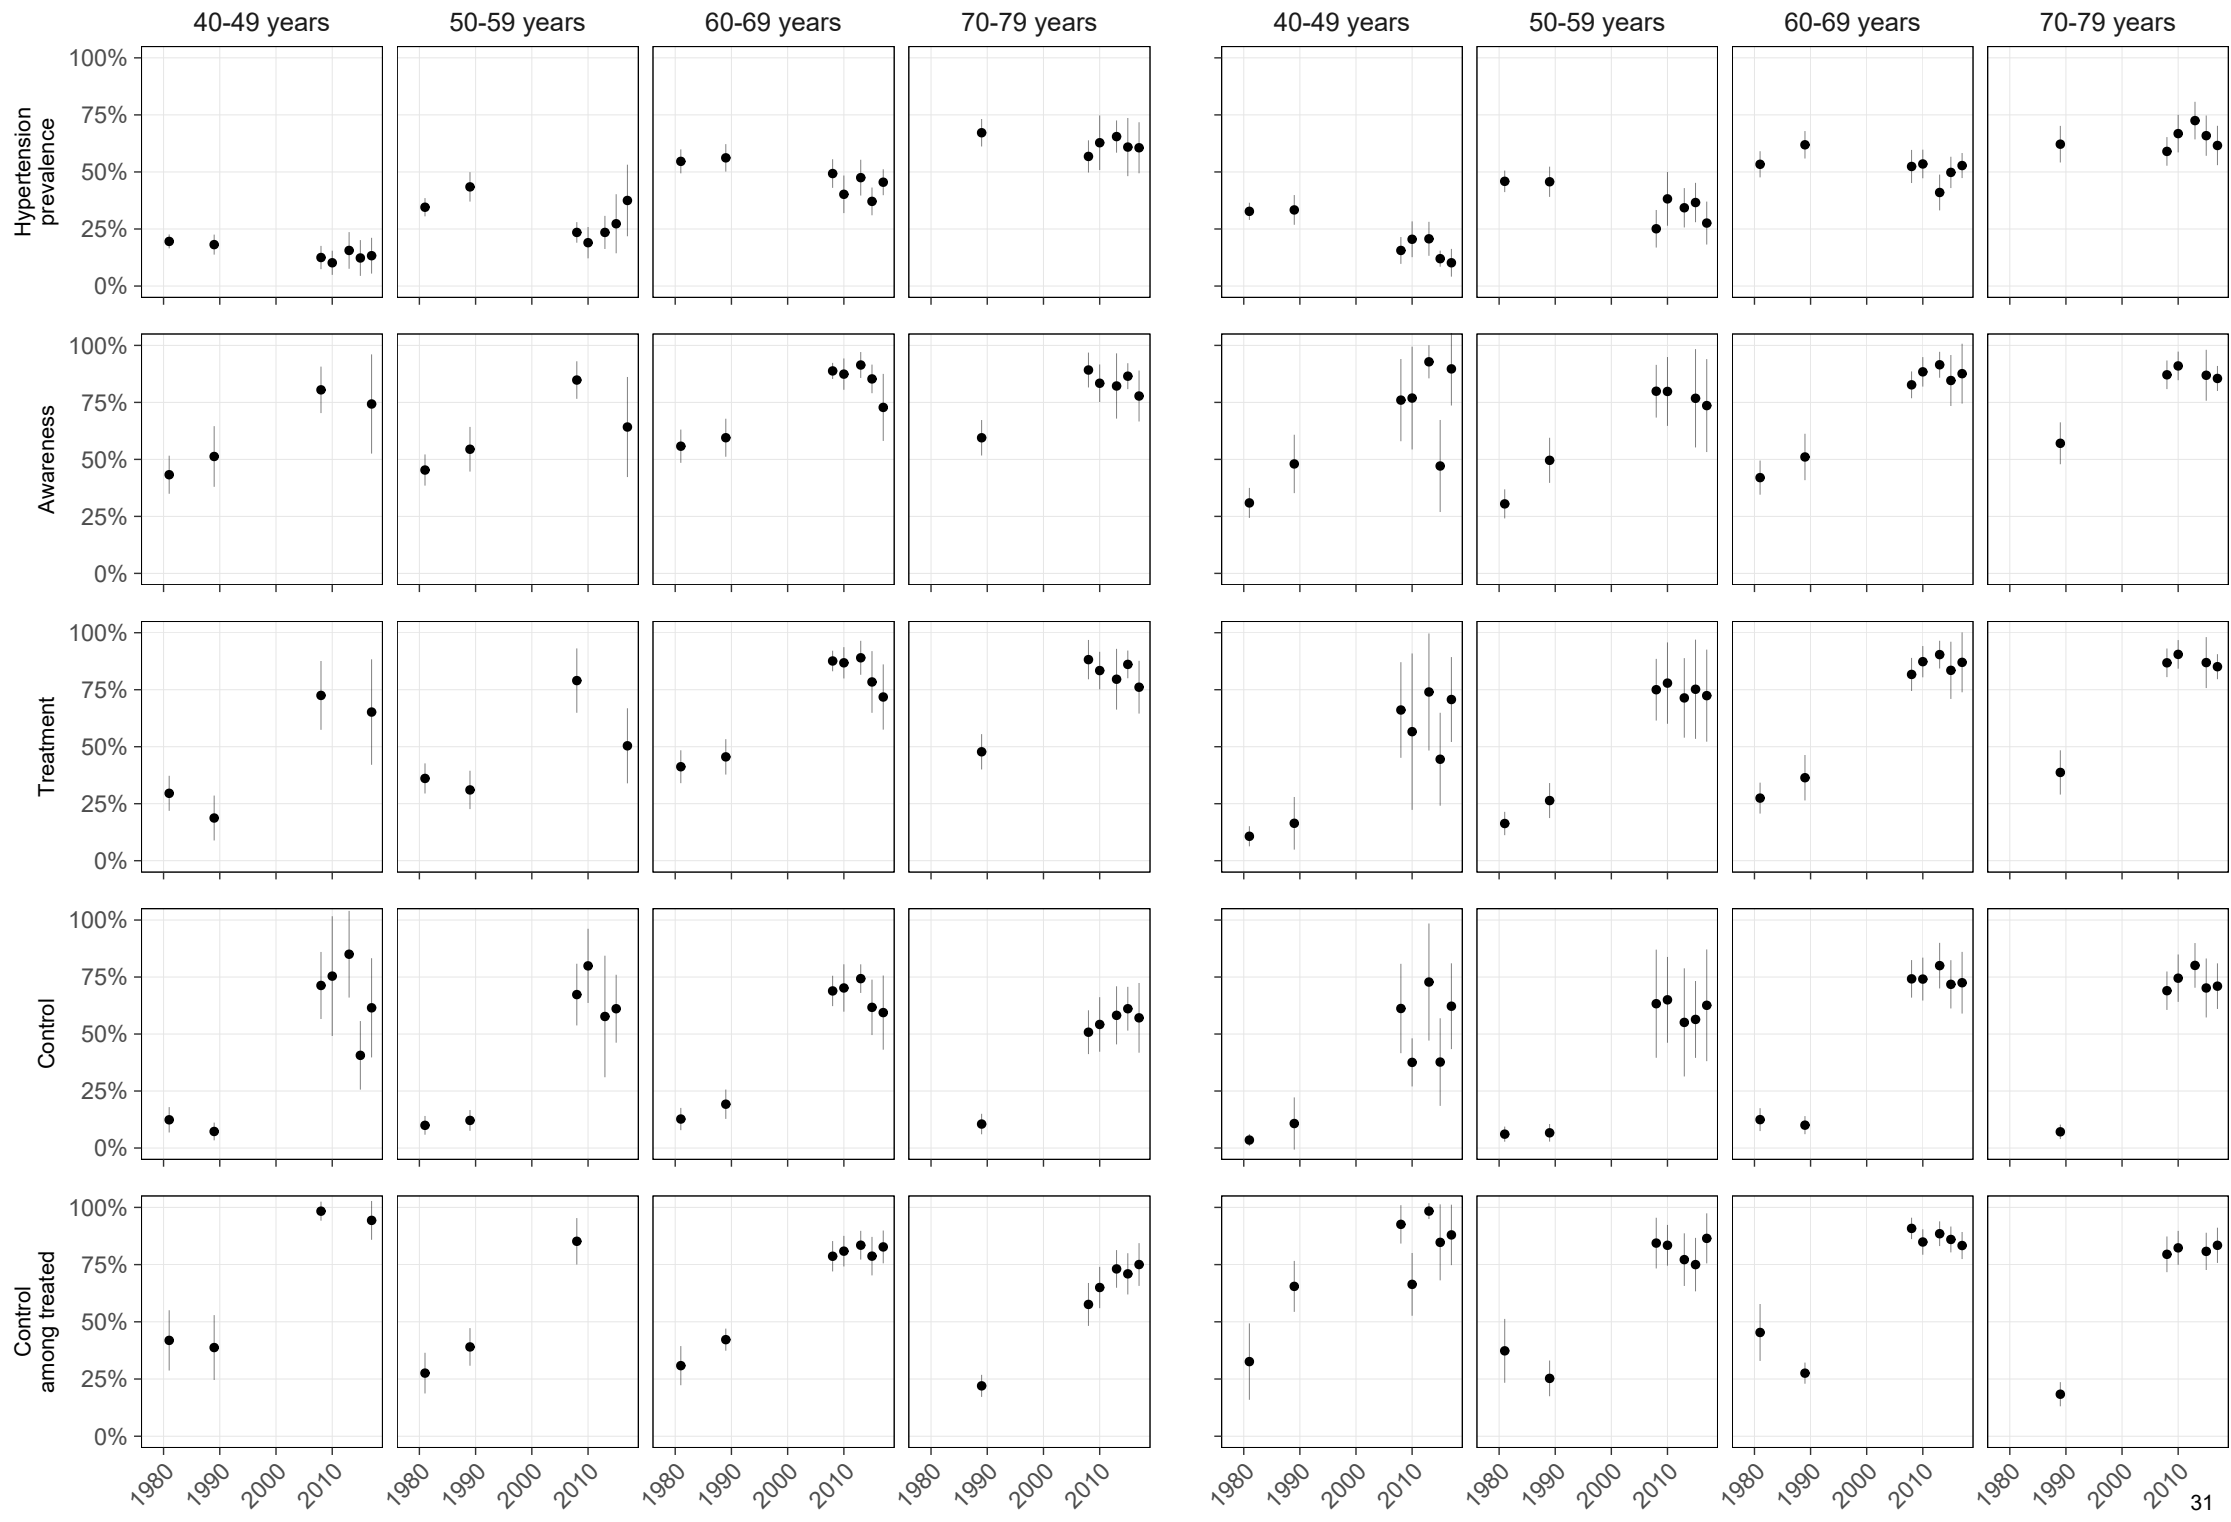



# Finland (women)

# Finland (men)

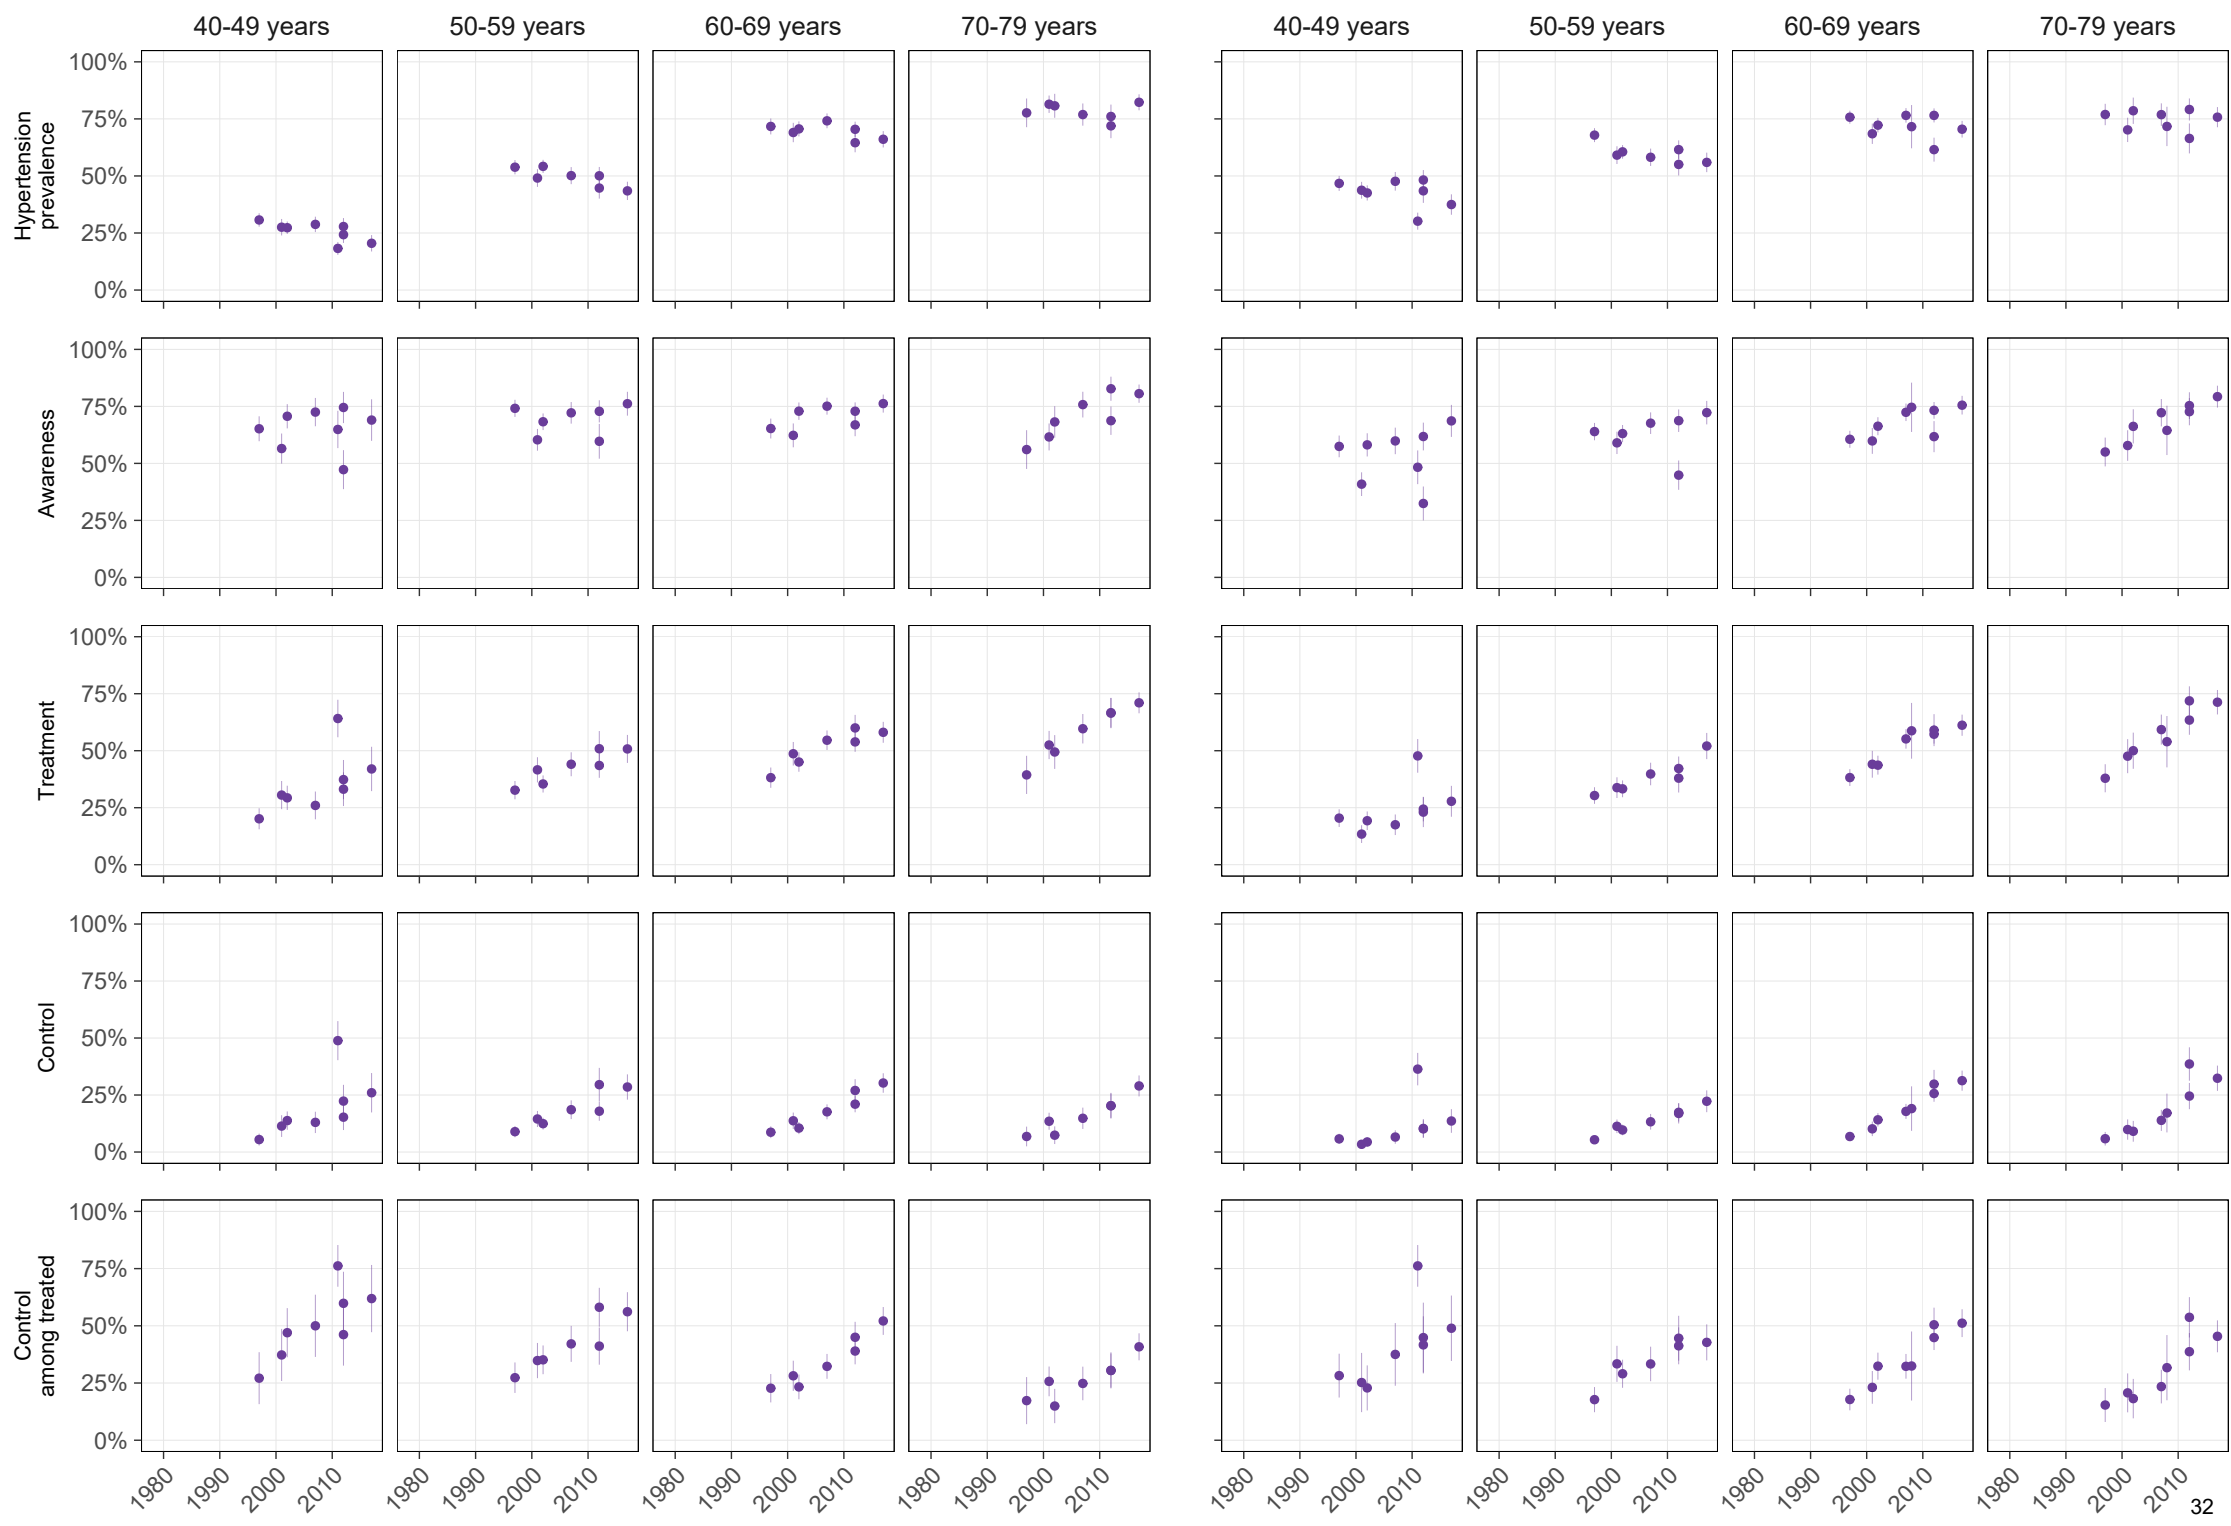

### Germany (women)

### Germany (men)

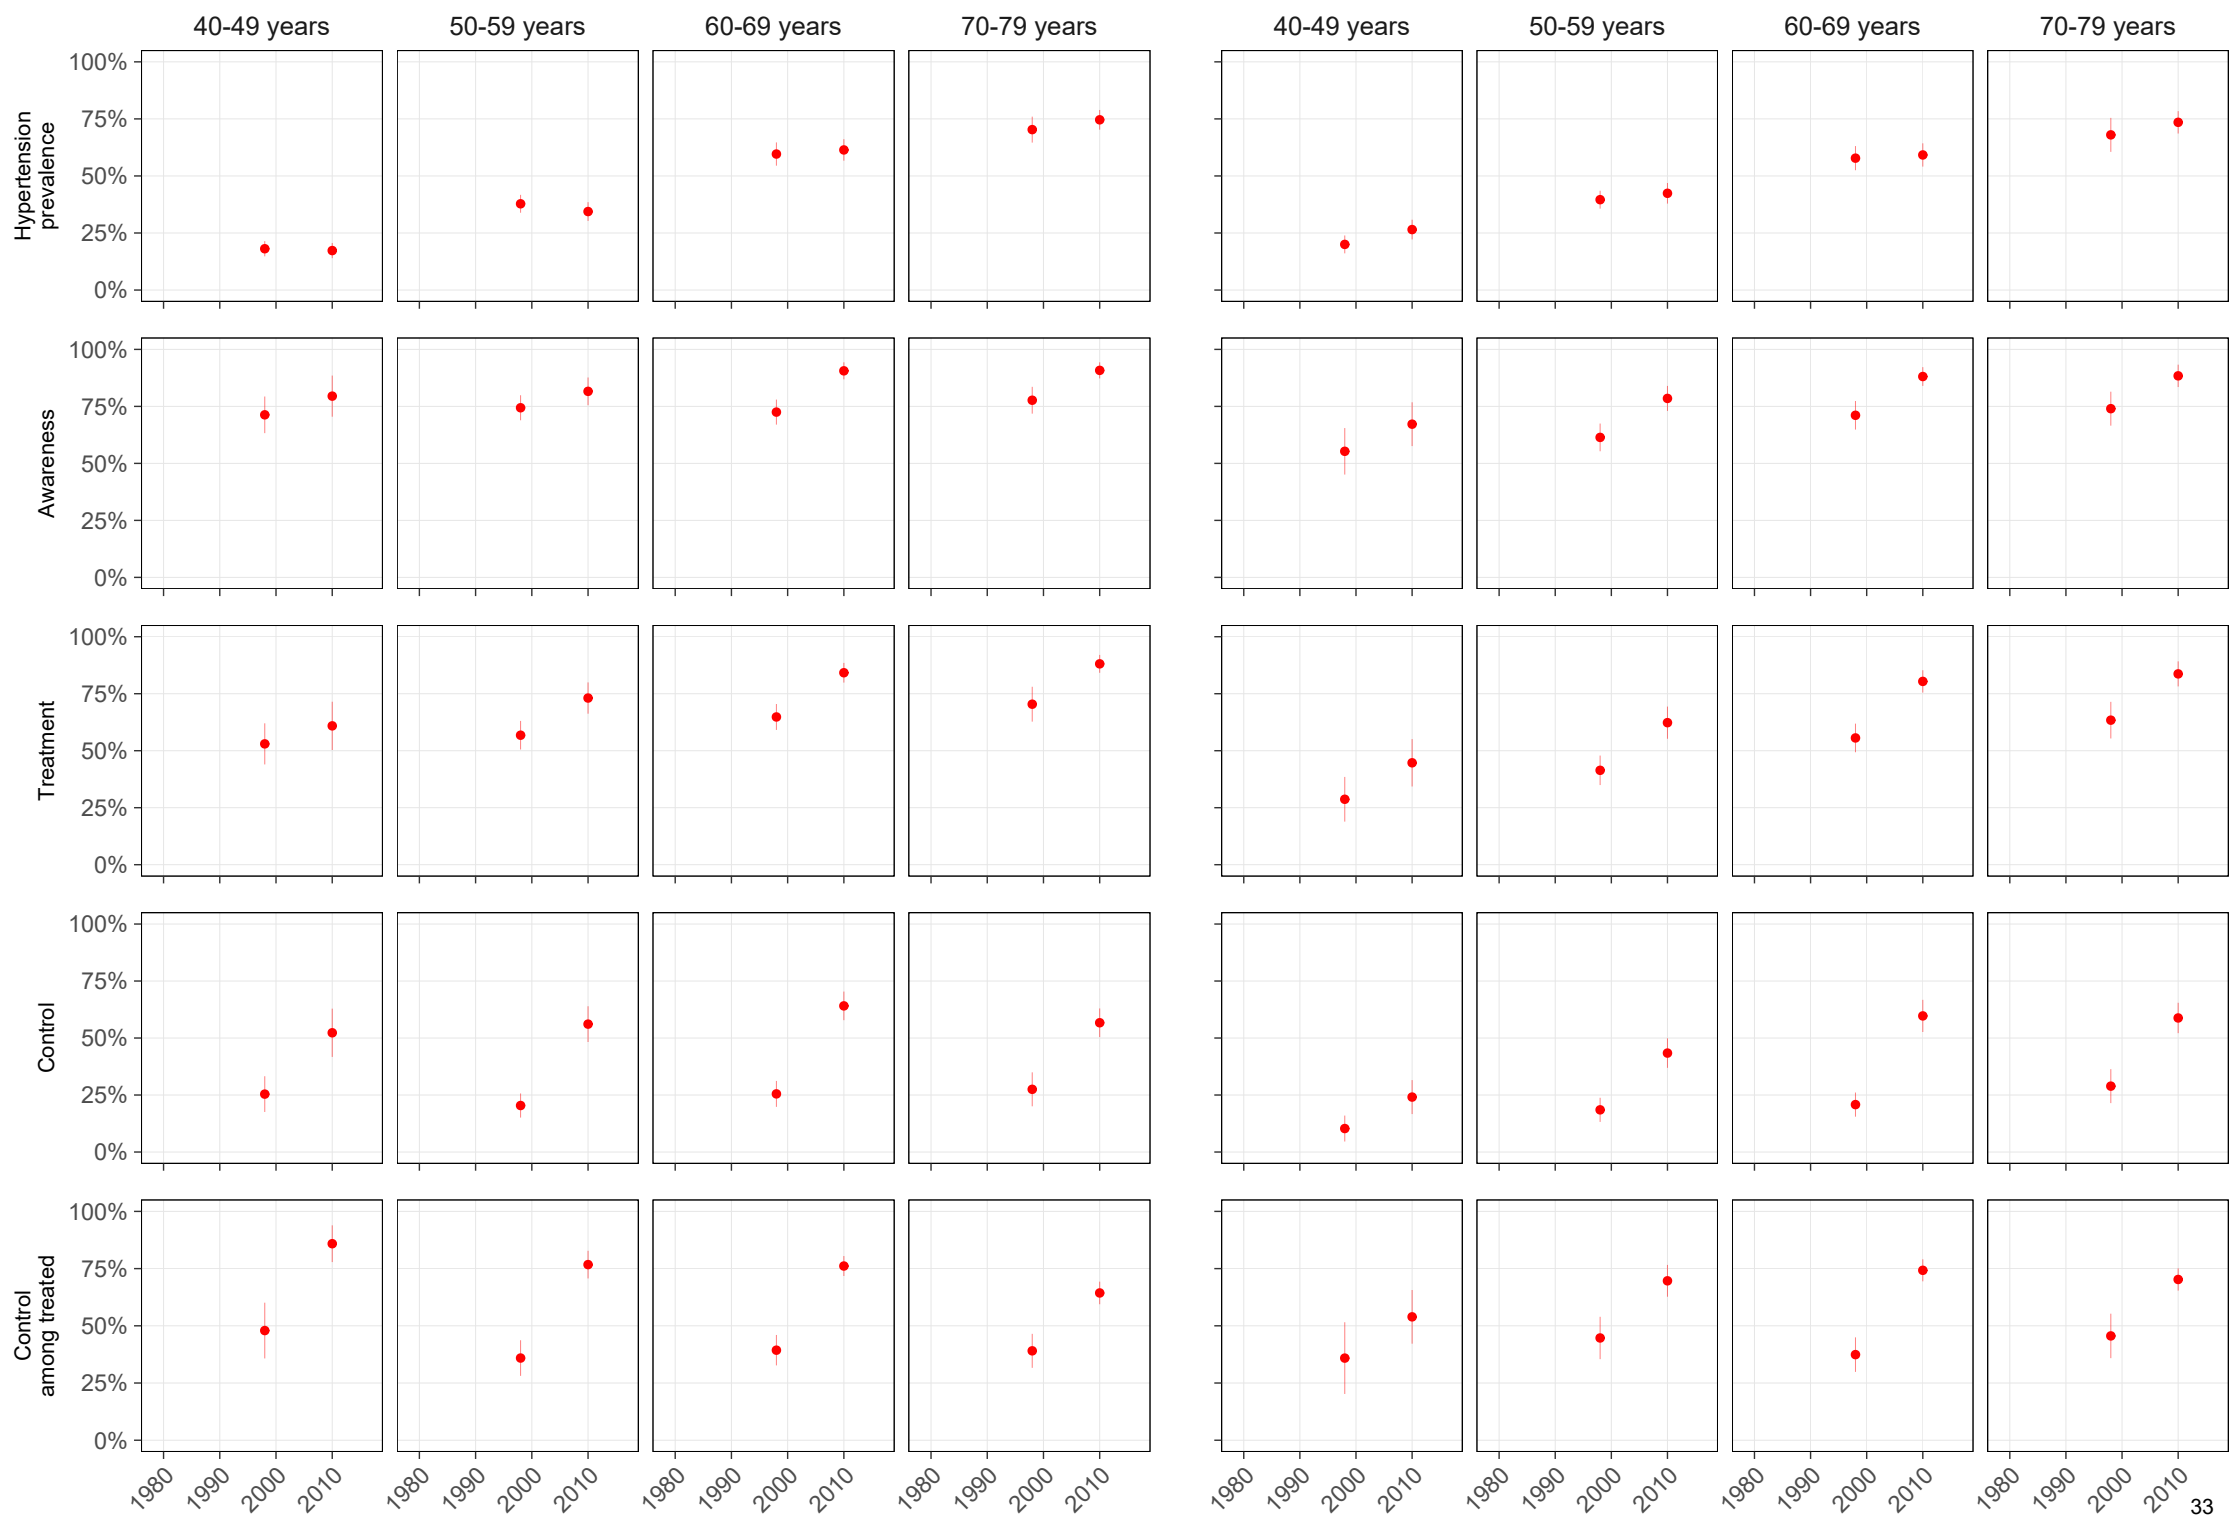

### Ireland (women)

### Ireland (men)

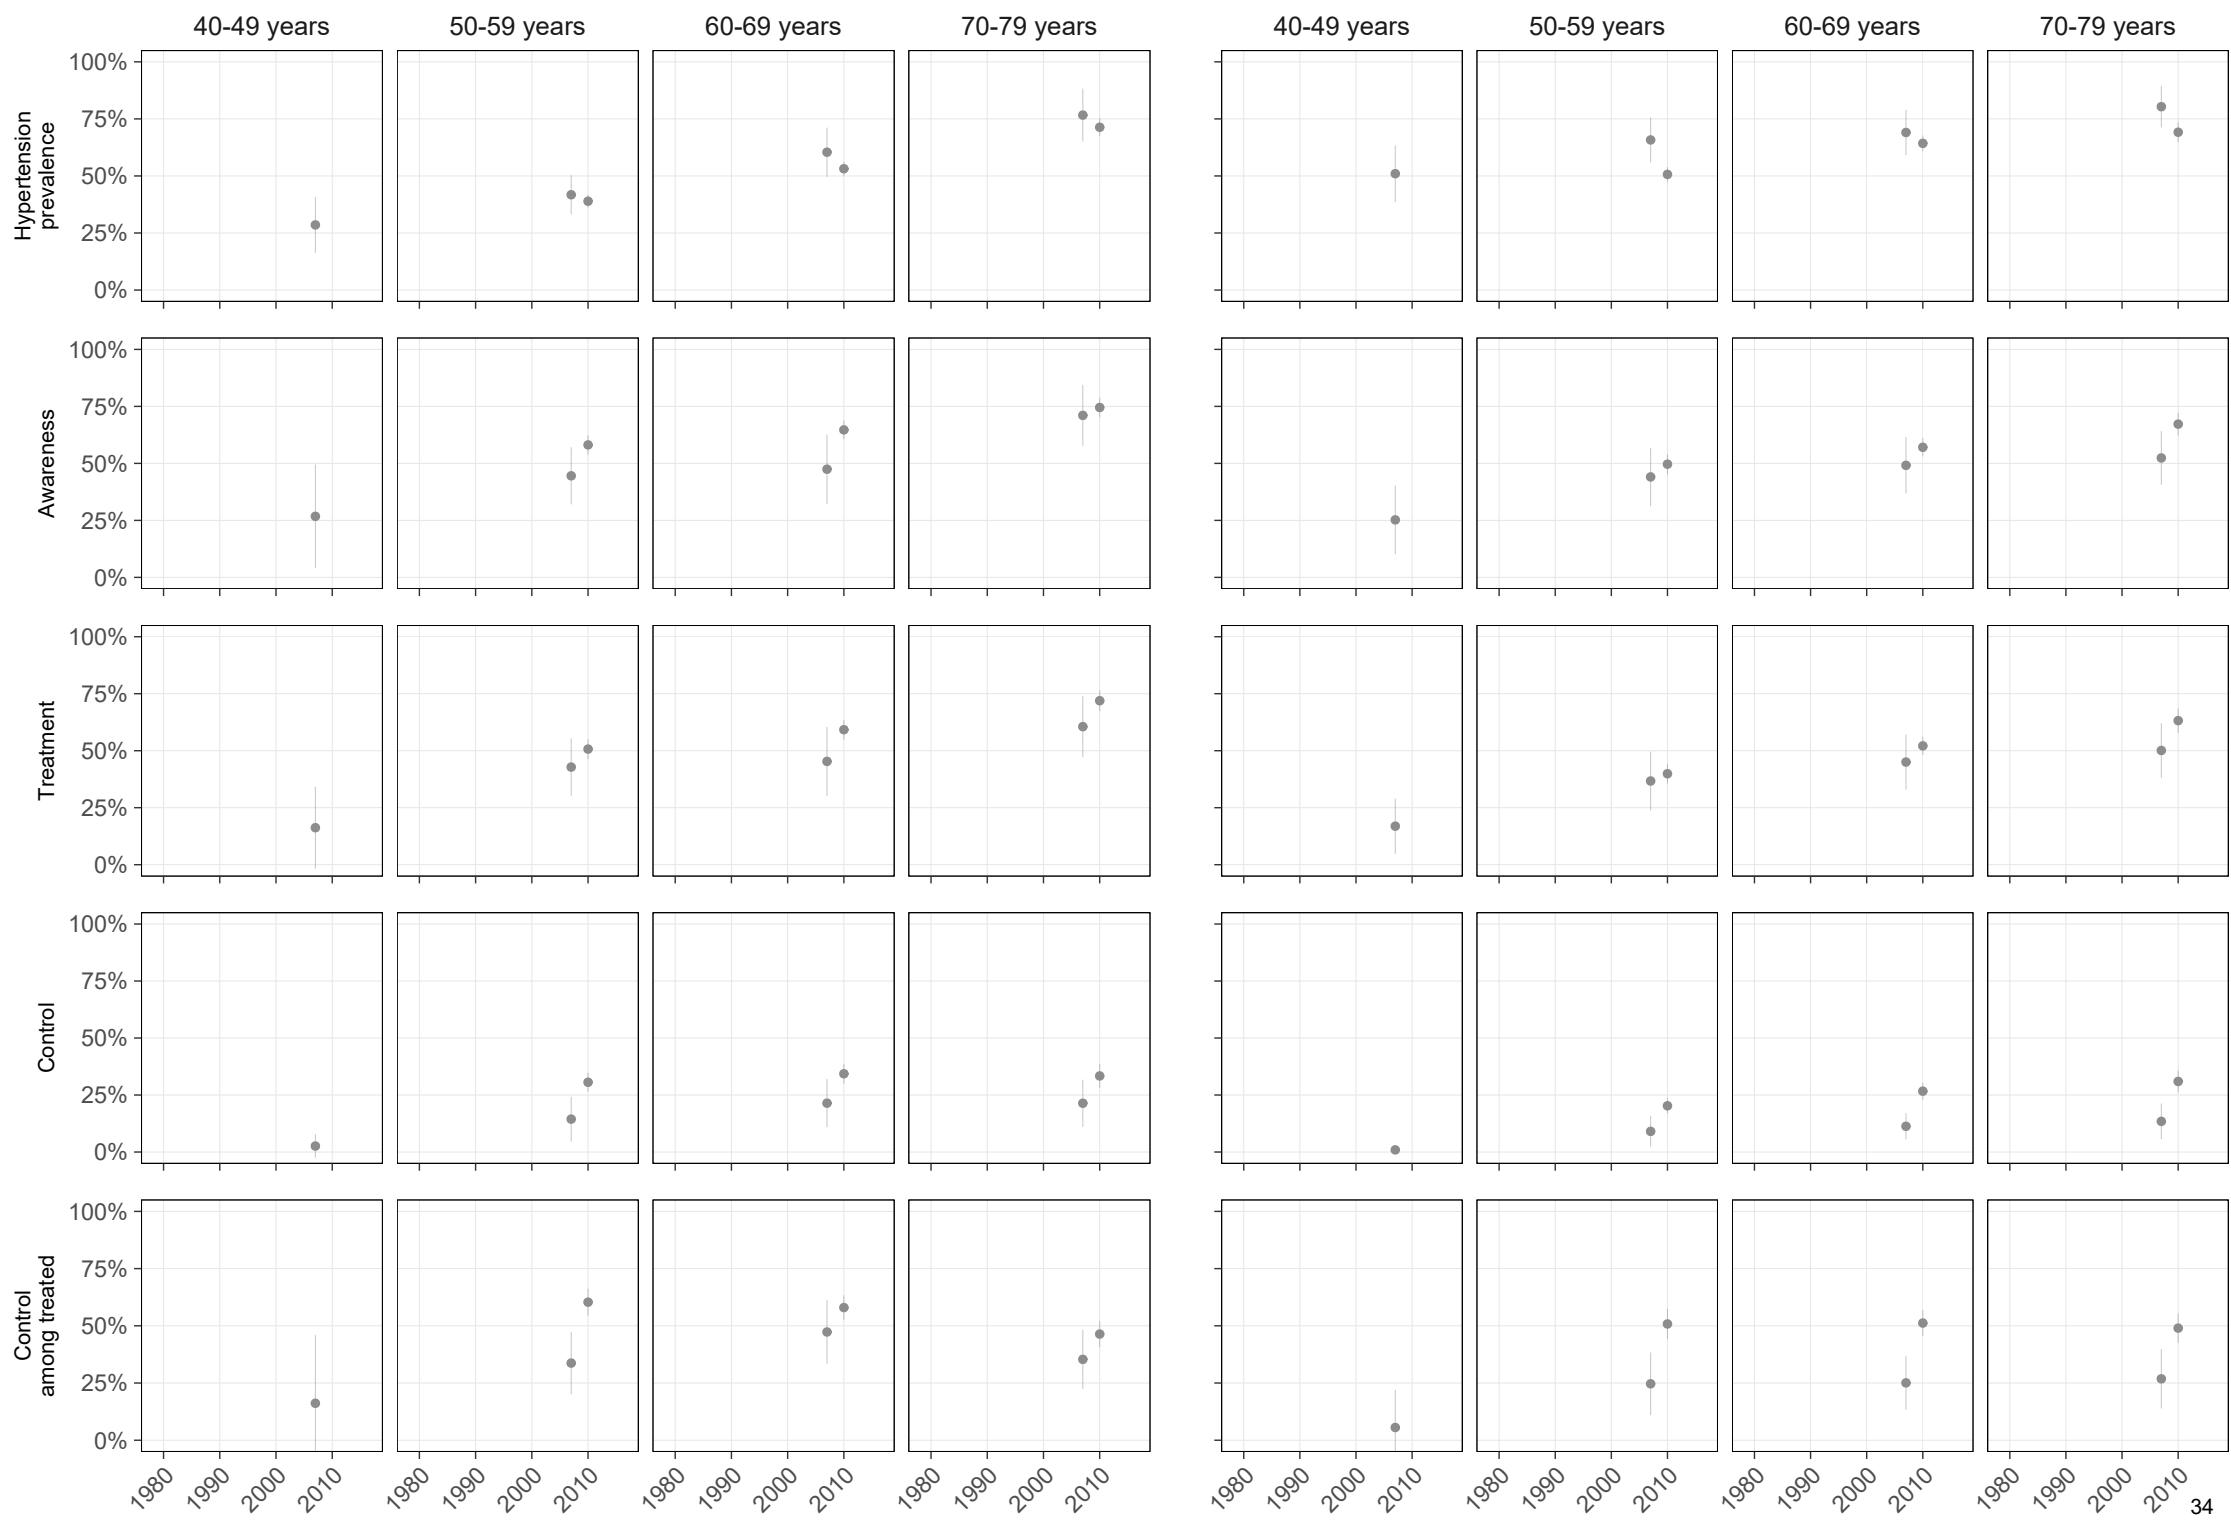

### Italy (women)

### Italy (men)

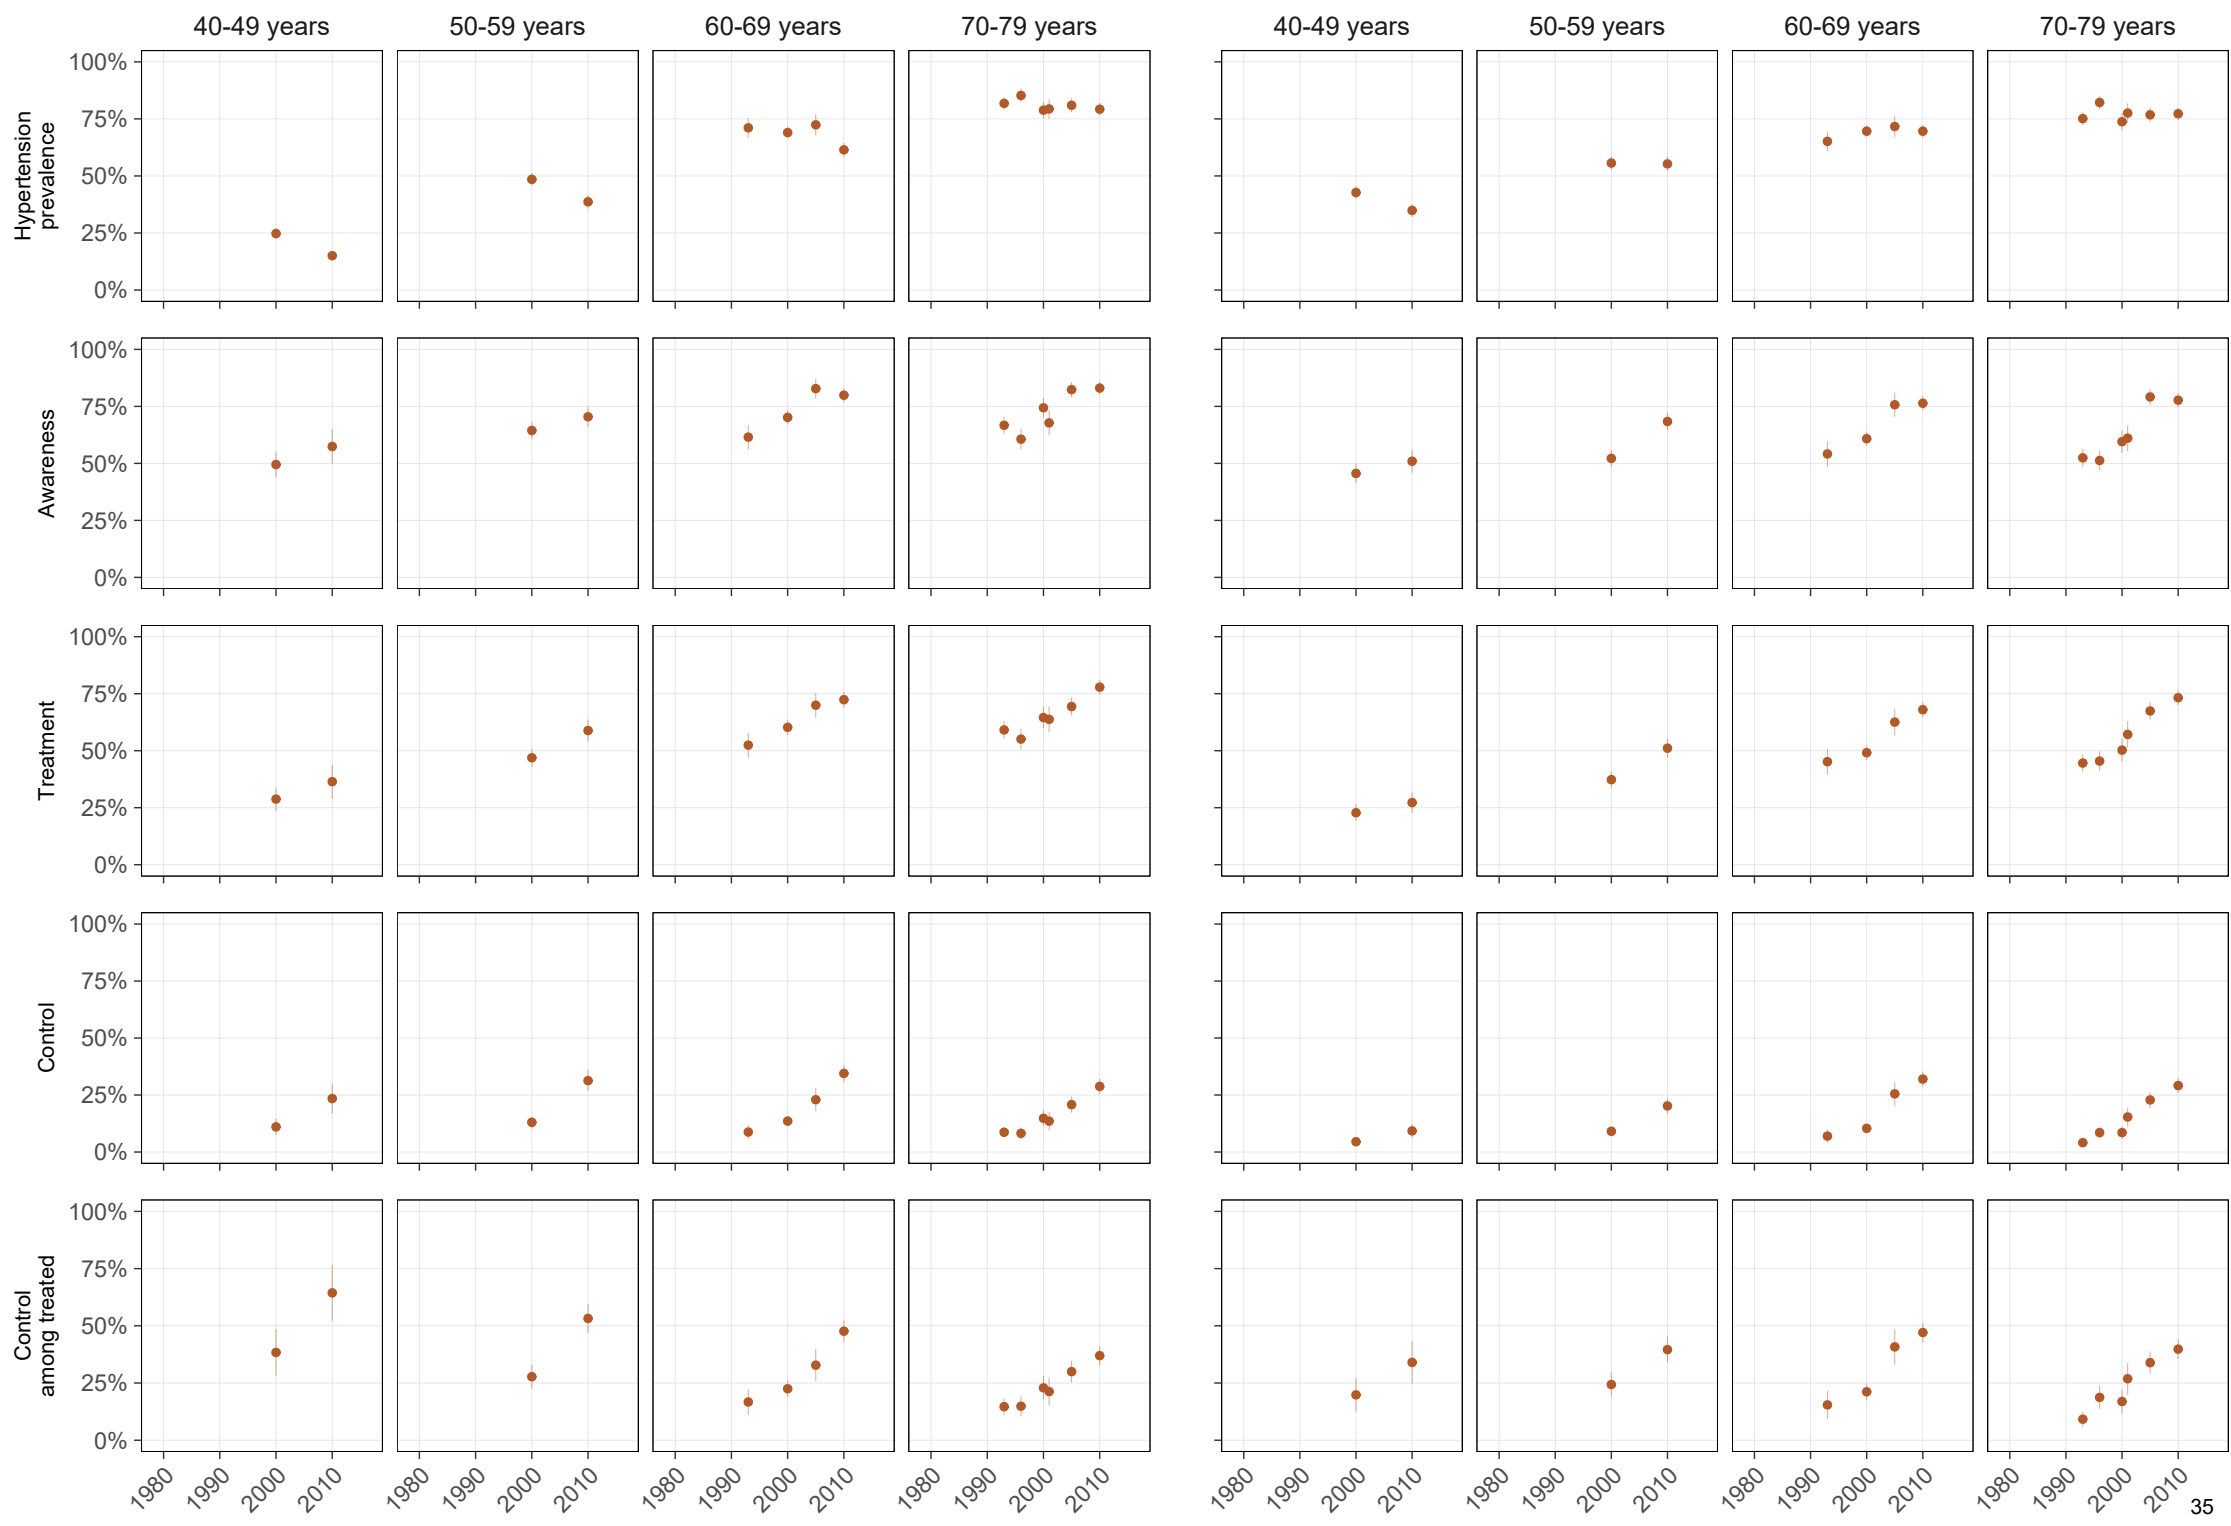

# Japan (women)

# Japan (men)

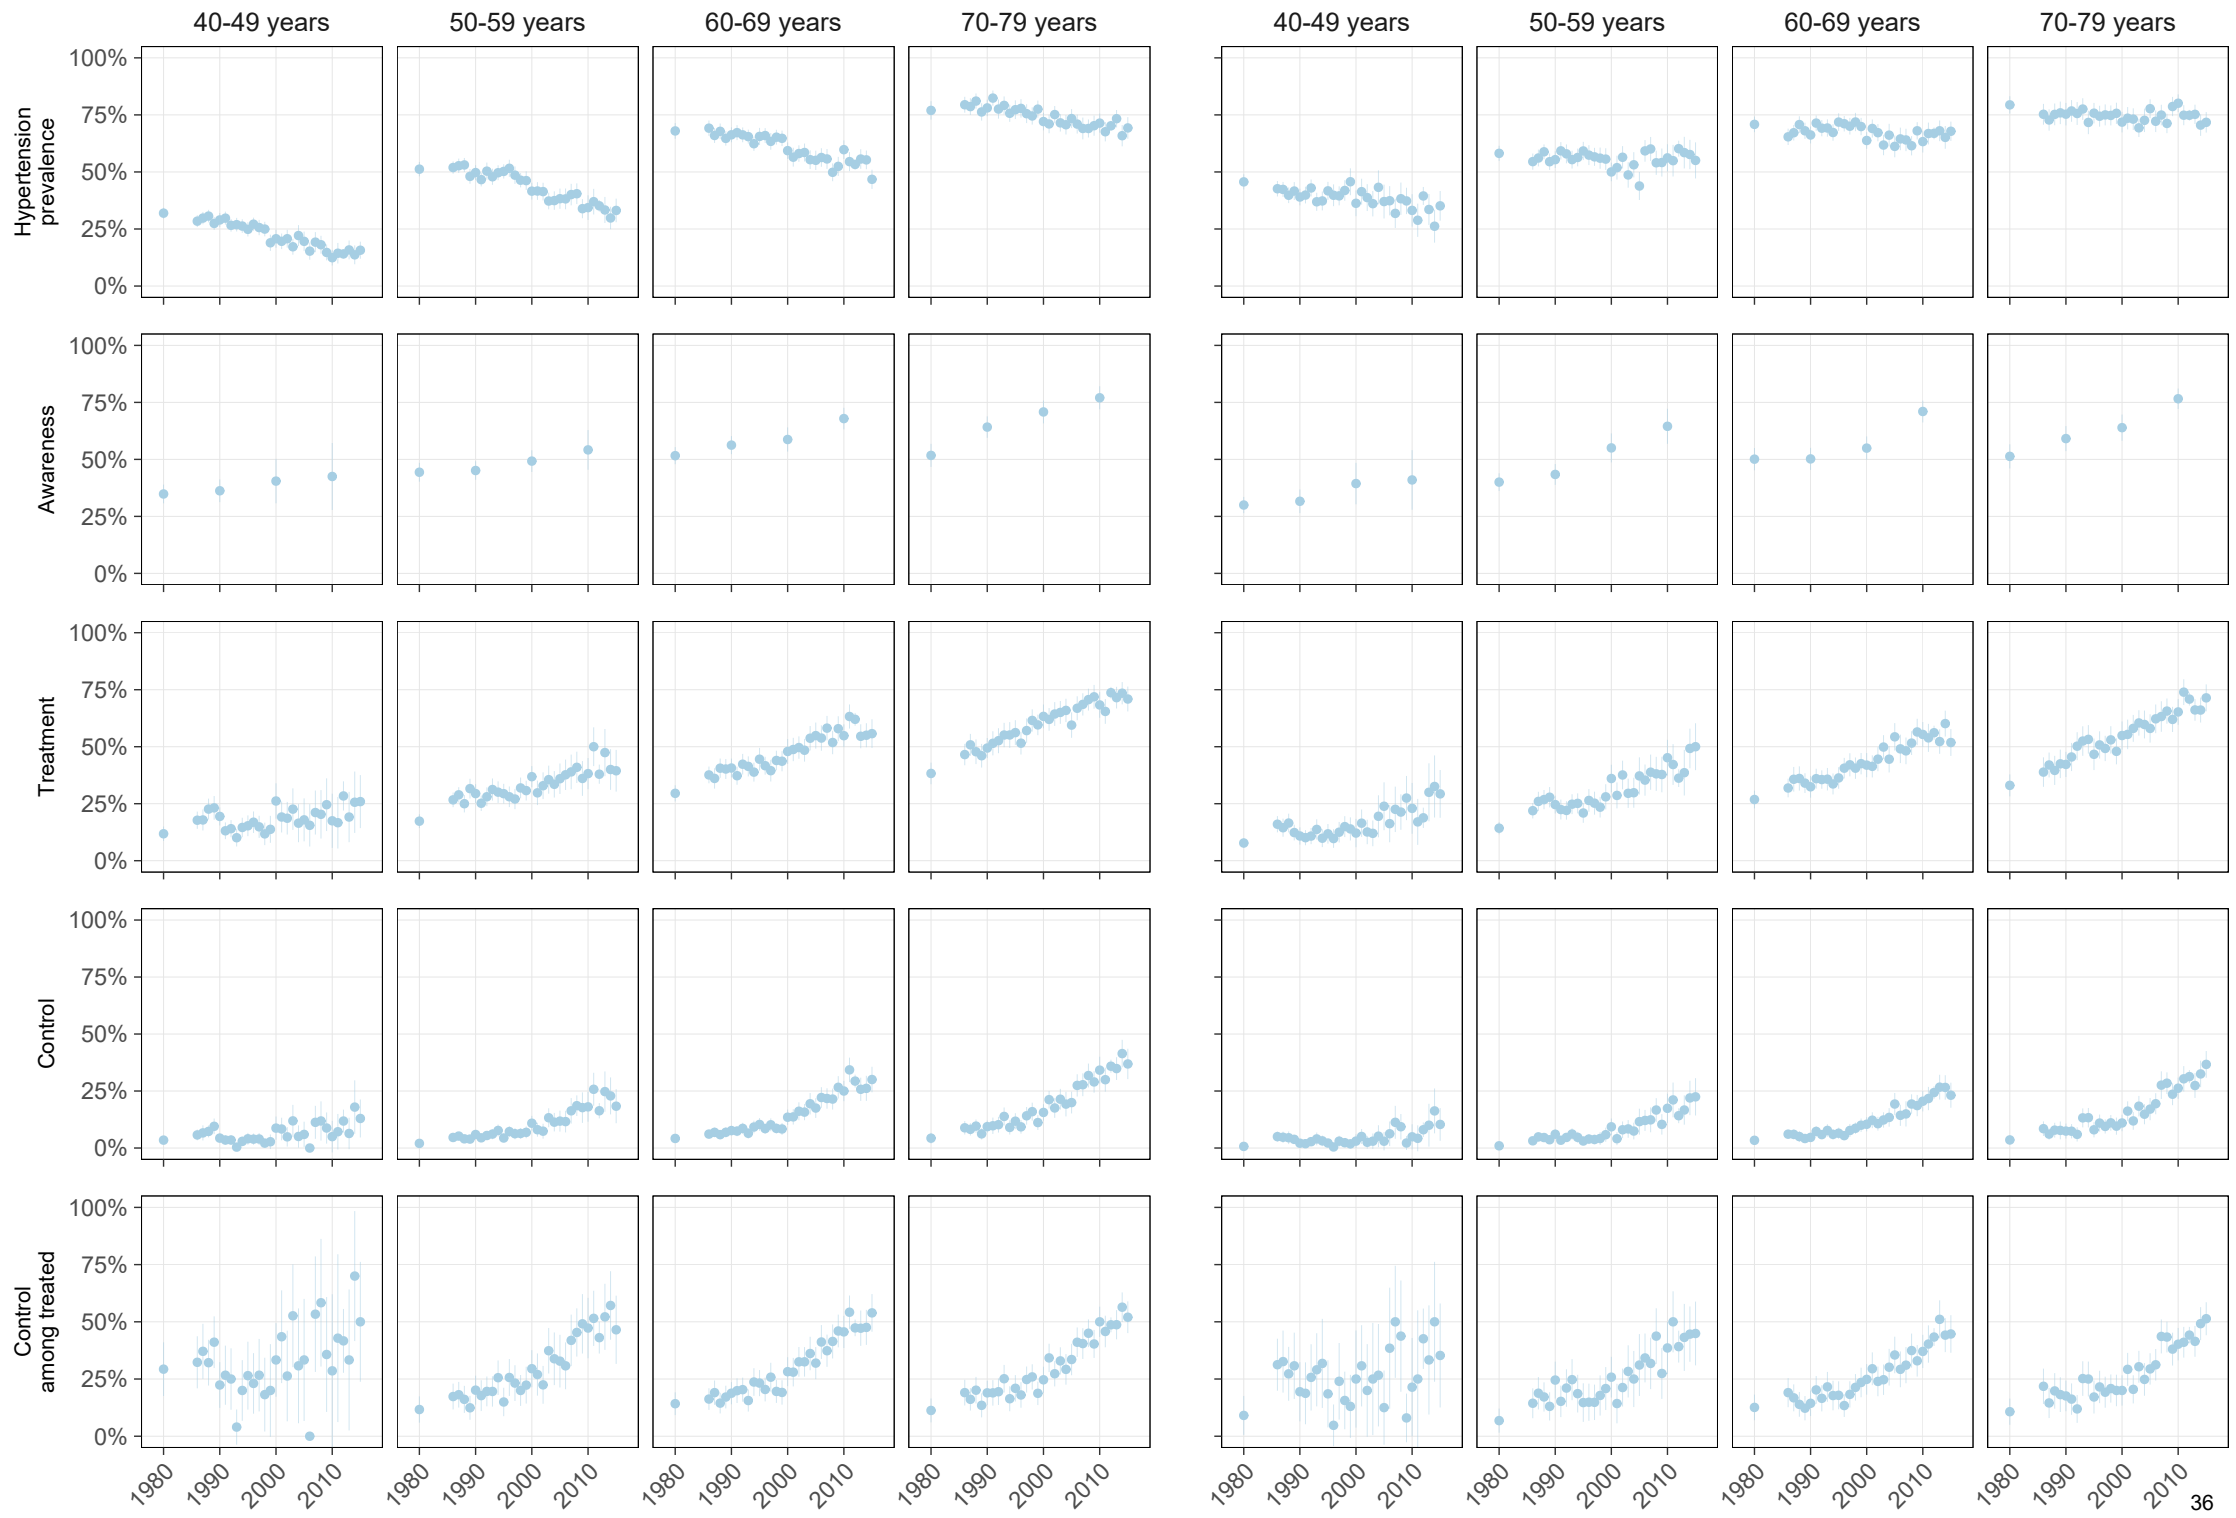

# New Zealand (women)

# New Zealand (men)

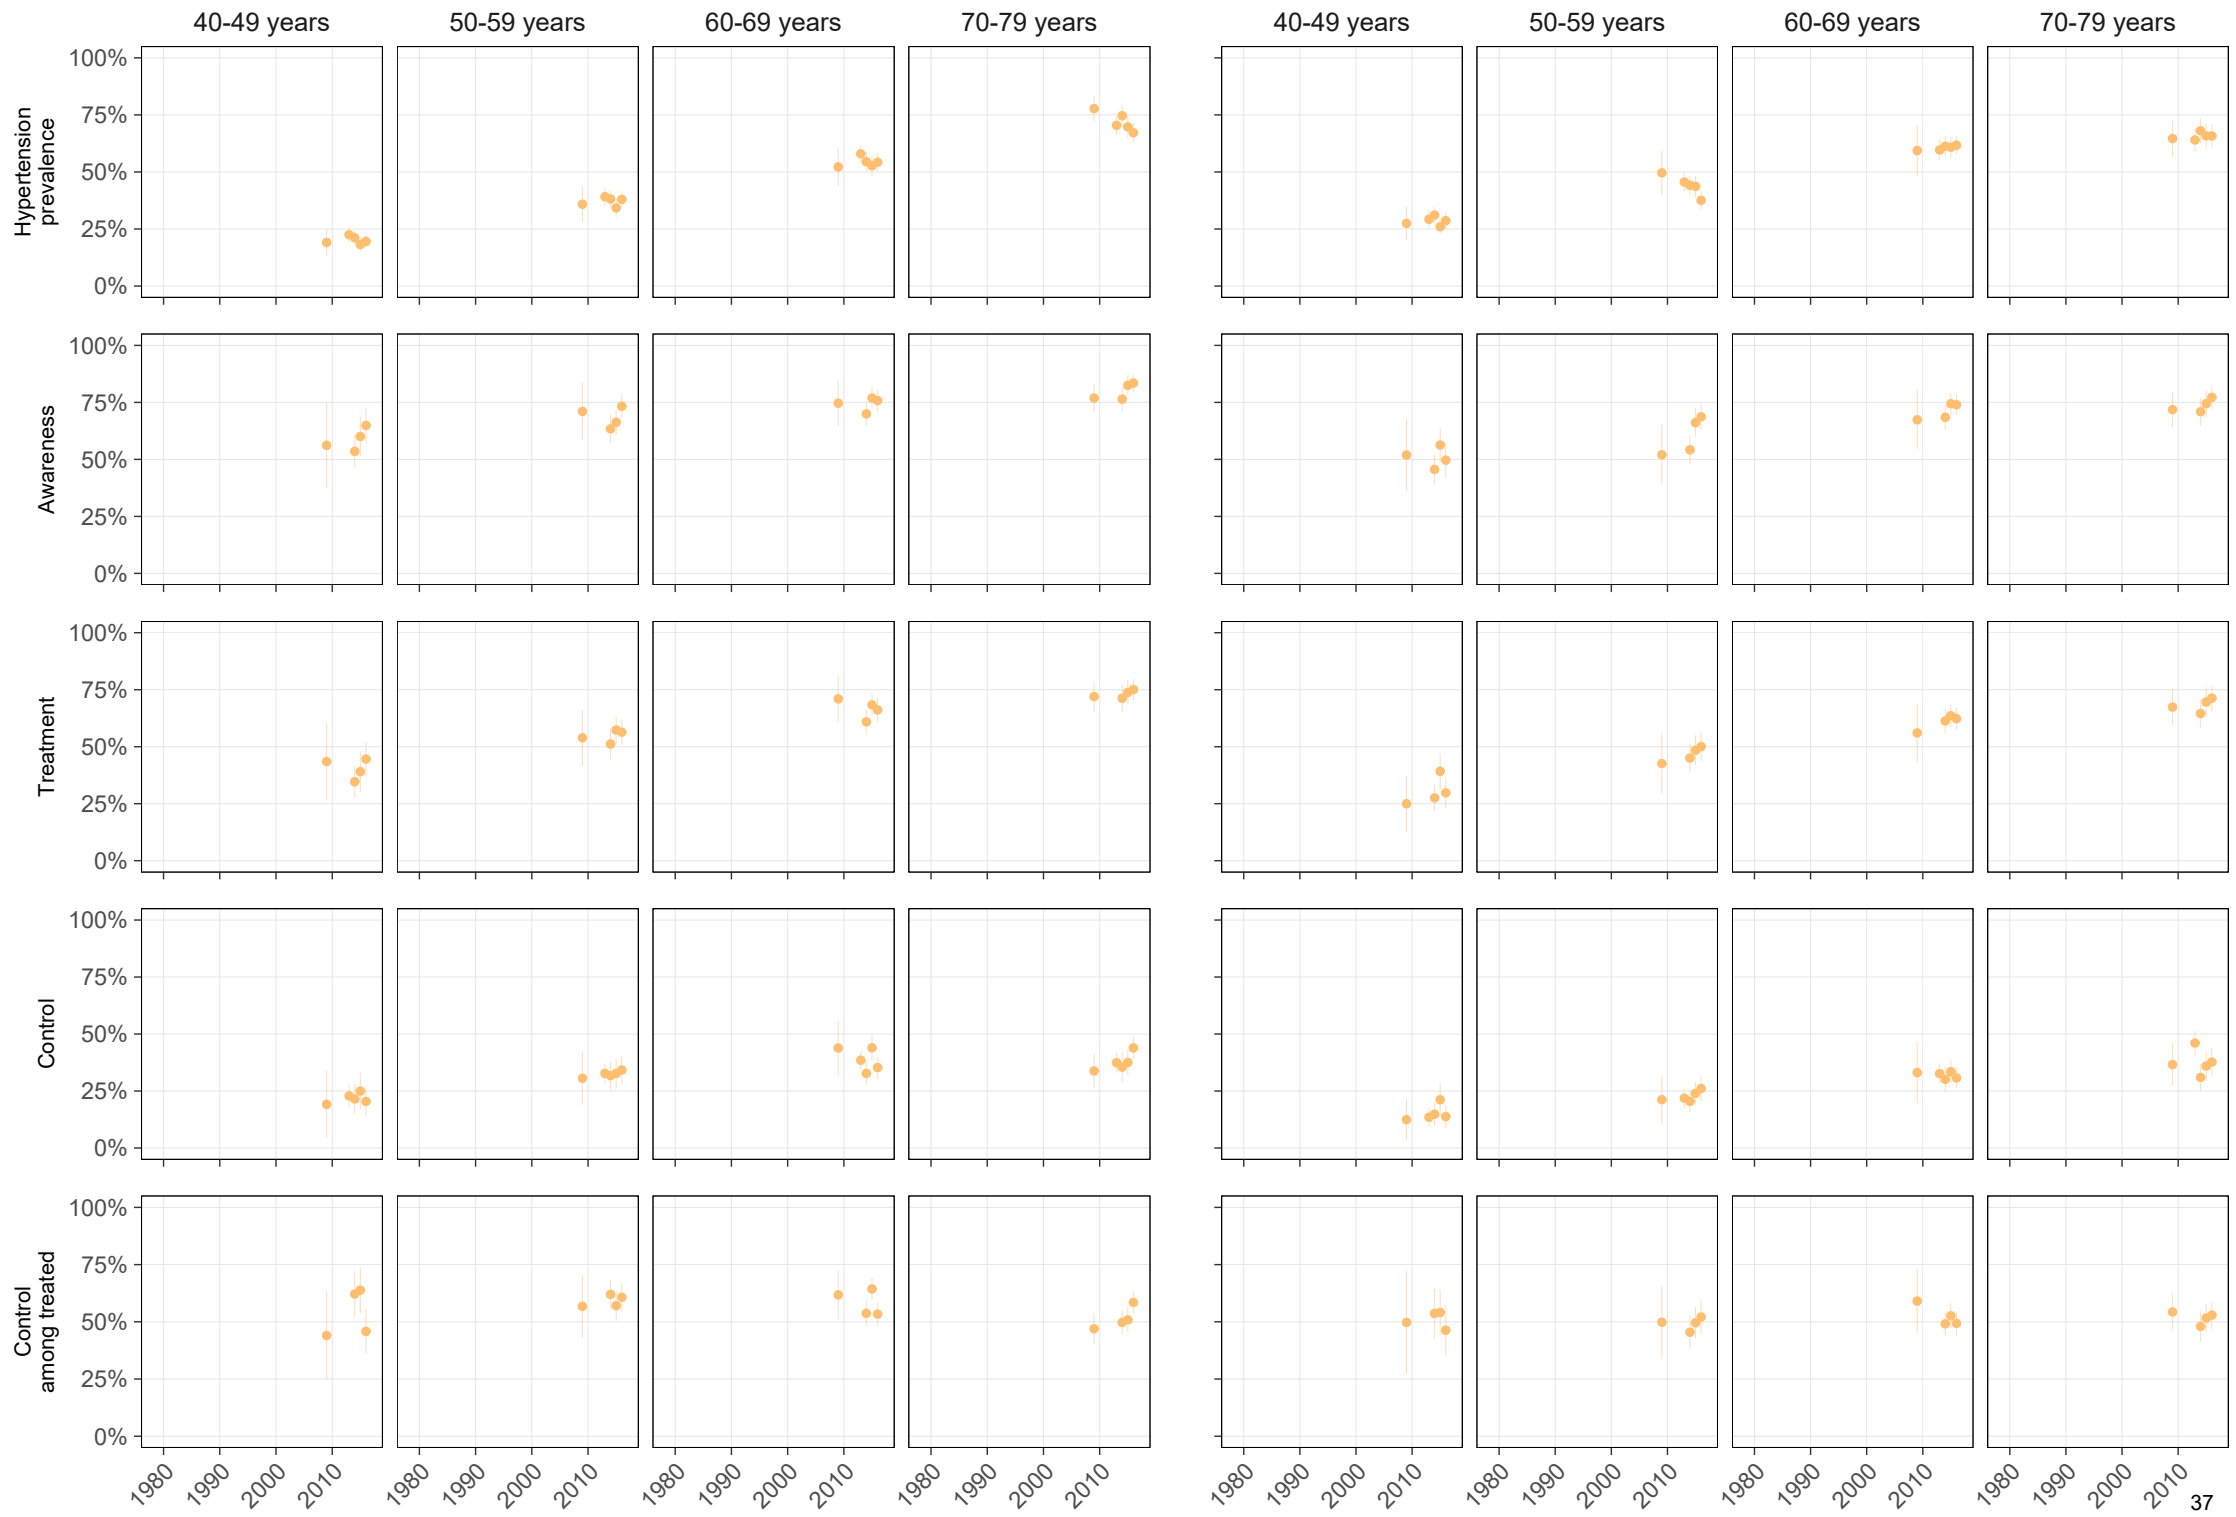

### South Korea (women)

### South Korea (men)

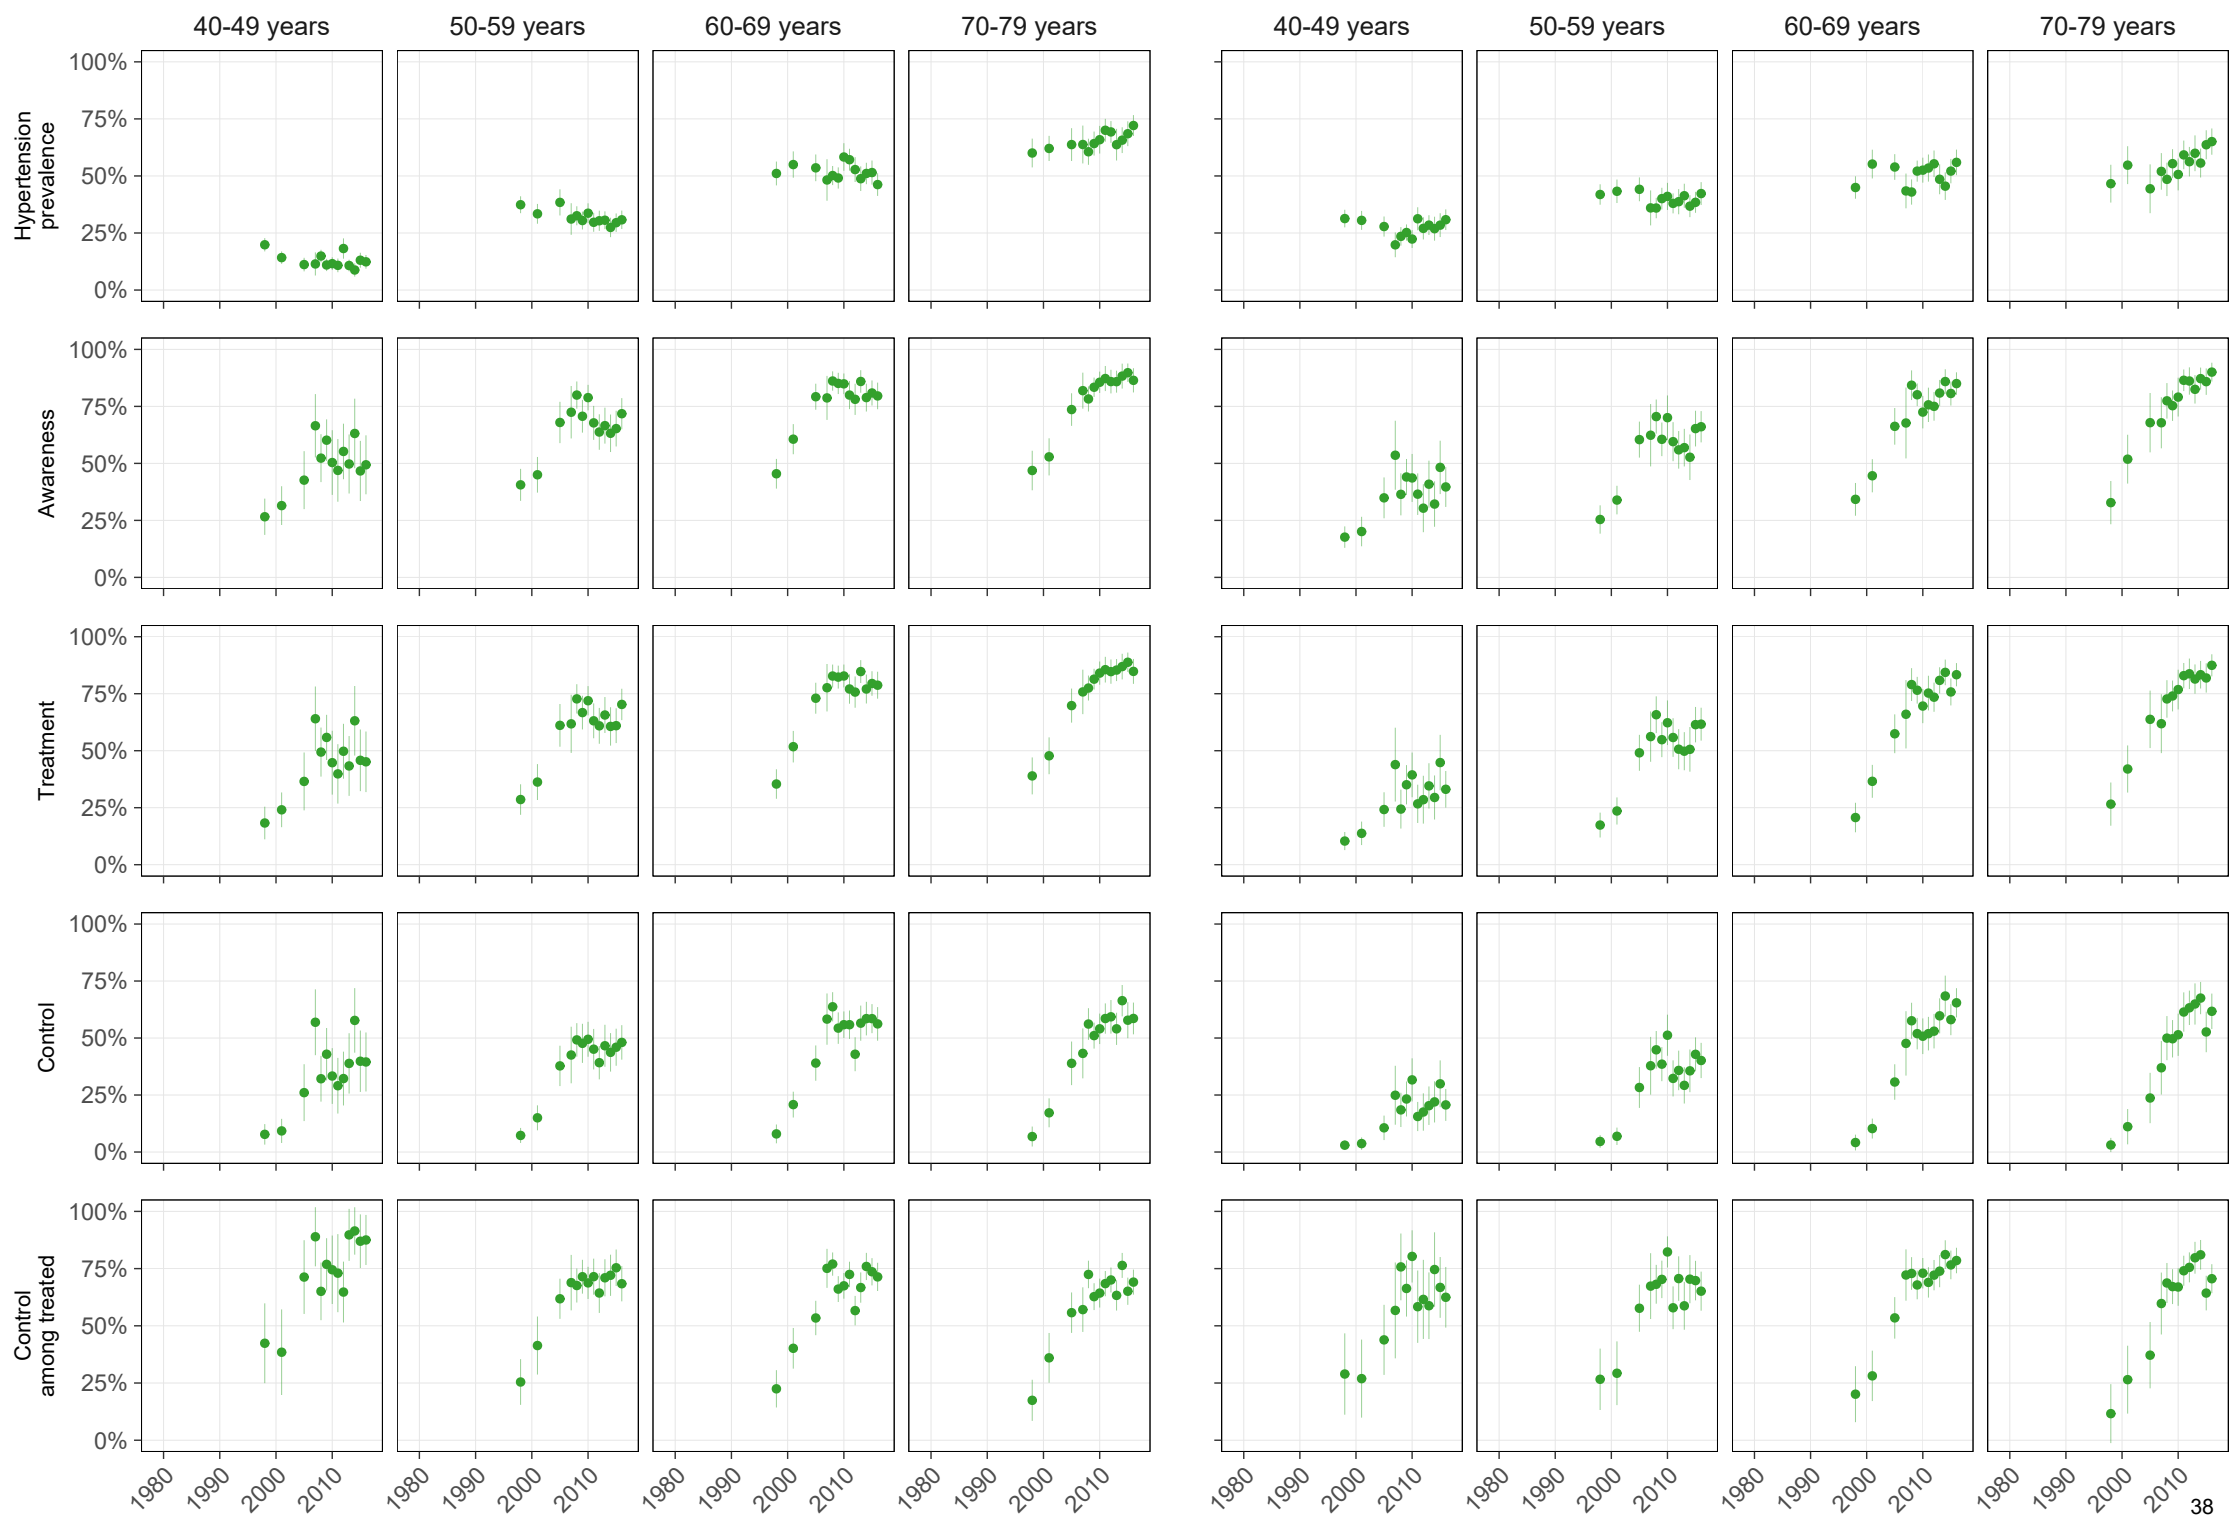

### Spain (women)

### Spain (men)

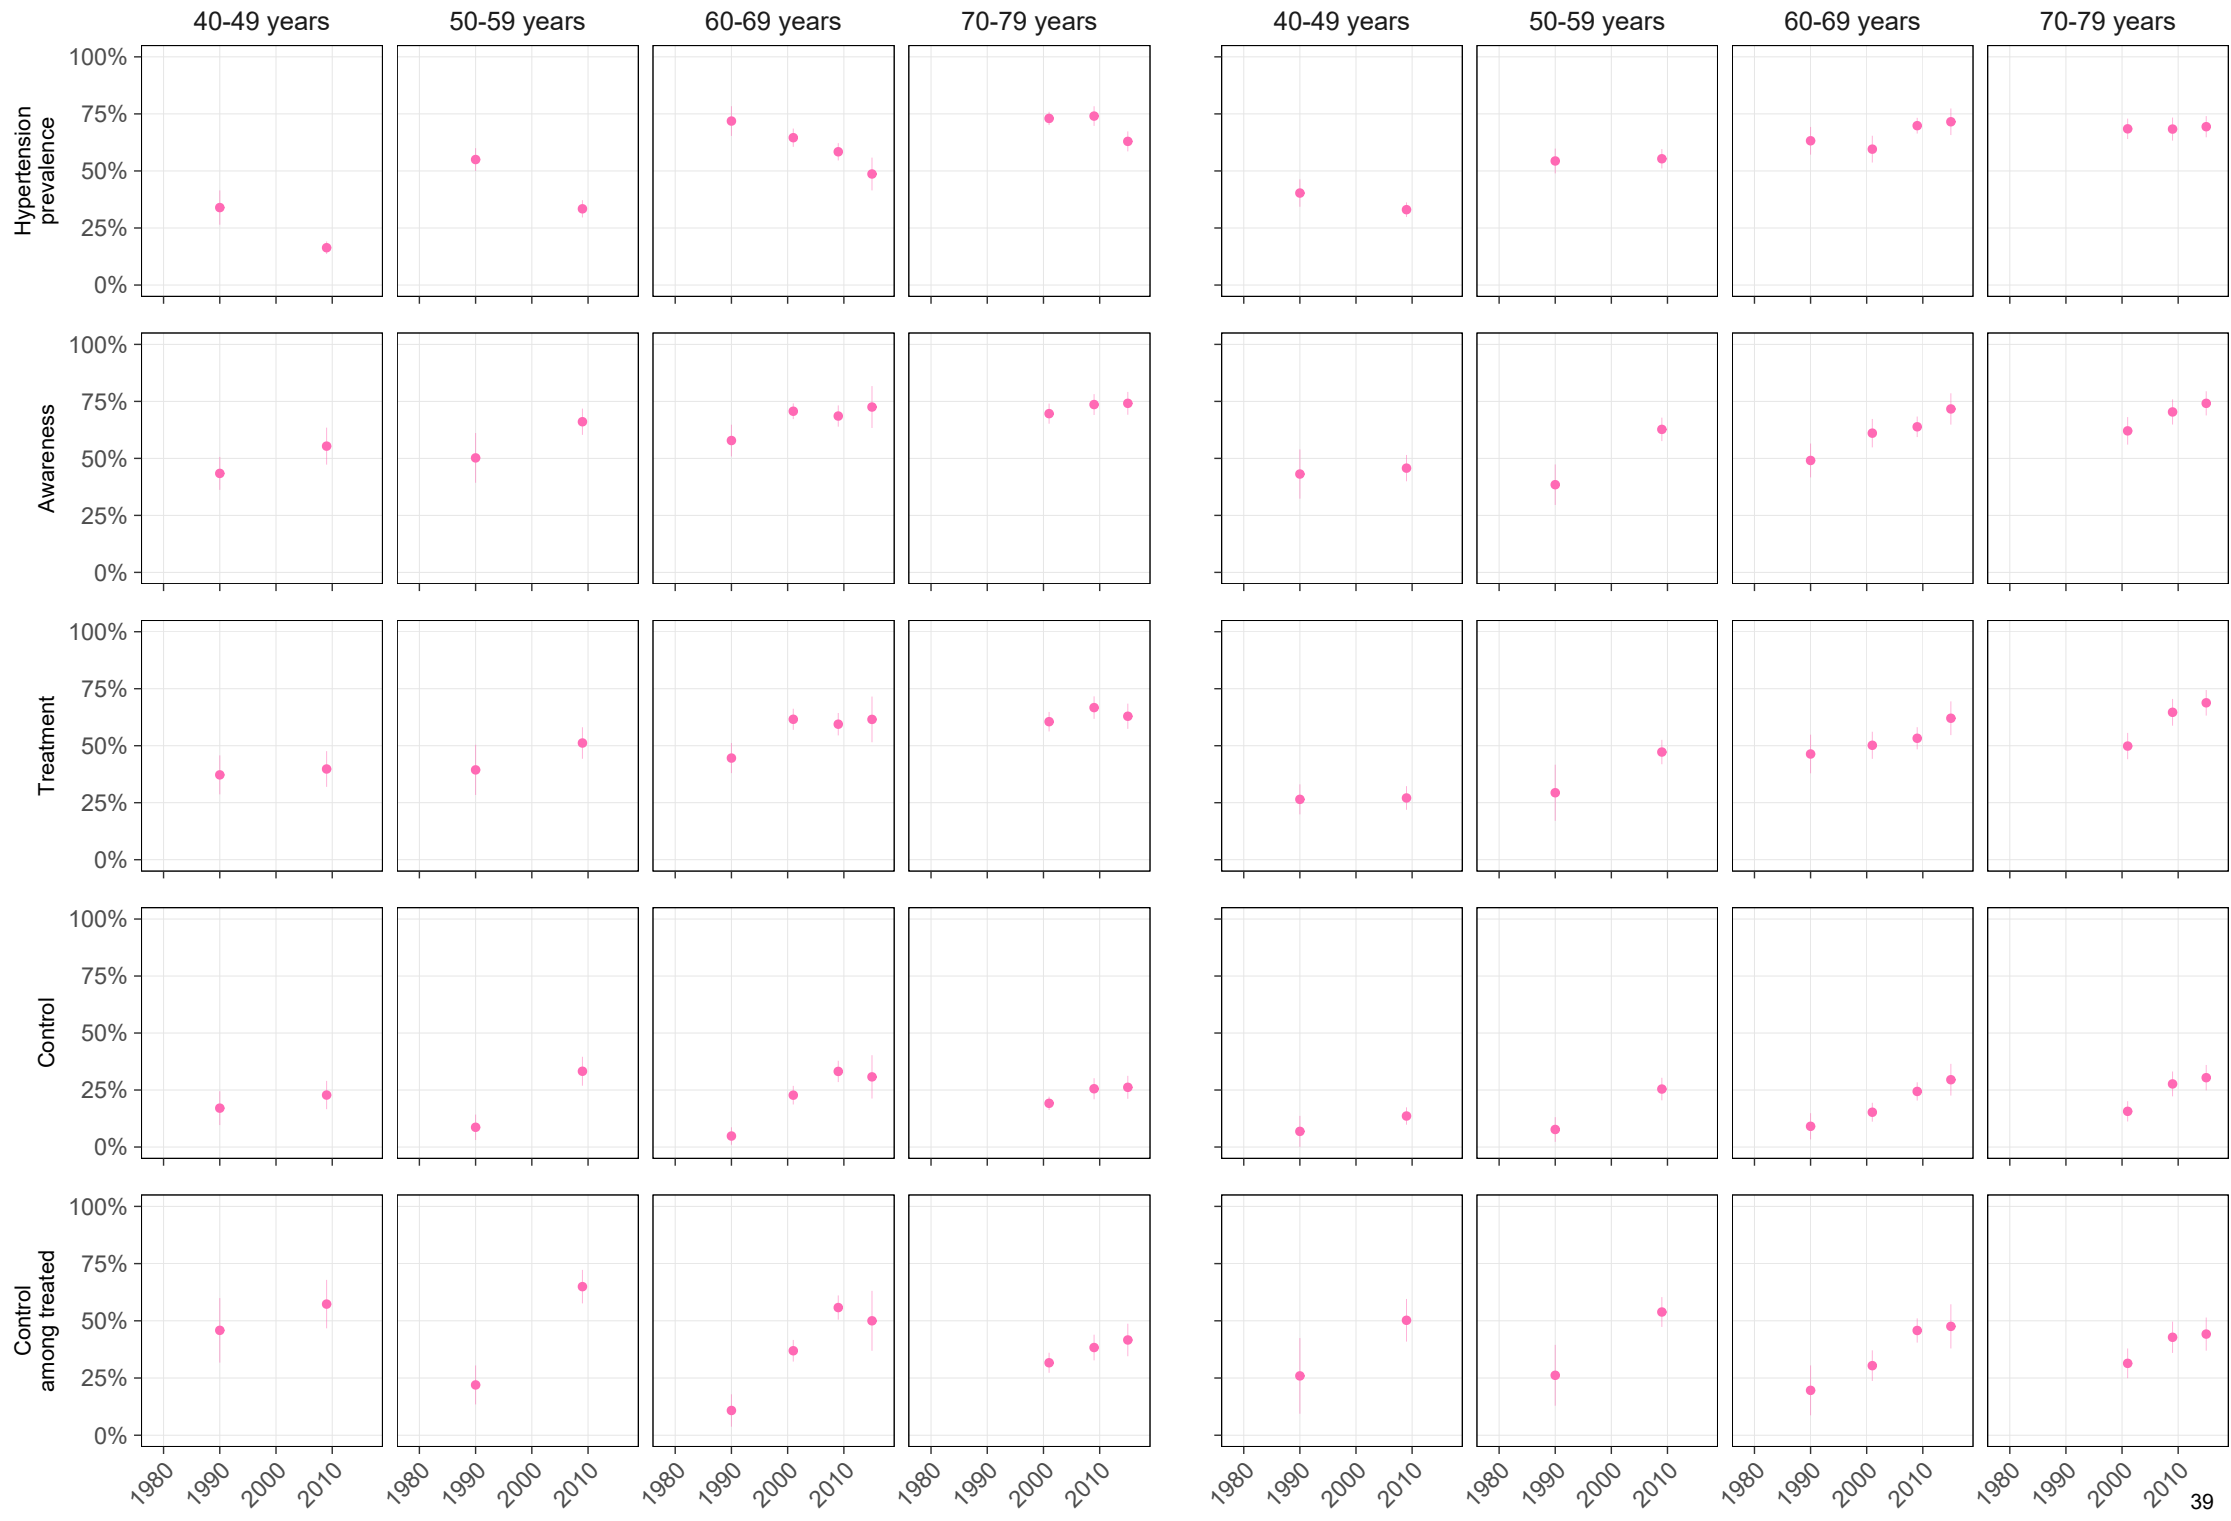



# United Kingdom (women)

# United Kingdom (men)

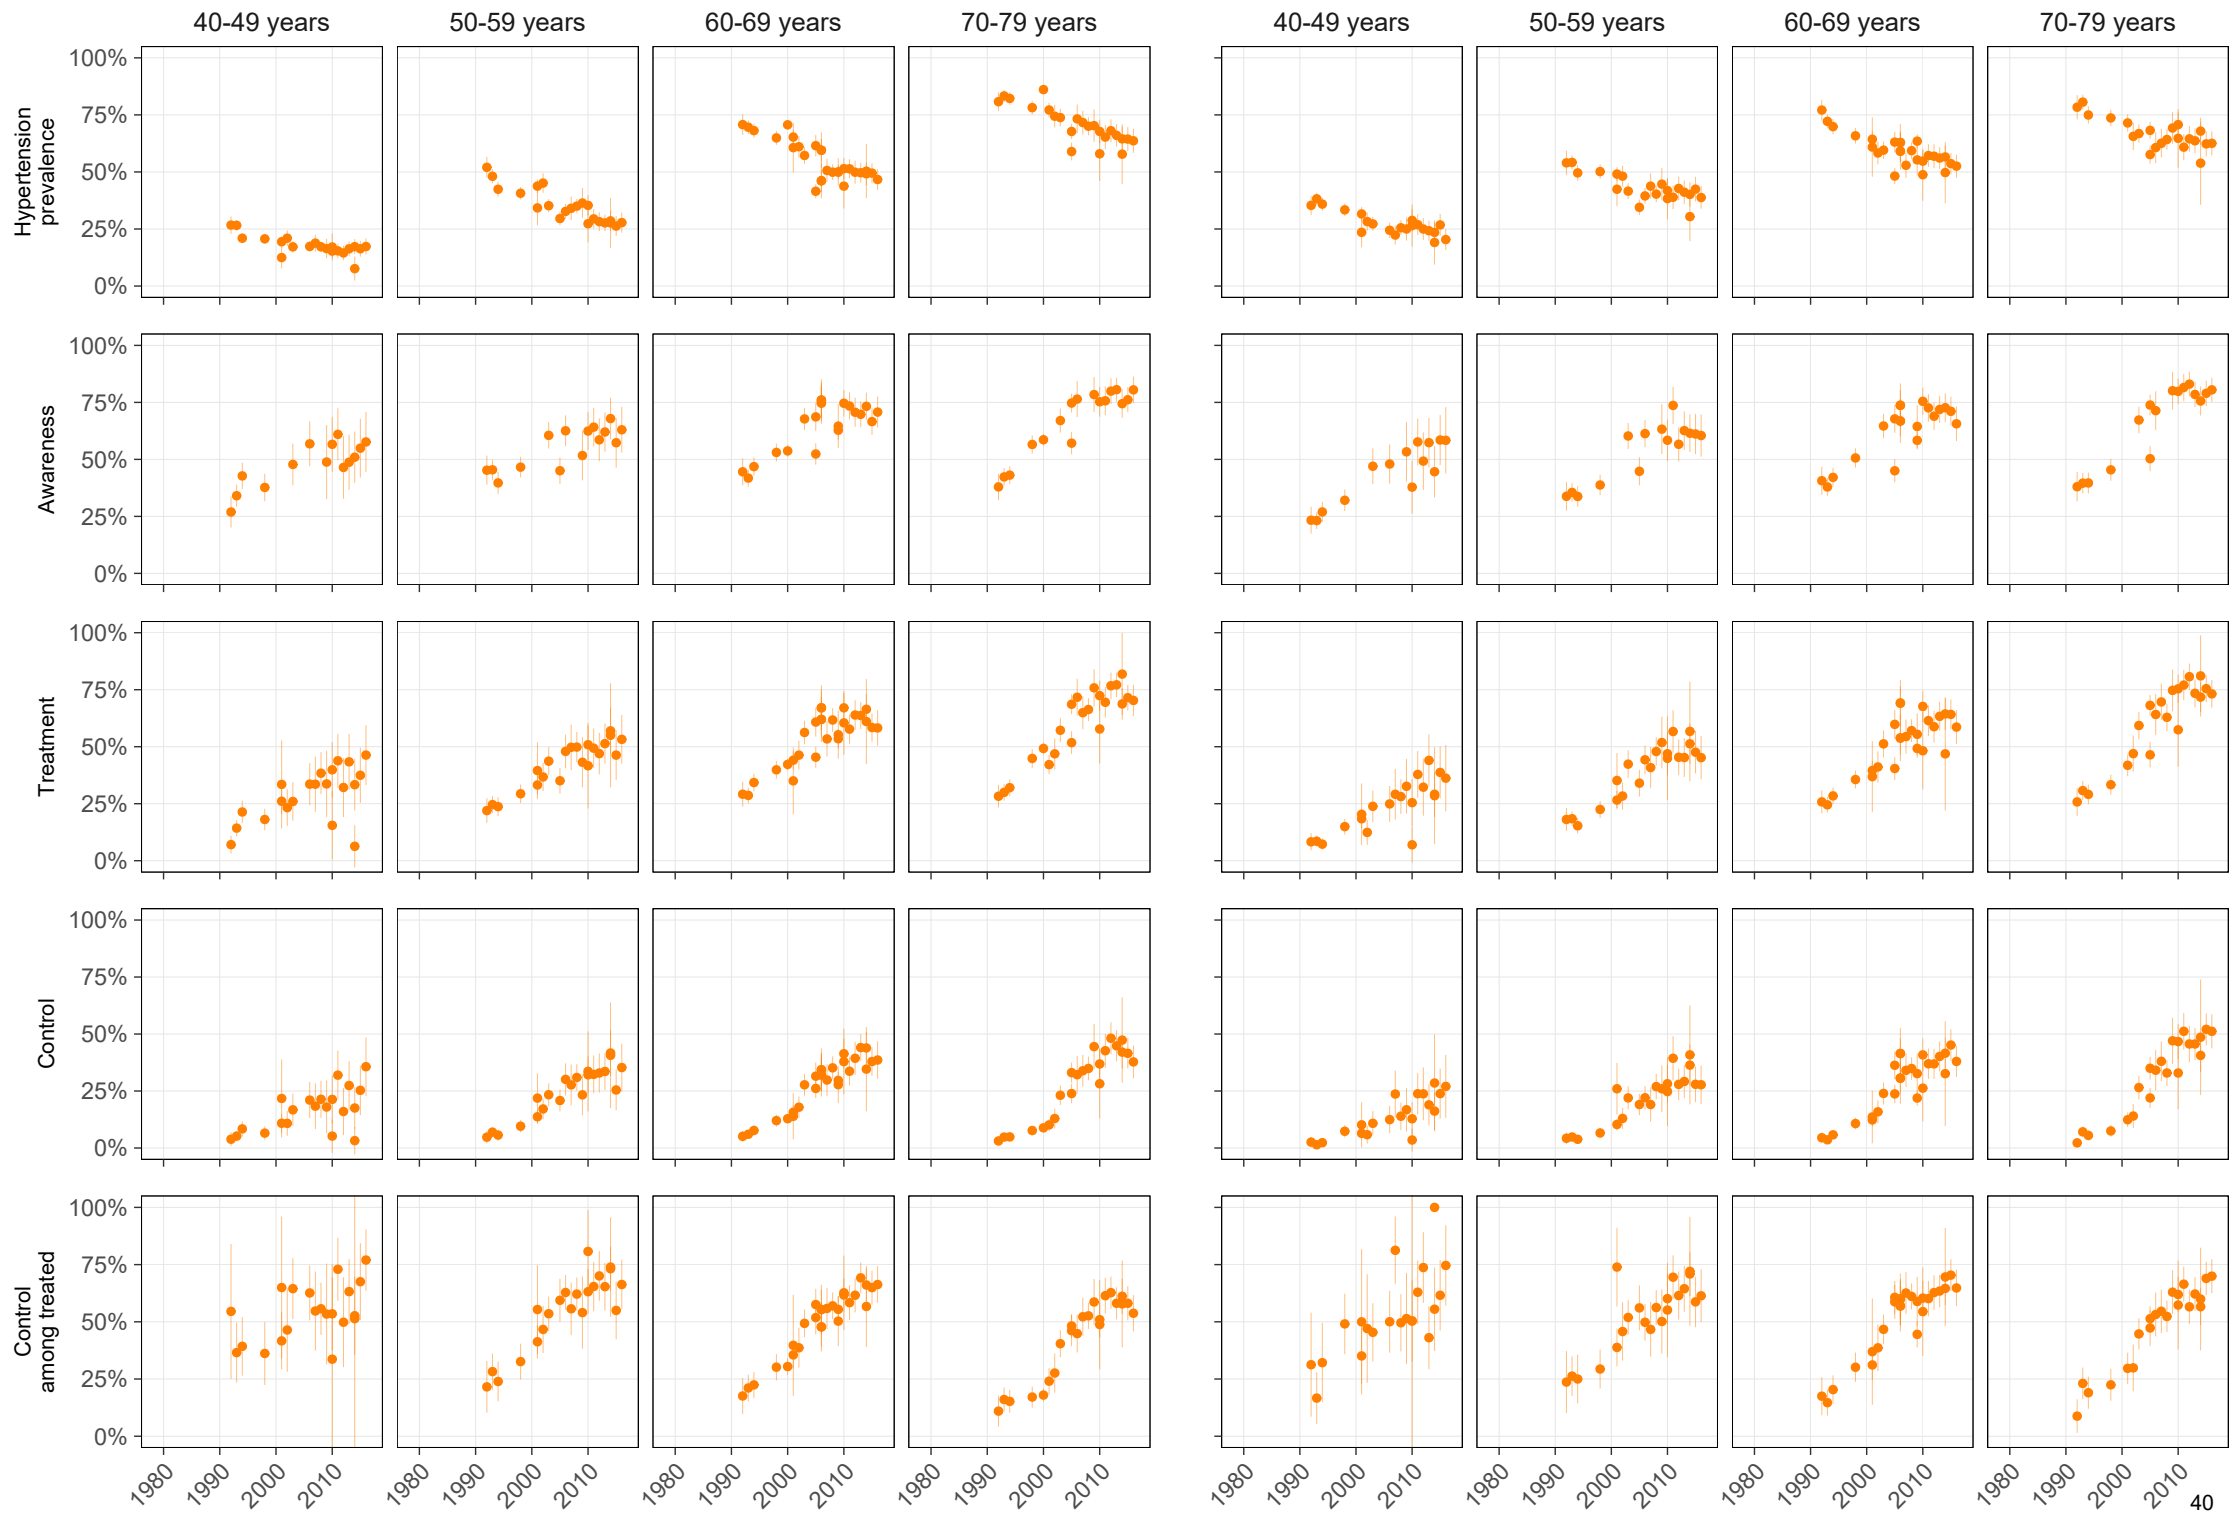

# United States of America (women)

# United States of America (men)

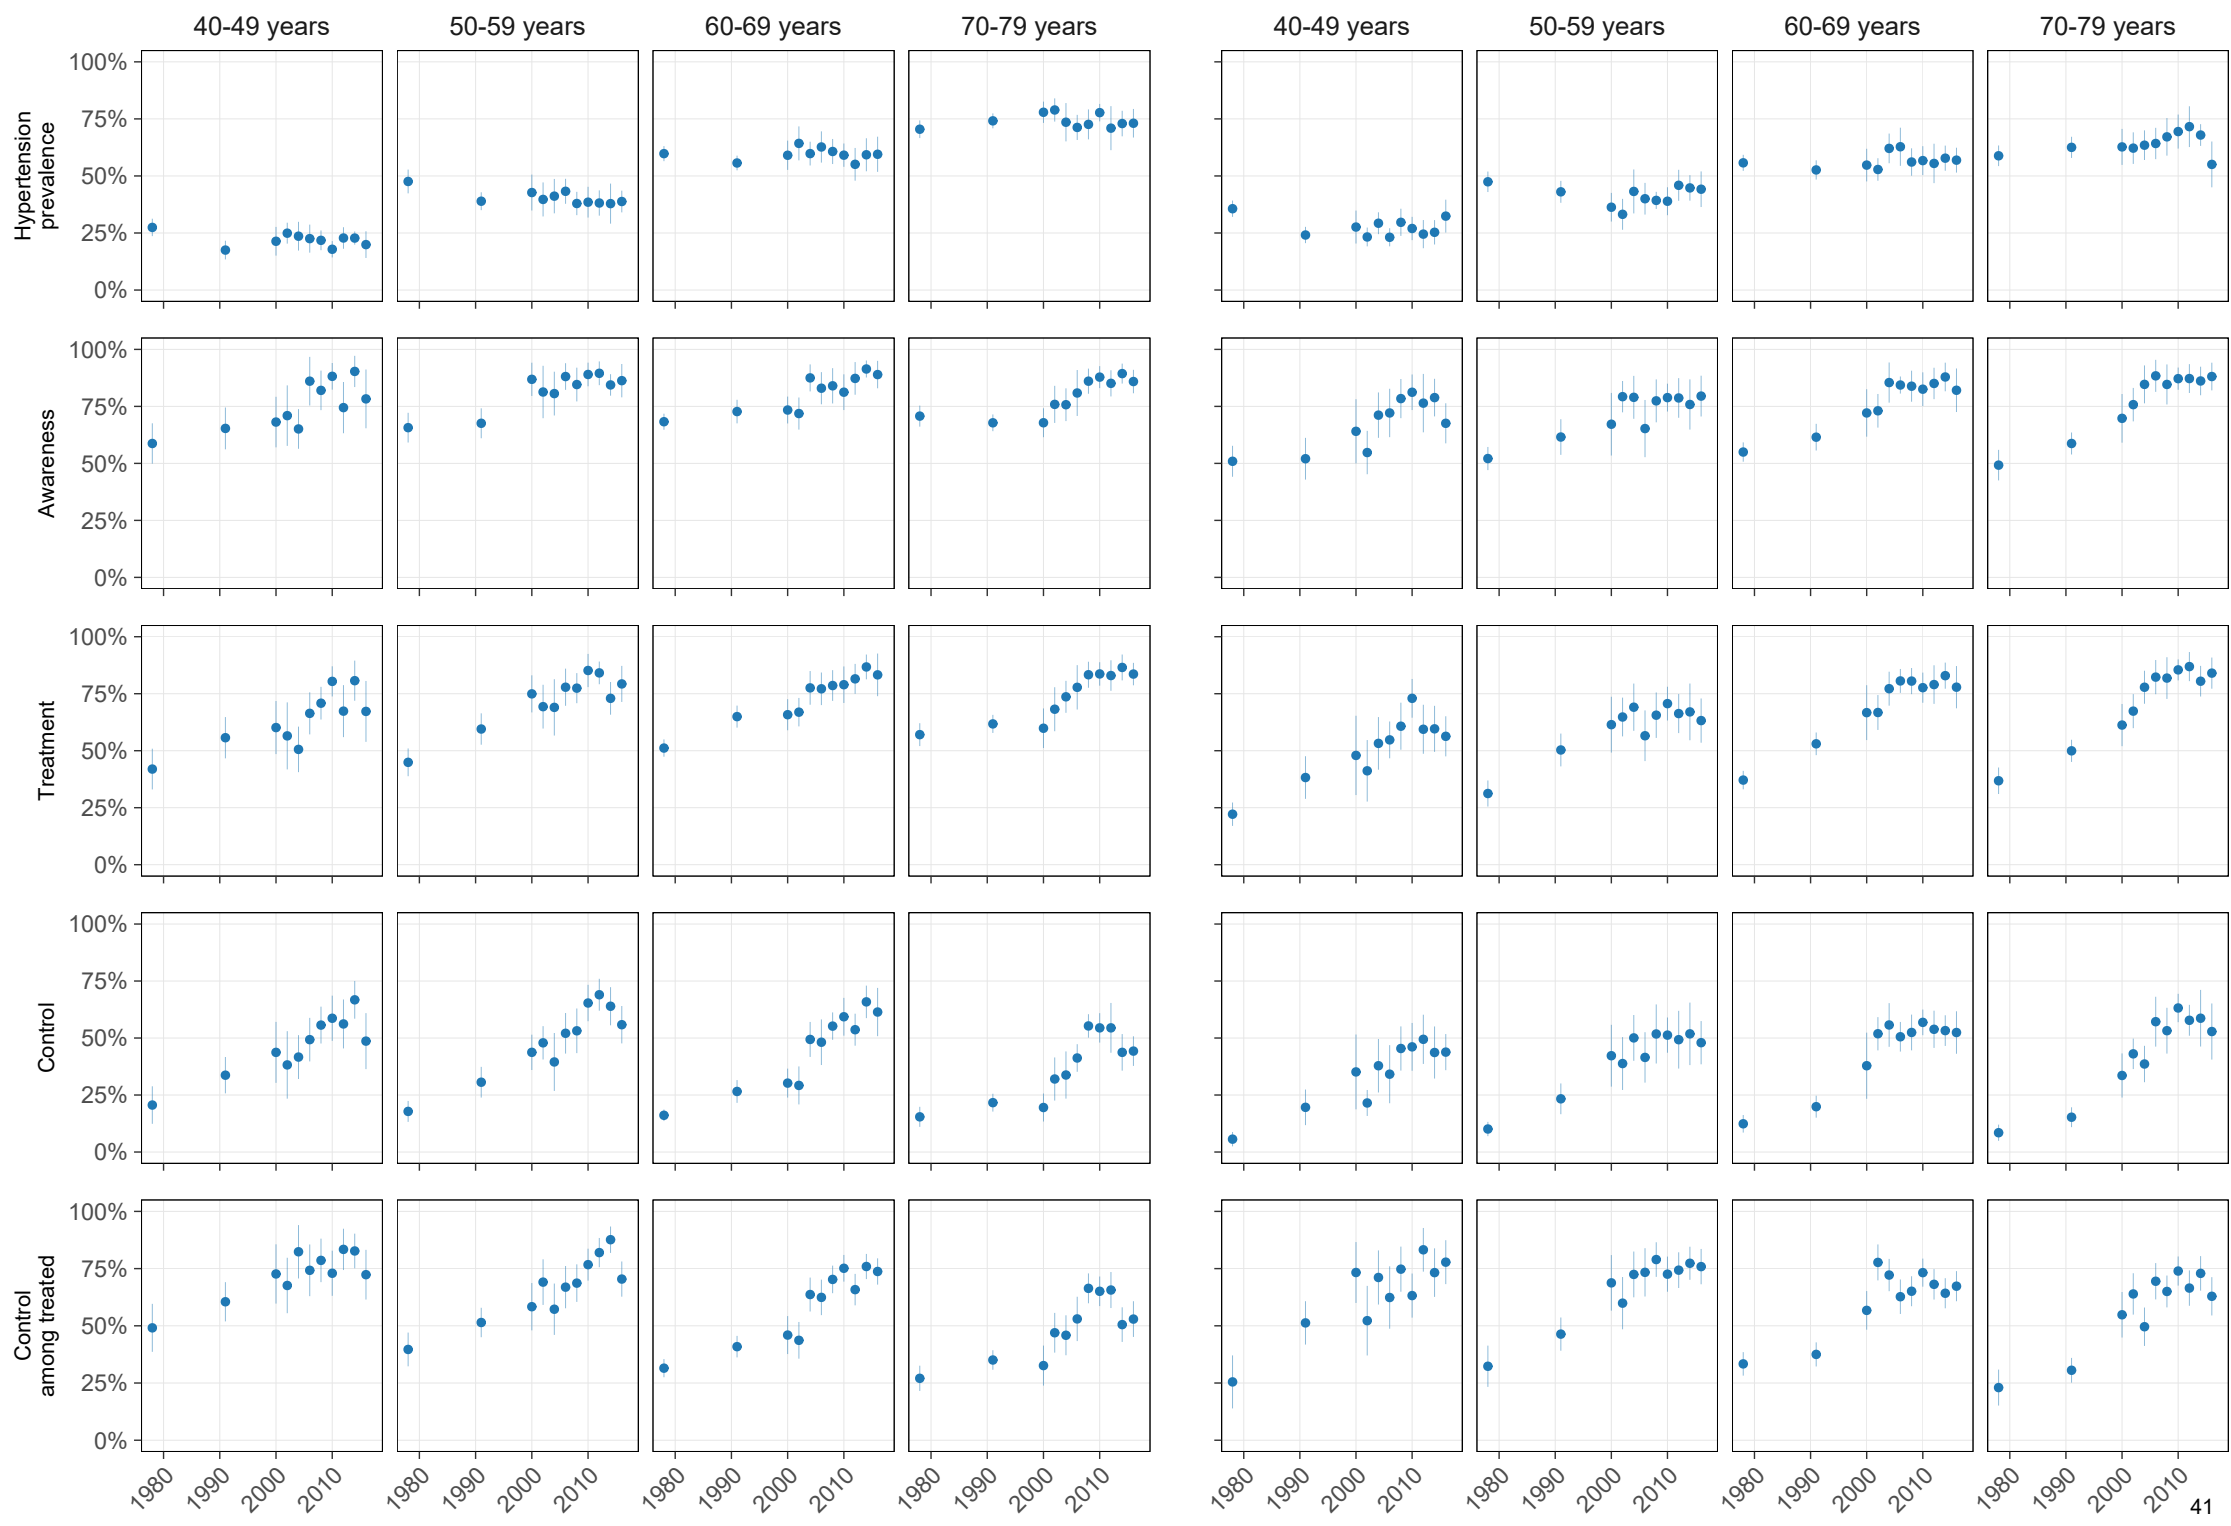

**Appendix Figure 2.** Distribution of participants by hypertension awareness, treatment, and control, and blood pressure status, in the latest national survey. Results shown are crude (ie, not age-standardised) to reflect the total burden of hypertension and its awareness, treatment, and control.

\* Hypertension awareness rate for men with systolic blood pressure  $\geq 160$  mm Hg or diastolic blood pressure  $\geq 100$  mm Hg was unavailable due to Canadian regulations on releasing data on outcomes with small numbers.

† The latest national survey in Spain had data for 60 to 79 years; data from an earlier survey in 2009 were used for 40 to 59 years.

‡ The latest national survey in Ireland had data for 50 to 79 years; data from an earlier survey in 2007 were used for 40 to 49 years.

§ The question on awareness was not asked in 2015 in Japan; awareness data from 2010 were used.

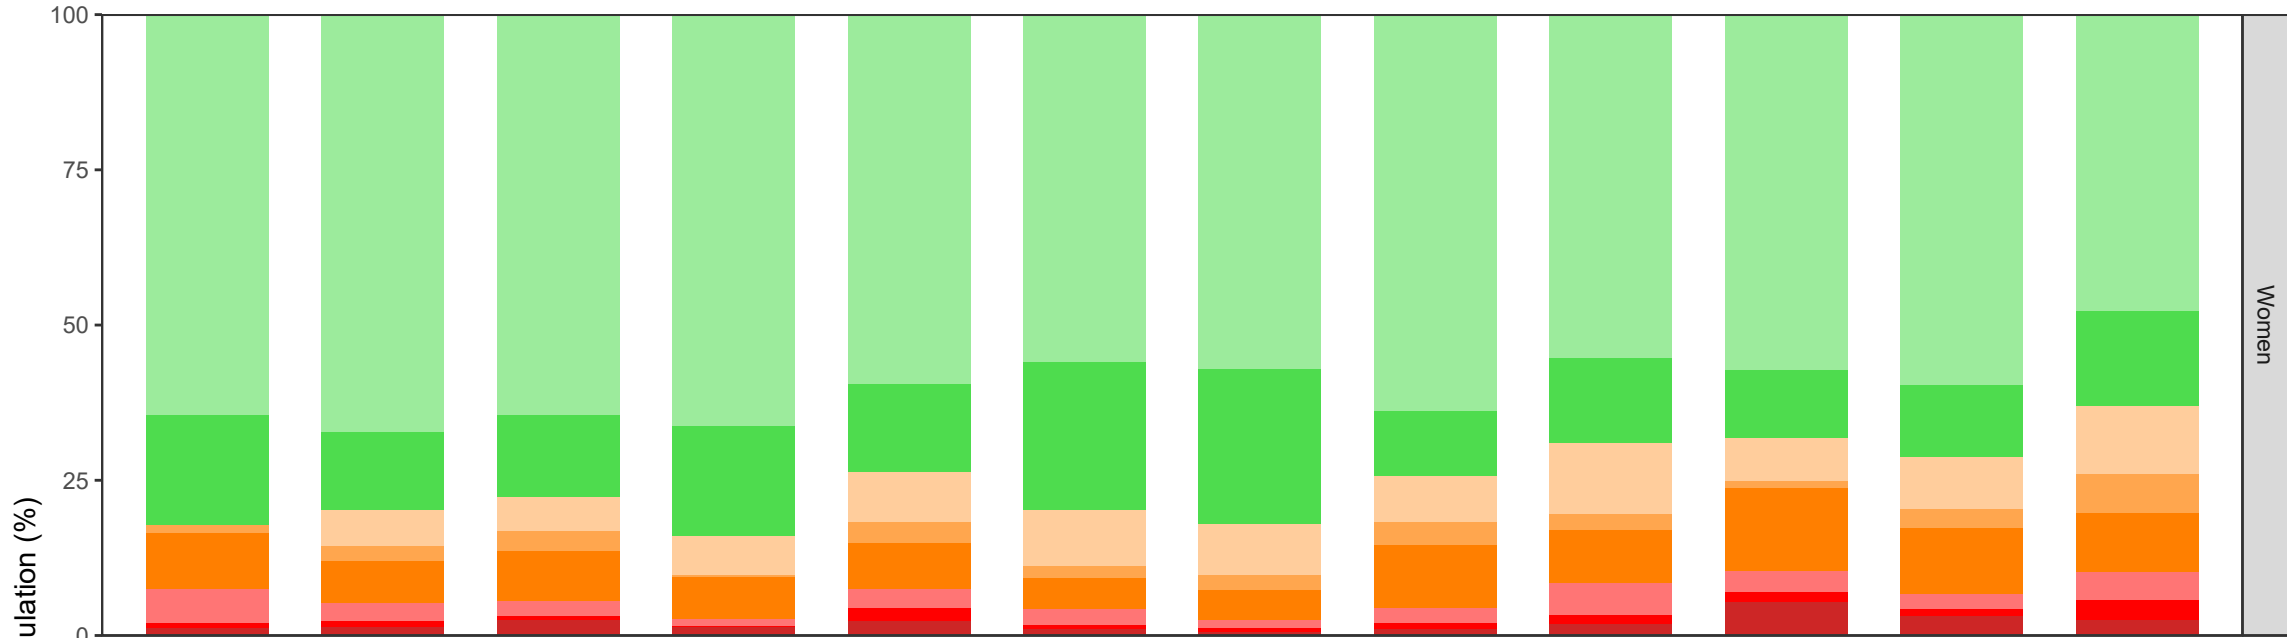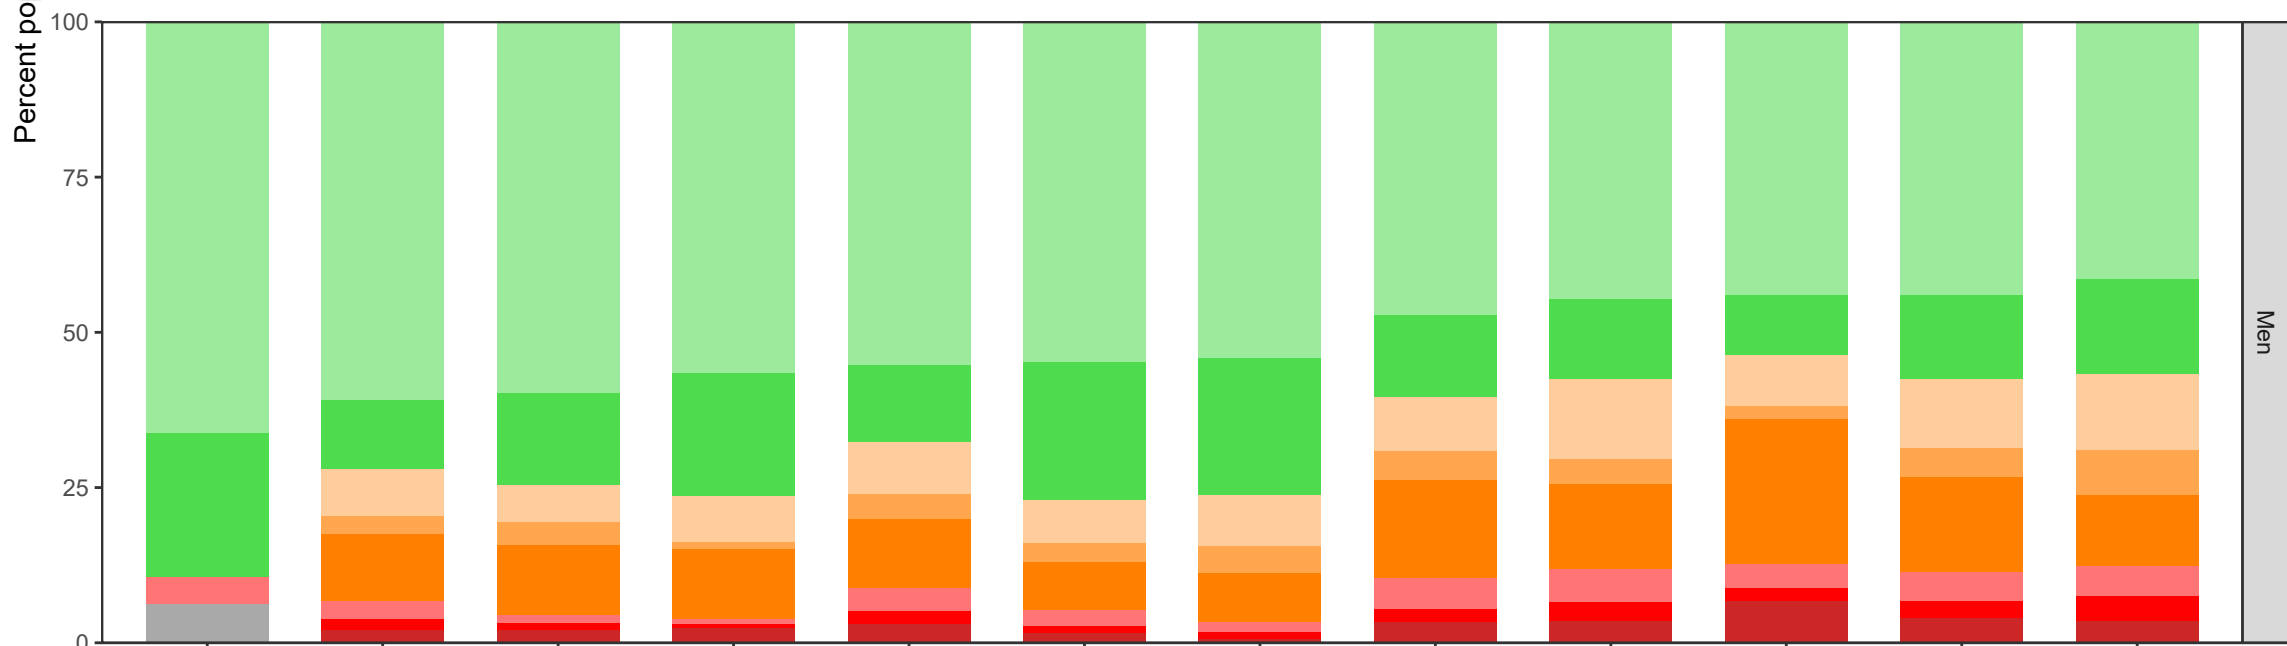

- BP <140/90 mmHg Not under treatment
- BP <140/90 mmHg Controlled to 140/90 mmHg
- see footnote \*
- 160/100 > BP ≥140/90 mmHg Treated but not controlled to 140/90 mmHg
- 160/100 > BP ≥140/90 mmHg Diagnosed but not treated
- 160/100 > BP ≥140/90 mmHg Undiagnosed
- BP ≥160/100 mmHg Treated but not controlled to 160/100 mmHg
- BP ≥160/100 mmHg Diagnosed but not treated
- BP ≥160/100 mmHg Undiagnosed
